# Supplementary material for: The evolution and future of carbonate precipitation in marine invertebrates: Witnessing extinction or documenting resilience in the Anthropocene?
Source: Oxford University Press journal article supplement (doi:10.12952/journal.elementa.000026), 2014-01-01
Supplement: elementa_000026_s001.xlsx [file elementa_000026_s001.xlsx]

## Sheet: Readme
Cross-phyla clustering of non-redundant carbonate organic matrix proteins from N-terminal and mass spectrometry COM sequencing, RT-PCR, or GO and KEGG annotation of genomic and transcriptomic data sets (from over 100 studies) grouped by hierarchical clustering using the CD-HIT suite web server (http://weizhong-lab.ucsd.edu/cd-hit/). The gene accession numbers are included. 1531 proteins reduced t…

## Sheet: SI Table 1
Protein Name	Coral	Mollusk	Sea urchin	Cellular Component Consensus GO Term
14-3-3 proteins	-	L. gigantea (lotgi205379, lotgi207549, lotgi222442) (Mann et al., 2012)	S. purpuratus (XP_003727876.1) (Mann et al., 2010)	Membrane
A Disintigrin/ Metalloproteinase with thrombospondin motfs	Acropora millepora (JR989905) (Moya et al., 2012)	-	Strongylocentrotus purpuratus (XP_780466) (Mann et al., 2010)	No Usable GO
Actin	Stylophora pistillata (KC342191, KC342193, KC149520) (Drake et al., 2013)	Lottia gigantea (lotgi202971) (Mann et al., 2012)	S. purpuratus (NP_999634) (Mann et al., 2008)	Cytoskeleton/cytoplasm
ADP ribosylation factor **	-	L. gigantea (lotgi210455, lotgi231498, lotgi236204) (Mann et al., 2012)	S. purpuratus (XP_780019.2, XP_791037.1) (Mann et al., 2008, Mann et al., 2010)	Golgi/ER
ATP synthase **	-	C. gigas (EKC39329.1, EKC39411.1) (Zhang et al., 2012); L. gigantea (lotgi206617, lotgi201878) (Mann et al., 2012)	S. purpuratus (NP_999743.1, NP_001116974.1) (Mann et al., 2010)	Mitochondria
Annexin	-	L. gigantea (lotgi195070, lotgi219490, lotgi219492) (Mann et al., 2012)	S. purpuratus (XP_003725708.1, XP_783004.3, XP_798157.2) (Mann et al., 2008, Mann et al., 2010)	Membrane
Antigen Ki-67 **	-	C. gigas (EKC25595.1) (Zhang et al., 2012)	S. purpuratus (XP_999722.1) (Mann et al., 2008)	Nuclear Region
Bone morphogenic protein*	-	Pinctada margaritifera (90c_1652_1) (Joubert et al., 2010)	S. purpuratus (NP_999820) (Mann et al., 2010)	Extracellular
Cadherin	A. millepora (JT011093) (Ramos-Silva et al., 2013); S. pistillata (KC509947, KC00002, KC509948) (Drake et al., 2013)	L. gigantea (lotgi106548) (Mann et al., 2012)	-	Membrane
Calcium activated chloride channel	-	L. gigantea (lotgi238844) (Mann et al., 2012)	S. purpuratus (XP_784730.2) (Mann et al. 2008)	No Usable GO
Calmodulin	-	P. margaritifera (90c_18304_5, 90c_783_6) (Joubert et al., 2010); P. fucata (AY663847) (Li et al., 2005); L. gigantea (lotgi148903, lotgi219843) (Mann et al., 2012); C. gigas (EKC42677.1) (Zhang et al., 2012)	S. purpuratus (XP_003726932) (Mann et al., 2008)	Membrane
Chitotriosidase	A. millepora (JR980703.1) (Moya et al., 2012)	C. gigas (EKC38805.1) (Zhang et al., 2012)	-	Extracellular/membrane
CUB and peptidase containing	A. millepora (JR970990, JT008002) (Ramos-Silva et al., 2013)	C. gigas (EKC18230) (Zhang et al., 2012)	-	No Usable GO
Cyclophilin	-	C. gigas (EKC37378.1, EKC37379.1) (Zhang et al., 2012); L. gigantea (lotgi223760, lotgi222979, lotgi212757) (Mann et al., 2012)	S. purpuratus (XP_790143.2, NP_001028819.1, SPU008305, SPU007484) (Mann et al., 2008b, Mann et al., 2010, Todgham & Hoffman, 2009)	Other
Cystatin	-	L. gigantea (lotgi229619) (Mann et al., 2012)	S. purpuratus (XP_784732.2) (Mann et al., 2010)	No Usable GO
Dentin matrix protein	-	L. gigantea (lotgi156599) (Mann et al., 2012)	S. purpuratus (XP_791445.3) (Mann et al., 2008)	Other
Dual oxidase	-	L. gigantea (lotgi99809) (Mann et al., 2012)	S. purpuratus (NP_001118237) (Mann et al., 2008)	Extracellular/membrane
Dynein	-	L. gigantea (lotgi203845) (Mann et al., 2012)	S. purpuratus (XP_795406.2, XP_799949.3) (Mann et al., 2008)	Microtubules
EGF/Notch	A. millepora (JT010134, JR979981, JT013839, JR973087, JT002642, JR986374, JR986173) (Moya et al., 2012)	L. gigantea (lotgi230171) (Mann et al., 2012)	S. purpuratus (XP_780602, XP_003723785, XP_001179074) (Mann et al., 2010)	Extracellular
Elongation factor **	-	C. gigas (EKC33063.1) (Zhang et al., 2012); L. gigantea (lotgi239271, lotgi199050) (Mann et al., 2012)	S. purpuratus (NP_001116969.1, XP_001175642.1) (Mann et al., 2008, Mann et al., 2010)	Cytoplasm
Enolase	-	L. gigantea (lotgi182683) (Mann et al., 2012)	S. purpuratus (XP_003726238.1) (Mann et al., 2008, Mann et al., 2010)	Other
Ferritin	-	L. gigantea (lotgi123691, lotgi178880) (Mann et al., 2012); P. margaritifera (Joubert et al., 2010)	S. purpuratus (XP_796152.1, XP_003730718.1) (Mann et al., 2008)	No Usable GO
Fibrogenin	A millepora (JT001283.1, JT013475) (Moya et al. 2012)	C. gigas (EKC37595.1, EKC37598.1) (Zhang et al., 2012)	-	Extracellular
Gelsolin	-	L. gigantea (lotgi105757, lotgi144968, lotgi192582, lotgi214936) (Mann et al., 2012)	S. purpuratus (XP_792912.2) (Mann et al., 2008)	Cytoskeleton/cytoplasm
Glyceraldehyde 3 phosphate dehydrogenase	S. pistillata (KC149521) (Drake et al., 2013)	L. gigantea (lotgi222542) (Mann et al., 2012)	-	Other
Heat shock protein	-	L. gigantea (lotgi161608) (Mann et al., 2012)	S. purpuratus (XP_781407.2, XP_783030.3), NP_999808.1) (Mann et al., 2010)	Membrane
Heat shock protein 70	-	C. gigas (EKC36325.1) (Zhang et al., 2012); L. gigantea (lotgi216416, lotgi177837, lotgi190284, lotgi159745) (Mann et al., 2012)	S. purpuratus (XP_003728714.1, XP_780151.1, XP_003725496.1) (Zhang et al., 2012)	Membrane
Hephaestin/Ceruplasmin	A. millepora (JT019463) (Moya et al., 2012)	L. gigantea (lotgi83160, lotgi115607) (Mann et al., 2012)	S. purpuratus (XP_791569) (Mann et al., 2010)	Extracellular/membrane
Histone **	-	L. gigantea (lotgi175997, lotgi181153) (Mann et al., 2012)	S. purpuratus (XP_00117550, NP_999707.1, NP_001229615.1, P0899.1) (Mann et al., 2008, Mann et al., 2010)	Nuclear Region
LDL receptor	A. millepora (JT010466) (Moya et al., 2012)	-	S. purpuratus (XP_003727007, XP_787118, XP_782026) (Mann et al., 2008b, Mann et al., 2010)	Membrane
Matrix metalloproteinase	A. millepora (JT016142) (Moya et al., 2012)	L. gigantea (lotgi231475) (Mann et al., 2012)	S. purpuratus (XP_003729123, XP_003729017, XP_003729016, XP_786545, XP_003725556, XP_791616, XP_791600, NP_001028820, XP_780356) (Mann et al., 2008b, Mann et al., 2010, Stumpp et al., 2011)	Extracellular
MEC2	-	L. gigantea (lotgi214616) (Mann et al., 2012)	S. purpuratus (XP_003726858.1) (Mann et al., 2008)	Membrane
Metallo endopeptidase/ Endothelin converting enzyme	A. millepora (JT013571, JT011929) (Moya et al., 2012)	-	S. purpuratus (XP_781407) (Mann et al., 2010)	Other
MSP	-	L. gigantea (lotgi190352) (Mann et al., 2012)	S. purpuratus (AF519420.1, NP_9998076.1,NP_999807.1, XP_79810, XP_784596.3, NP_001116986.1,XP_785779.2) (Illies et al. 2002,Mann et al, 2010, Mann et al., 2008, Todgham & Hofmann, 2009, Stumpp et al., 2011)	Membrane
No consensus homologue name 1	A. millepora (JR989918, JR997520, JT012363) (Moya et al., 2012)	C. gigas (EKC33148.1) (Zhang et al., 2012); L. gigantea (lotgi69892) (Mann et al., 2012)	S. purpuratus (XP_785644, XP_786061) (Mann et al., 2010)	Membrane
No consensus homologue name 2	-	C. gigas (EKC30911.1) (Zhang et al., 2012); L. gigantea (lotgi116834) (Mann et al., 2012)	S. purpuratus (XP_003724791.1) (Mann et al., 2010)	Extracellular/membrane
Nucleobindin	-	L. gigantea (lotgi121860) (Mann et al., 2012)	S. purpuratus (XP_003723916.1) (Mann et al., 2008)	Membrane
Osteonectin	-	L. gigantea (lotgi109908) (Mann et al., 2012)	S. purpuratus (SPU028275) (Todgham & Hofmann, 2009)	Extracellular
Pancreatic lipase-related	A. millepora (JT011283) (Moya et al., 2012)	L. gigantea (lotgi98299, lotgi98300, lotgi102397, lotgi109426) (Mann et al., 2012)	-	Extracellular/membrane
Peptidyl-glycine alpha-amidating monooxygenase	-	L. gigantea (lotgi204047) (Mann et al., 2012)	S. purpuratus (XP_784943.3) (Mann et al., 2010)	Extracellular/membrane
Peptidyl prolyl isomerase	-	L. gigantea (lotgi192237, lotgi238515) (Mann et al., 2012)	S. purpuratus (XP_785999.1) (Mann et al., 2010)	Membrane
Perlwapin/prismalin/molluscan shell prism nacre protein/shematrin/some collagens	Acropora millepora (JR981811) (Moya et al., 2012)	P. fucata (BAE93433, BAE93434, BAE93435, BAE93438, BAE93439, BAD27406, AB159512, ACJ06766) (Yano et al., 2006, Suzuki et al., 2004, Sudo et al., 1997, Zhang et al., 2003, Evans, 2012, Kong et al., 2009); P. margaritifera (90c_3996_3, 90c_51_2, 90c_600_4, 90c_334_6, 90c_148_5, 90c_441_3, 90c_1350_1, 90c_942_2, 90c_3172_4, 90c_19664_1, 90c_8234_1, 90c_86_6) (Joubert et al., 2010); H. laevigata (P84…	S. purpuratus (SPU009076, SPU015708, SPU003768, SPU022116, NP_999676, (Mann et al., 2010, Todgham and Hofmann, 2009)	Other
Peroxidasin	A. millepora (JT009428) (Moya et al., 2012)	L. gigantea (lotgi99791, lotgi99852) (Mann et al., 2012)	S. purpuratus (XP_797821) (Mann et al., 2010)	Extracellular
Ran **	-	C. gigas (EKC36560.1) (Zhang et al., 2012); C. gigas (lotgi104069) (Mann et al., 2012)	S. purpuratus (XP_786730.1) (Mann et al., 2008, Mann et al., 2010)	Nuclear Region
Ras-like GTPase/Rab	A. millepora (JT014391) (Moya et al., 2012, Ramos-Silva et al., 2013)	L. gigantea (lotgi222012, lotgi201174, lotgi226838, lotgi199128, lotgi230301, lotgi205560, lotgi230007, lotgi198201, lotgi187701, lotgi223383, lotgi193895, lotgi225073, lotgi207113) (Mann et al., 2012)	S. purpuratus (XP_783878, XP_781611, XP_785316.2, NP_001116984, NP_001229596.1) (Mann et al., 2008b, Mann et al., 2010)	Membrane
Ribosomal protein **	-	L. gigantea (lotgi121932, lotgi237709, lotgi2099786, lotgi223917) (Mann et al., 2012)	S. purpuratus (XP_794024.2_NP_001229580.1, XP_798304.1) (Mann et al., 2008)	Nuclear Region
SM30/SM32/SM50	-	L. gigantea (lotgi77105) (Mann et al., 2012)	S. purpuratus (NP_999775.1, NP_999803.1, AF519416.1, NP_999766.1, AAB60620.1, AAA30070.1, XP_79721.1, XP796701.1) (Mann et al., 2008, Stumpp et al., 2011, Mann et al., 2010); P. lividus (CAD56481.1, AM569342.1) (Martin et al., 2011)	Extracellular
Synthenin	-	L. gigantea (lotgi186095) (Mann et al., 2012)	S. purpuratus (XP_783994.2) (Mann et al., 2010)	No Usable GO
Thioester-containing protein	-	C. gigas (EKC28380.1) (Zhang et al., 2012); L. gigantea (lotgi211452, lotgi162872) (Mann et al., 2012)	S. purpuratus (XP_784747.3)(Mann et al., 2010)	Extracellular
Thioredoxin peroxidase	-	L. gigantea (lotgi123611, lotgi150310, lotgi183148) (Mann et al., 2012)	S. purpuratus (XP_784460.3, XP_786503.2) (Mann et al., 2008, Mann et al., 2010)	Other
Transferrin	-	L. gigantea (lotgi234865) (Mann et al., 2012)	S. purpuratus (XP_786179.3) (Mann et al., 2010)	Extracellular
Tubulin	S. pistillata (KC479168) (Drake et al., 2013)	C. gigas (EKC35235.1) (Zhang et al., 2012); L. gigantea (lotgi197703, lotgi223558) (Mann et al., 2012)	S. purpuratus (XP_795696, XP_791790, XP_782388) (Mann et al., 2010)	Microtubules
Ubiquitin	S. pistillata (KC479165) (Drake et al., 2013)	P. fucata (AET80727) (Fang et al., 2012); L. gigantea (lotgi126004, lotgi177660) (Mann et al., 2012)	S. purpuratus (P23398, XP_789778) (Mann et al., 2010)	Membrane
Uncharacterized 1	A. millepora (JT020644, JR998853) (Moya et al., 2012)	L. gigantea (lotgi89037) (Mann et al., 2012)	-	Extracellular
Uncharacterized 2	-	L. gigantea (lotgi203811) (Mann et al., 2012)	S. purpuratus (XP_003729021.1, XP_801877.1) (Mann et al., 2010)	No Usable GO
Uncharacterized 3	-	L. gigantea (lotgi196407) (Mann et al., 2012)	S. purpuratus (XP_786023.2) (Mann et al., 2010)	Other
Usherin	A. millepora (JR980984) (Moya et al., 2012)	C. gigas (EKC33039.1) (Zhang et al., 2012)	-	No Usable GO
Voltage dependent anion channel **	-	L. gigantea (lotgi168464) (Mann et al., 2012)	S. purpuratus (XP_780266.1) (Mann et al., 2008)	Mitochondria
von Willebrand factor D	A. millepora (JT019923.1, JT012539.1, JT006743.1) (Moya et al., 2012)	C. gigas (EKC19252.1) (Zhang et al., 2012)	-	Extracellular/membrane

## Sheet: References
Drake, J. L., Mass, T., Haramaty, L., Zelzion, E., Bhattacharya, D. & Falkowski, P. G. 2013. Proteomic analysis of skeletal organic matrix from the stony coral Stylophora pistillata. Proceedings of the National Academy of Sciences 110(10): 3788-3793.
Evans, J. S. 2012. Aragonite-associated biomineralization proteins are disordered and contain interactive motifs. Bioinformatics 28(24): 3182-3185.
Fang, D., Pan, C., Lin, H., Lin, Y., Xu, G., Zhang, G., Wang, H., Xie, L. & Zhang, R. 2012. Ubiquitylation functions in the calcium carbonate biomineralization in the extracellular matrix. PLoS ONE 7(4): e35715.
Hasegawa, Y. & Uchiyama, K. 2005. cDNA clonings of shell matrix proteins from scallop shell. Fish Sci 71(5): 1174-1178.
Kong, Y., Jing, G., Yan, Z., Li, C., Gong, N., Zhu, F., Li, D., Zhang, Y., Zheng, G., Wang, H., et al. 2009. Cloning and Characterization of Prisilkin-39, a Novel Matrix Protein Serving a Dual Role in the Prismatic Layer Formation from the Oyster Pinctada fucata. J Biol Chem 284(16): 10841-10854.
Joubert, C., Piquemal, D., Marie, B., Manchon, L., Pierrat, F., Zanella-Cleon, I., Cochennec-Laureau, N., Gueguen, Y. & Montagnani, C. 2010. Transcriptome and proteome analysis of Pinctada margaritifera calcifying mantle and shell: Focus on biomineralization. BMC Genomics 11(1): 613.
Li, S., Xie, L., Ma, Z. & Zhang, R. 2005. cDNA cloning and characterization of a novel calmodulin-like protein from pearl oyster Pinctada fucata. FEBS J 272(19): 4899-4910.
Mann, K., Poustka, A. & Mann, M. 2008. The sea urchin (Strongylocentrotus purpuratus) test and spine proteomes. Proteome science 6(1): 22.
Mann, K., Poustka, A. & Mann, M. 2008. In-depth, high-accuracy proteomics of sea urchin tooth organic matrix. Proteome science 6(1): 33.
Mann, K., Wilt, F. H. & Poustka, A. J. 2010. Proteomic analysis of sea urchin (Strongylocentrotus purpuratus) spicule matrix. Proteome Science 8: 33.
Mann, K., Edsinger-Gonzales, E. & Mann, M. 2012. In-depth proteomic analysis of a mollusc shell: acid-soluble and acid-insoluble matrix of the limpet Lottia gigantea. Proteome science 10(1): 1-18.
Marie, B., Marie, A., Jackson, D., Dubost, L., Degnan, B., Milet, C. & Marin, F. 2010. Proteomic analysis of the organic matrix of the abalone Haliotis asinina calcified shell. Proteome science 8(1): 54.
Martin, S., Richier, S., Pedrotti, M.-L., Dupont, S., Castejon, C., Gerakis, Y., Kerros, M.-E., Oberhänsli, F., Teyssié, J.-L., Jeffree, R., et al. 2011. Early development and molecular plasticity in the Mediterranean sea urchin Paracentrotus lividus exposed to CO2-driven acidification. The Journal of Experimental Biology 214(8): 1357-1368.
Moya, A., Huisman, L., Ball, E. E., Hayward, D. C., Grasso, L. C., Chua, C. M., Woo, H. N., Gattuso, J. P., Forêt, S. & Miller, D. J. 2012. Whole transcriptome analysis of the coral Acropora millepora reveals complex responses to CO2-driven acidification during the initiation of calcification. Mol Ecol 21(10): 2440-2454.
Ramos-Silva, P., Kaandorp, J., Huisman, L., Marie, B., Zanella-Cleon, I., Guichard, N., Miller, D. J. & Marin, F. 2013. The skeletal proteome of the coral Acropora millepora: The evolution of calcification by cooption and domain shuffling. Mol Biol Evol.
Sarashina, I. & Endo, K. 1998. Primary structure of a soluble matrix protein of scallop shell: implications for calcium carbonate biomineralization. American Mineralogist 83: 1510-1515.
Sarashina, I. & Endo, K. 2001. The complete primary structure of molluscan shell protein 1 (MSP-1), an acidic glycoprotein in the shell matrix of the scallop Patinopecten yessoensis. Mar Biotechnol 3(4): 362-369.
Stumpp, M., Dupont, S., Thorndyke, M. C. & Melzner, F. 2011. CO2 induced seawater acidification impacts sea urchin larval development II: Gene expression patterns in pluteus larvae. Comparative Biochemistry and Physiology Part A: Molecular & Integrative Physiology 160(3): 320-330.
Sudo, S., Fujikawa, T., Nagakura, T., Ohkubo, T., Sakaguchi, K., Tanaka, M., Nakashima, K. & Takahashi, T. 1997. Structures of mollusc shell framework proteins. Nature 387(6633): 563-564.
Suzuki, M., Murayama, E., Inoue, H., Ozaki, N., Tohse, H., Kogure, T. & Nagasawa, H. 2004. Characterization of Prismalin-14, a novel matrix protein from the prismatic layer of the Japanese pearl oyster (Pinctada fucata). Biochem J 382(1): 205-213.
Todgham, A. E. & Hofmann, G. E. 2009. Transcriptomic response of sea urchin larvae Strongylocentrotus purpuratus to CO2-driven seawater acidification. J Exp Biol 212(16): 2579-2594.
Treccani, L., Mann, K., Heinemann, F. & Fritz, M. 2006. Perlwapin, an Abalone Nacre Protein with Three Four-Disulfide Core (Whey Acidic Protein) Domains, Inhibits the Growth of Calcium Carbonate Crystals. Biophys J 91(7): 2601-2608.
Xuan Ri, S., Hideyuki, K. & Koretaro, T. 2007. Characterization of molecular species of collagen in scallop mantle. Food Chem 102(4): 1187-1191.
Yano, M., Nagai, K., Morimoto, K. & Miyamoto, H. 2006. Shematrin: A family of glycine-rich structural proteins in the shell of the pearl oyster Pinctada fucata. Comparative Biochemistry and Physiology Part B: Biochemistry and Molecular Biology 144(2): 254-262.
Zhang, Y., Xie, L., Meng, Q., Jiang, T., Pu, R., Chen, L. & Zhang, R. 2003. A novel matrix protein participating in the nacre framework formation of pearl oyster, Pinctada fucata. Comparative Biochemistry and Physiology Part B: Biochemistry and Molecular Biology 135(3): 565-573.
Zhang, G., Fang, X., Guo, X., Li, L., Luo, R., Xu, F., Yang, P., Zhang, L., Wang, X., Qi, H., et al. 2012. The oyster genome reveals stress adaptation and complexity of shell formation. Nature 490(7418): 49-54.
