# Supplementary material for: The evolution and future of carbonate precipitation in marine invertebrates: Witnessing extinction or documenting resilience in the Anthropocene?
Source: Oxford University Press journal article supplement (doi:10.12952/journal.elementa.000026), 2014-01-01
Supplement: elementa_000026_s002.xlsx [file elementa_000026_s002.xlsx]

## Sheet: readme
Table S2. Proteins from coral, mollusk, and sea urchin direct COM sequencing, RT-PCR, or GO and KEGG annotation. 1076 proteins, including redundancy when noted by multiple sources, reduced to 1031 non-redundant sequences.

## Sheet: Sequence Info
Protein Name	Cluster#/30%	Group #	Type	Reference	Genus	Species	Coral/Mollusk/Echinoderm	ID1	detection type
Cluster000783		0	same as jt010134.1, jr979981; ECR	Moya et al. 2012	Acropora	millepora	C	JT010134
Cluster050768		0	same as jt010134.1, jt013839.1; ECR	Moya et al. 2012	Acropora	millepora	C	JR979981
Cluster050003		0	same as jt013839, jr979981; ECR	Moya et al. 2012	Acropora	millepora	C	JT013839
Cluster005744	12	0	same as jt002642; ECR	Moya et al. 2012	Acropora	millepora	C	JR973087
Cluster020987		0	same as jt973087; ECR	Moya et al. 2012	Acropora	millepora	C	JT002642
Cluster020227		0	nothing at 75%; ECR	Moya et al. 2012	Acropora	millepora	C	JR986374
Cluster015890		0	nothing at 75%; ECR	Moya et al. 2012	Acropora	millepora	C	JR986173.1
5955	12	0	notch; nothing at 75%; Sp-Notchl1/similar to notch ligand	Mann et al. 2010	Strongylocentrotus	purpuratus	E	ref|XP_780602.3|	LC-MS
00152 1(a)	12	0	notch; nothing at 75%. Similar to notch; domains: EGF; shares 1 peptide with Glean3:13510 (Sp-NotchL_4)	Mann et al. 2010	Strongylocentrotus	purpuratus	E	P_003723785.1	LC-MS
lotgi1|230171	0	0	notch	Mann et al. 2012	Lottia	gigantea	M	lotgi1|230171	LC-MS/MS
19987	12	0	nothing at 75%; Hypothetical protein	Mann et al. 2010	Strongylocentrotus	purpuratus	E	ref|XP_001179074.2	LC-MS
N66		1	n66/33/44	Kono et al. 2000	Pinctada	maxima	M	PIR; JC7210; replaced by Q9NL38.1
Contig_90c_2232_6		1	n66/33/44; N33	Joubert et al. 2010	Pinctada	margaritifera	M	not publically available
Contig_90c_187_3		1	n66/33/44; N44	Joubert et al. 2010	Pinctada	margaritifera	M	not publically available
Contig_90c_221_4	1	1	nothing at 75%; N66 matrix protein	Joubert et al. 2010	Pinctada	margaritifera	M	not publically available
Nacrein		1	nacrein; nothing at 75%	Miyamoto et al. 1996	Pinctada	fucata	M	trEMBL; Q27908
IMSP-4	1	1	nothing at 75%; Kazal-like	Marie et al. 2011 Mar Biotechnol	Venerupis	philippinarum	M	AM875391; AM874135; TKSDDSSQTISLLDVFK	MS/MS
Nacrein	1	1	nacrein	Miyamoto et al. 1996, Yano et al. submitted	Turbo	marmoratus	M	AB073680
Skeletal acidic Asp-rich Protein 1 (SAARP 1)	2	2	ecmp/saarp; same as ecmp67; 67kda_lobophytum	Ramos-Silva et al. 2013 Mar Biol Evol	Acropora	millepora	C	JT001945	LC-MS/MS
ECMP-67		2	ecmp/saarp; same as jt001945; 67kda_lobophytum	Rahman et al. 2011 JBC Papers	Lobophytum	crassum	C	Nterm	N-terminal; DELNKKVDSDGTISDDGVVA
67kDa		2	ecmp/saarp; same as jt001945; ecmp67	Rahman et al. 2005J. Exp Mar. Biol. Ecol.	Lobophytum	crassum	C	Nterm	N-terminal; DELNKKVDSETISDDGV
ECMP-67		2	ecmp/saarp; same as jt001945; ecmp67	Rahman et al 2011 JBC	Lobophytum	crassum.	C	Nterm	N-terminal; DELNKKVDSDGTISDDGVVA
g11187		2	carp4; nothing at 75%	Drake et al. 2013	Stylophora	pistillata	c	KC493647	LC-MS/MS
55kDa		2	nothing at 75%;	Puverel et al. 2005 Comp. Biochem. Physiol. B.	Stylophora	pistillata	C	Nterm	N-terminal; VGEFLDLK IMIRVDDDDDDDDDDDDDDDDDDDDDDDDDDDDDDDDDDDD
Skeletal acidic Asp-rich Protein 2 (SAARP2)		2	sap; nothing at 75%;	Ramos-Silva et al. 2013 Mar Biol Evol	Acropora	millepora	C	JR991407	LC-MS/MS
g18472		2	integrin; nothing at 75%	Drake et al. 2013	Stylophora	pistillata	c	KC479167	LC-MS/MS
Acidic skeletal organic matrix protein (Acidic SOMP)	2	2	nothing at 75%;	Ramos-Silva et al. 2013 Mar Biol Evol	Acropora	millepora	C	JR972076	LC-MS/MS
g1532	2	2	carp5; nothing at 75%	Drake et al. 2013	Stylophora	pistillata	c	KC493648	LC-MS/MS
Secreted acidic protein 2 (Amil-SAP2)	2	2	sap; nothing at 75%;	Ramos-Silva et al. 2013 Mar Biol Evol	Acropora	millepora	C	JR983041	LC-MS/MS
g13727		3	actin; same as p6, p7, np_999634	Drake et al. 2013	Stylophora	pistillata	c	KC342193	LC-MS/MS
g4601		3	actin; same as p6; same as np999634	Drake et al. 2013	Stylophora	pistillata	c	KC342191	LC-MS/MS
GLEAN3_09481		3	actin; same as p6; same as p7	Mann et al. 2008 Proteome Sci	Strongylocentrotus	purpuratus	E	ref|NP_999634.1	LC-MS; AGFAGDDAPR DLTDYLMK DLYANTVLSGGSTMFPGIADR DSYVGDEAQSK EITALAPPTMK GYSFTTTAER HQGVMVGMGQK IIAPPER QEYDESGPSIVHR SYELPDGQVITIGNER
Lotgi1|202971		3	actin	Mann et al. 2012	Lottia	gigantea	M	lotgi1\202971	LC-MS/MS
g11666		3	actin; same as p7; same as np_999634	Drake et al. 2013	Stylophora	pistillata	c	KC149520	LC-MS/MS
Cluster032202		4	same as cluster022178; same as jr988690; ECR	Moya et al. 2012	Acropora	millepora	C	JT001283.1
Cluster022178		4	same as cluster032202; same as jr988690; ECR	Moya et al. 2012	Acropora	millepora	C	JT013475
EKC37595.1	4	4	fibrogenin c	Zhang et al. 2012	Crassostrea	gigas	M	EKC37595.1	LC-MS/MS
EKC37598.1	4	4	fibrogenin c	Zhang et al. 2012	Crassostrea	gigas	M	EKC37598.1	LC-MS/MS
Sp_16		5	p16	Illies and Ettensohn 2002, Dev. Genes Evol.	Strongylocentrotus	purpuratus	E	AF519415.1
P16 SPU_018408 –1.55 r –1.06 PMC-specific protein essential for skeletal rod elongation		5	p16; same as bak74802; same as aay59533	Todgham & Hofmann 2009 J. exp. Biol..	Strongylocentrotus	purpuratus	E		values are upper and lower limit of fold change for 540ppm versus 380ppm; microarray analysis; larvae; 40hr
UTMP19		5	p16; same as glean3_18408; bak74802.1	Alvares et al. 2009 J. Biol. Chem	Lytechinus	variegatus	E	AAY59533.1	teeth; N-terminal, cDNA
p16/biomineralzation protein		5	p16; same as glean3_18408; same as aay59533	Shiomi et al.	Hemicentrotus	pulchierrimus	e	BAK74802.1
Pl-p16		5	nothing at 75%;	Costa et al 2012, Dev Genes Evol	Paracentrotus	lividus	E	FR693763
UTMP16		6	p16; same as acu00092.1	Alvares et al. 2009 J. Biol. Chem	Lytechinus	variegatus	E	GQ340974.1	teeth; N-terminal, cDNA
Pl-p19		6	p16; utmp16; p19; sp19; same as acu00092.1	Costa et al 2012, Dev Genes Evol	Paracentrotus	lividus	E	FR693764
GLEAN3_04136		6	sp19; same as af519413, af519414	Mann et al. 2010 Proteome Sci	Strongylocentrotus	purpuratus	E	ref|NP_999812.1|	test, LC-MS; IEEGQASGEGAGE
GLEAN3_04136		6	sp19; same as af519413, af519414	Mann et al. 2010 Proteome Sci	Strongylocentrotus	purpuratus	E	ref|NP_999812.1|	test, LC-MS; IEEGQASGEGAGE
SP19		6	sp19; same as np999812, af519414	Illies and Ettensohn 2002, Dev. Genes Evol.	Strongylocentrotus	purpuratus	E	AF519413.1
P19 SPU_004136 –1.65 r +1.05 PMC-specific protein		6	p19	Todgham & Hofmann 2009 J. exp. Biol..	Strongylocentrotus	purpuratus	E		values are upper and lower limit of fold change for 540ppm versus 380ppm; microarray analysis; larvae; 40hr
N16 family		8	n16	Samata et al. 1999, Miyashita et al. 2000	Pinctada	fucata	M	trEMBL; O97048
N16-1		8	n16	Samata et al 1999 FEBS letter	Pinctada	fucata	M	AB023067	N-terminal
N16-2		8	n16	Samata et al 1999 FEBS letter	Pinctada	fucata	M	AB023067	N-terminal
N16-3		8	n16	Samata et al 1999 FEBS letter	Pinctada	fucata	M	AB023067	N-terminal
N16-v2		8	n16	Nogawa,C et al 2012 gene	Pinctada	fucata	M	AB612113	cDNA
N16-v1		8	n16	Nogawa,C et al 2012 gene	Pinctada	fucata	M	AB612114	cDNA,
N16-s7		8	n16	Nogawa,C et al 2012 gene	Pinctada	fucata	M	AB612117	cDNA,
N16-s6		8	n16	Nogawa,C et al 2012 gene	Pinctada	fucata	M	AB612116	cDNA,
N16-s1		8	n16	Nogawa,C et al 2012 gene	Pinctada	fucata	M	AB612115	cDNA,
N16-f1		8	n16	Nogawa,C et al 2012 gene	Pinctada	fucata	M	AB612112	cDNA,
N16.1 Swiss-Prot Q9TVT2.1 108 frame		8	n16/perlin	Evans 2012 Bioinformatics			M		aragonite; Bioinformatics
N16.2 Swiss-Prot Q9UAH3.1 106 frame		8	n16/perlin	Evans 2012 Bioinformatics			M		aragonite; Bioinformatics
N16.3 Swiss-Prot Q9TW98.1 108 frame		8	n16/perlin	Evans 2012 Bioinformatics			M		aragonite; Bioinformatics
N16.5 GenBank BAA75626.1 106 frame		8	n16/perlin	Evans 2012 Bioinformatics			M		aragonite; Bioinformatics
N14		8	n14/perlin	Kono et al. 2000	Pinctada	maxima	M	PIR; JC7211, preplaced by Q9NL39.1
N14 GenBank BAA90539.1 114 frame		8	n14/perlin	Evans 2012 Bioinformatics			M		aragonite; Bioinformatics
Perlin Swiss-Prot Q14WA6.3 114 frame		8	n14/perlin	Evans 2012 Bioinformatics			M		Bioinformatics
Contig_90c_12451_4		8	n14/perlin; Perline matrix protein	Joubert et al. 2010	Pinctada	margaritifera	M	ABG24165
Contig_90c_5769_1		9	KRMP 2/krmp	Joubert et al. 2010	Pinctada	margaritifera	M
Contig_90c_1483_2		9	KRMP 8/krmp	Joubert et al. 2010	Pinctada	margaritifera	M	ABP57446
Contig_90c_2402_1		9	KRMP 9/KRMP	Joubert et al. 2010	Pinctada	margaritifera	M	ABP57447
Contig_90c_707_5		9	krmp; KRMP 5	Joubert et al. 2010	Pinctada	margaritifera	M	ABO87298
Contig_90c_26454_2		9	krmp/prismin; Prismin_2	Joubert et al. 2010	Pinctada	margaritifera	M
Contig_90c_2458_5		9	krmp/prismin/KRMP 10	Joubert et al. 2010	Pinctada	margaritifera	M	ABP57448
Contig_90c_81_3		9	krmp/prismin/KRMP 7	Joubert et al. 2010	Pinctada	margaritifera	M	ABP57445
pearlin		9	pearlin	Miyashita et al. 2000	Pinctada	fucata	M	trEMBL; O97048
KRMP family 4		9	KRMP	Zhang et al. 2006	Pinctada	fucata	M	BAH78734.1
KRMP family 3		9	KRMP	Zhang et al. 2006	Pinctada	fucata	M	BAH78729.1
KRMP family 2		9	KRMP	Zhang et al. 2006	Pinctada	fucata	M	BAH78726.1
KRMP family 1		9	KRMP	Zhang et al. 2006	Pinctada	fucata	M	BAH78719.1
lotgi1|142790	9	9	uncharacterized protein	Mann et al. 2012	Lottia	gigantea	M	lotgi1|142790	LC-MS/MS
g13890		10	mam; same as jr994474	Drake et al. 2013	Stylophora	pistillata	c	KC479173	LC-MS/MS
MAM and LDL-receptor domain- containing protein 2		10	mam; same as p36	Ramos-Silva et al. 2013 Mar Biol Evol	Acropora	millepora	C	JR994474	LC-MS/MS
MAM and LDL-receptor domain- containing protein 1		10	mam; nothing at 75%	Ramos-Silva et al. 2013 Mar Biol Evol	Acropora	millepora	C	JT011118	LC-MS/MS
g6066		10	mam; nothing at 75%	Drake et al. 2013	Stylophora	pistillata	c	KC342199	LC-MS/MS
g1714		10	mam; nothing at 75%	Drake et al. 2013	Stylophora	pistillata	c	KC479172	LC-MS/MS
Cluster011788	14	14	same as jt012539; ECR	Moya et al. 2012	Acropora	millepora	C	JT019923.1
Cluster017913		14	same as jt019923; ECR	Moya et al. 2012	Acropora	millepora	C	JT012539.1
Cluster020936	14	14	nothing at 75%; ECR	Moya et al. 2012	Acropora	millepora	C	JT006743.1
EKC19252.1	14	14	vwf D	Zhang et al. 2012	Crassostrea	gigas	M	EKC19252.1	LC-MS/MS
GLEAN3_00439		15	hemicentin; same as xp_003727369.1	Mann et al. 2008b Proteome Sci	Strongylocentrotus	purpuratus	E	SRRSEGCSYHTTRYFYGGGGGGGHLALFSPYHIRRDVLRNRDVSGGASAGGSAGRGGTGQ	LC-MS;
00469 1a,b,c		15	hemicentin; same as xp_794971.3; Sp-Igcamr/similar to novel hemicentin/similar to cell adhesion molecule OCAM	Mann et al. 2010	Strongylocentrotus	purpuratus	E	ICQDEVHCSGHGSYSVQQQVCTCNAGHYGLNCAYKCNASITCLGHGQCSANGGCVCDPGY	LC-MS
05238 1a,c		16	plexin domain; same as xp_001199865.2; Sp-Plxdc2 (plexin domain-containing 2)	Mann et al. 2010	Strongylocentrotus	purpuratus	E	VGYRCEHRCNATRDCHGNGRCSVTGKCVCDSCFRDDCKLECSGNGDCIGKKCKCNACYLG	LC-MS
GLEAN3_05238		16	plexin domain; same as xp_794103.3	Mann et al. 2008b Proteome Sci	Strongylocentrotus	purpuratus	E	THCHSLCSGHGMCSNDSCVCEEGWKGAFCEVPKCPNDCSGNGICNSALLTCFCNPGWTGD	LC-MS;
GLEAN3_04721		17	ubiquitin; same as p25	Mann et al. 2008b Proteome Sci	Strongylocentrotus	purpuratus	E	DCSEPDCPGEPDCFNRGVCAVINETISKCVNCSAGWMGPACNDPCVHGFQEPMDSGFCKC	LC-MS;
21496 1a,b,c,d		17	ubiquitin; same as p25; Sp-Polyq/ubiquitin; shares petide set with Glean3:04721 (Sp-Rps27a/ribosomal protein S27a), Glean3:18079 (Sp-Drps27a) and Glean3:15276 (Sp-Ubq/RL40fp)	Mann et al. 2010 Proteome	Strongylocentrotus	purpuratus	E	DACWAGKGCDALCMGRGTCAQSGICDCFPLQGWRGDVCQIPGCPGIGLDCTGHGDCNSAT	LC-MS
g11220		17	ubiquitin; same as sp|P23398.2|UBIQP_STRPU	Drake et al. 2013	Stylophora	pistillata	c	HECTCNPGWAGVGCEIPDCPGAPNCYNRGYCNASIEPPQCQNCSKGWMGPACADPCQFGE	LC-MS/MS
GLEAN3_04721		17	ubiquitin; same as aet_80727.1	Mann et al. 2008b Proteome Sci	Strongylocentrotus	purpuratus	E	QIPMDSGQCNCWPGYSGVGCDSECSEHGKVVNNKCVCDLGWRGDLCDNPGCPGDGSDCTG	LC-MS; TITLEVEPSDSIENVK TLSDYNIQK
lotgi1|126004		17	ubiquitin	Mann et al. 2012	Lottia	gigantea	m	HGVCNAATHVCTCNEGWAGIGCEIPDCPGTPNCFLRGICNASLDPPRCQNCTKGWMGPAC	LC-MS/MS
lotgi1|177660	17	17	NEDD8, ubiquitin	Mann et al. 2008 Proteome Sci	Lottia	gigantea	m	NDPCTNGQQIPMNSGNCVCEPGWVGVGCDSECSEHGRIVSDICQCDVGWRGTYCENPGCP	LC-MS/MS
UBIQUITIN		17	ubiquitin; same as xp_789778.1	Fang et al 2012, PlusOne	PINCTADA	fucata	M	GNGTDCSGHGKCNSATHKCTCTNGWTGDGCHIPDCPGNPNCANRGYCNATTDPPVCTNCL
MAM and fibronectin containing protein 2		18	mam; same as jt013217	Ramos-Silva et al. 2013 Mar Biol Evol	Acropora	millepora	C	SGWMGP	LC-MS/MS
MAM and fibronectin- containing protein		18	mam; same as jt016410	Ramos-Silva et al. 2013 Mar Biol Evol	Acropora	millepora	C	JT013217	LC-MS/MS
BMP2/5		20	bone morphogenic protein; same as eu785981.1	Zocolla et al. 2009	Acropra	sp.	c	EU785982	cDNA
BMP2/4		20	bone morphogenic protein; same as eu785982	Zocolla et al. 2009	Stylophora	pistillata	c	EU785981.1	cDNA
PfN23		27	pfmg	Fang et al 2012, J. Biol. Chem.	PINCTADA	fucata	M	JN995665
PFMG8 GenBank AZZ76262.1 202 pearl		27	pfmg	Evans 2012 Bioinformatics			M		Bioinformatics
Contig_90c_1789_5		27	nothing at 75%; Mantle gene 8	Joubert et al. 2010	Pinctada	margaritifera	M	not publically available
Contig_90c_783_6		30	calmodulin	Joubert et al. 2010	Pinctada	margaritifera	M	not publically available
GLEAN3_05032		30	calmodulin; same as 90c_783_6	Mann et al. 2008b Proteome Sci	Strongylocentrotus	purpuratus	E	ref|XP_003726932.1|	LC-MS;
CaLP		30	calmodulin; nothing at 75%; calmodulin-like	Li et al. 2005	Pinctada	fucata	M	AY663847.1
lotgi1|148903		30	calmodulin	Mann et al. 2012	Lottia	gigantea	m	lotgi1|148903	LC-MS/MS
EKC42677.1	30	30	calmodulin	Zhang et al. 2012	Crassostrea	gigas	M	EKC42677.1	LC-MS/MS
lotgi1|219843	30	30	calmodulin	Mann et al. 2012	Lottia	gigantea	m	lotgi1|219843	LC-MS/MS
Contig_90c_18304_5		30	nothing at 75%; Calmodulin	Joubert et al. 2010	Pinctada	margaritifera	M
Prismin-2		34	prismin; same as baf93505	Takagi & Miyashita 2010	Pinctada	fucata	M	BAG28185.1
Prismin-1		34	prismin; same as bag28185	Takagi & Miyashita 2010	Pinctada	fucata	M	BAF93505.1
Aspein		35	aspein	Tsukamoto et al. 2004	Pinctada	fucata	M	BAD00044.1
Aspein	35	35	aspein	Tsukamoto et al 2004, Biochemical and Biophysical Research Communications	Pinctada	fucata	M	AB094512
292259_2670_2456_1		35	asprich; Aspein (shell matrix protein)	Joubert et al. 2010	Pinctada	margaritifera	M
Contig_90c_554_6		35	asprich; Asprich 1	Joubert et al. 2010	Pinctada	margaritifera	M
Asprich family		35	asprich	Gotliv et al. 2005	Atrina	rigida	M	AAU04815.1
Asprich family		35	asprich	Gotliv et al. 2005	Atrina	rigida	M	AAU04814.1
Asprich family		35	asprich	Gotliv et al. 2005	Atrina	rigida	M	AAU04813.1
Asprich family		35	asprich	Gotliv et al. 2005	Atrina	rigida	M	AAU04809.1
Asprich family		35	asprich	Gotliv et al. 2005	Atrina	rigida	M	AAU04808.1
Asprich family		35	asprich	Gotliv et al. 2005	Atrina	rigida	M	AAU04812.1
Asprich family		35	asprich	Gotliv et al. 2005	Atrina	rigida	M	AAU04810.1
Asprich family		35	asprich	Gotliv et al. 2005	Atrina	rigida	M	AAU04807.1
Asprich family		35	asprich	Gotliv et al. 2005	Atrina	rigida	M	AAU04806.1
Pif177		35	pif177/pif80/pif97	Suzuki et al. 2009	Pinctada	fucata	M	BAH97338.1
Pif80	35	35	pif177/pif80/pif97	Suzuki et al. 2009	Pinctada	fucata	M	AB236929	calciun carbonate-binding assay and cDNA
Pif97		35	pif177/pif80/pif97	Suzuki et al. 2009	Pinctada	fucata	M	AB236929
Pif177		35	pif177/pif80/pif97	Suzuki et al. 2009	Pinctada	fucata	M	AB236929
Pif97 Swiss-Prot C7G0B5.1 525 frame		35	pif177/pif80/pif97	Evans 2012 Bioinformatics			M		Bioinformatics
Pif80 Swiss-Prot C7G0B5.1 460 frame		35	pif177/pif80/pif97	Evans 2012 Bioinformatics			M		Bioinformatics
Contig_90c_71_3		35	nothing at 75%; Pif 177	Joubert et al. 2010	Pinctada	margaritifera	M	not publically available
Asprich family		35	asprich	Gotliv et al. 2005	Atrina	rigida	M	AAU04811.1
no name4		37	trefoil factor; also in hayward >90%; Trefoil factor	Kaniewska et al. 2012	Acropora	millepora	C	GS01IA07; DY585976.1
no name5		37	trefoil factor; also in hayward >90%; Trefoil factor	Kaniewska et al. 2012	Acropora	millepora	C	GS01JB11; DY586071.1
no name6		37	trefoil factor; also in hayward >90%; Trefoil factor	Kaniewska et al. 2012	Acropora	millepora	C	GS01NE03; DY586752.1
no name7		37	trefoil factor; also in hayward >90%; Trefoil factor	Kaniewska et al. 2012	Acropora	millepora	C	GS01JC11
no name8		37	trefoil factor; also in hayward >90%; Trefoil factor	Kaniewska et al. 2012	Acropora	millepora	C	C012-F12
no name10		37	trefoil factor; also in hayward >90%; Trefoil factor	Kaniewska et al. 2012	Acropora	millepora	C	GS01YE05
Trefoil		37	trefoil factor; also in kaniewska	Hayward et al. 2011	Acropora	millepora	C	A93
no name9	37	37	trefoil factor; nothing at 75%; Trefoil factor	Kaniewska et al. 2012	Acropora	millepora	C	GS01JB12
Trefoil	37	37	trefoil; nothing at 75%	Hayward et al. 2011	Acropora	millepora	C	A12
MSP130-related2		38	msp130	Illies and Ettensohn 2002, Dev. Genes Evol.	Strongylocentrotus	purpuratus	E	AF519420.1
21385 1a,b,c,d	38	38	msp130; nothing at 75%; Sp-ApL/MSP130-related-2, shares 15 peptides with Glean3:16506 (Sp-Msp130r2); GPI	Mann et al. 2010 Proteome	Strongylocentrotus	purpuratus	E	ref|NP_999807.1|	LC-MS
16506 1a,b,c,d		38	msp130; nothing at 75%; Sp-Msp130r2; shares 15 peptides with Glean3:21385 (SpApl; all 15 peptides from N-terminal half!); GPI	Mann et al. 2010 Proteome	Strongylocentrotus	purpuratus	E	ref|NP_999807.1|	LC-MS
GLEAN3_16506		38	nothing at 75%;	Mann et al. 2008b Proteome Sci	Strongylocentrotus	purpuratus	E	ref|NP_999807.1	LC-MS;
GLEAN3_21385		38	nothing at 75%;	Mann et al. 2008b Proteome Sci	Strongylocentrotus	purpuratus	E	ref|NP_999807.1|	LC-MS;
GLEAN3_14869		38	nothing at 75%;	Mann et al. 2008b Proteome Sci	Strongylocentrotus	purpuratus	E	ref|NP_999807.1|	LC-MS;
GLEAN3_16506		38	nothing at 75%;	Mann et al. 2008b Proteome Sci	Strongylocentrotus	purpuratus	E	ref|NP_999807.1|	LC-MS;
GLEAN3_06387	38	38	mesenchyme specific cell surface glycoprotein/	Mann et al. 2008b Proteome Sci	Strongylocentrotus	purpuratus	E	ref|XP_784596.3	LC-MS; DQNPQGQNPNGQSPQGGVTTSR GTCSGGGNFNPTVTTLDFTK ISAIALFSVPPDGNLPIFESIHR LGNLEFSR LIFVGIDR MGPECESIEIGDVQGTK QPYTGQMGDK VGDPSLTMASTFDSQSDK VPNQGPNQGGR VSNAEMLDAFR YDLDPSPGNAR
06387 1a,b,c,d		38	mesenchyme specific cell surface glycoprotein/Sp-Msp130L (primary mesenchyme specific protein 130-like/MSP130-related-3); shares peptides with Glean3:13823 (Sp-Msp130r3); GPI	Mann et al. 2010 Proteome	Strongylocentrotus	purpuratus	E	ref|XP_798810.3|	LC-MS
13823 1a,b,c,d	38	38	mesenchyme specific cell surface glycoprotein/Sp-Msp130r3; shares peptides with Glean3:06387 (Sp-Msp130L/MSP130-related-3); GPI	Mann et al. 2010 Proteome	Strongylocentrotus	purpuratus	E	ref|XP_784596.3|	LC-MS
GLEAN3_13823		38	msp	Mann et al. 2008b Proteome Sci	Strongylocentrotus	purpuratus	E	ref|XP_798810.3|	LC-MS;
GLEAN3_13823		38	nothing at 75%;	Mann et al. 2008b Proteome Sci	Strongylocentrotus	purpuratus	E	ref|XP_784596.3	LC-MS;
GLEAN3_06387		38	nothing at 75%;	Mann et al. 2008b Proteome Sci	Strongylocentrotus	purpuratus	E	ref|XP_784596.3|	LC-MS;
MSP130-related 3 SPU_013823 –1.65 r –1.01 PMC-specific protein		38	msp130; nothing at 75%	Todgham & Hofmann 2009 J. exp. Biol..	Strongylocentrotus	purpuratus	E		values are upper and lower limit of fold change for 540ppm versus 380ppm; microarray analysis; larvae; 40 hr
GLEAN3_13821		38	msp	Mann et al. 2008b Proteome Sci	Strongylocentrotus	purpuratus	E	sp|P08472.2|M130_STRPU	LC-MS;
msp130	38	38	msp130; same as glean3_13821; same as aaa30065	Stumpp et al. 2011 Comp. Biochem. Physiol.	Strongylocentrotus	purpuratus	E	NP_001116986.1	ph7.7 7.1% dec over cont 7d; RT-PCR; larvae
13821 1a,bc,d		38	msp130; same as glean3_13821; same as aaa30065/Sp-Msp130_1; shares 14 peptides with Glean3:02088 (Sp-Msp130); GPI	Mann et al. 2010 Proteome	Strongylocentrotus	purpuratus	E	ref|NP_001116986.1|	LC-MS
GLEAN3_13821		38	msp130; same as np_001116986; same as glean3_13821	Mann et al. 2008b Proteome Sci	Strongylocentrotus	purpuratus	E	gb|AAA30065.1	LC-MS;
MSP130-related1		38	msp130	Illies and Ettensohn 2002, Dev. Genes Evol.	Strongylocentrotus	purpuratus	E	AF519419.1
13822 1a,b,c,d	38	38	msp130; nothing at 75%; Sp-Msp130r1; GPI	Mann et al. 2010 Proteome	Strongylocentrotus	purpuratus	E	ref|NP_999806.1|	LC-MS
GLEAN3_13822	38	38	nothing at 75%;	Mann et al. 2008b Proteome Sci	Strongylocentrotus	purpuratus	E	ref|NP_999806.1	LC-MS;
GLEAN3_13822	38	38	nothing at 75%;	Mann et al. 2008b Proteome Sci	Strongylocentrotus	purpuratus	E	ref|NP_999806.1|	LC-MS;
14496 1c,d	38	38	msp130; nothing at 75%; Sp-Msp130r4; GPI	Mann et al. 2010	Strongylocentrotus	purpuratus	E	ref|XP_785779.2|	LC-MS
GLEAN3_14496		38	nothing at 75%;	Mann et al. 2008b Proteome Sci	Strongylocentrotus	purpuratus	E	ref|XP_785779.2	LC-MS;
GLEAN3_14496		38	nothing at 75%;	Mann et al. 2008b Proteome Sci	Strongylocentrotus	purpuratus	E	ref|XP_785779.2|	LC-MS;
15763	38	38	msp130; nothing at 75%; Sp-Msp130r5;GPI	Mann et al. 2010	Strongylocentrotus	purpuratus	E	ref|XP_003726042.1|	LC-MS
lotgi1|190352	38	38	msp130, alkaline phosphates	Mann et al. 2012	Lottia	gigantea	M	lotgi1|190352	LC-MS/MS
MSP130 SPU_013821 –1.58 r –1.01 Primary mesenchyme cell (PMC)-specific protein		38	msp130; same as np_001116986; same as aaa30065	Todgham & Hofmann 2009 J. exp. Biol..	Strongylocentrotus	purpuratus	E		values are upper and lower limit of fold change for 540ppm versus 380ppm; microarray analysis; larvae; 40hr
perlucin		42	perlucin	Weiss et al. 2000	Haliotis	laevigata	M	swissprot; P82596
Perlucin Swiss-Prot P82596.3 155 intra		42	perlucin	Evans 2012 Bioinformatics			M		Bioinformatics
Perlucin A GenBank CBK19532.1 131 intra		42	perlucin	Evans 2012 Bioinformatics			M		Bioinformatics
Perlucin A2 GenBank CBK19533.1 131 intra		42	perlucin	Evans 2012 Bioinformatics			M		Bioinformatics
Perlucin B GenBank CBK19534.1 192 intra		42	perlucin	Evans 2012 Bioinformatics			M		Bioinformatics
Perlucin C GenBank CBK19535.1 222 intra	42	42	perlucin	Evans 2012 Bioinformatics			M		Bioinformatics
431794_3530_0210_4	42	42	nothing at 75%; Perlucin	Joubert et al. 2010	Pinctada	margaritifera	M
PFMG3 GenBank AZZ76257.1 98 pearl		42	pfmg3	Evans 2012 Bioinformatics	Pinctada	fucata	M		Bioinformatics
Contig_90c_883_3		42	nothing at 75%; Mantle gene 3	Joubert et al. 2010	Pinctada	margaritifera	M
perlucin-like	42	42	perlucin; nothing at 75%	Marie et al. 2011 J. Mol. Evol.	Mytilus	galloprovincialis	M	P86854]	TOF-MS/MS
lotgi1|235549	42	42	mannose receptor	Mann et al. 2012	Lottia	gigantea	M	lotgi1|235549	LC-MS/MS
23016 1a,b,d		43	ecm3; nothing at 75%; Sp-Frem1L/88% sequence identity to L. variegatus ECM3/FREM2	Mann et al. 2010	Strongylocentrotus	purpuratus	E	ref|XP_003724641.1|	LC-MS
01796 1a,b,(c),d		43	fras; nothing at 75%; Sp-Frem2 (Fras1-related extracellular matrix protein 2)	Mann et al. 2010	Strongylocentrotus	purpuratus	E	ref|XP_003724641.1|	LC-MS
GLEAN3_01796		43	nothing at 75%;	Mann et al. 2008b Proteome Sci	Strongylocentrotus	purpuratus	E	ref|XP_003724641.1	LC-MS; ASNPVSAIAGEDYAGISR QADSDTFFSTTK SITLDSIYFGPGSR TGDLSIESSVR VANAIGAEPFTAR
GLEAN3_23016		43	nothing at 75%;	Mann et al. 2008b Proteome Sci	Strongylocentrotus	purpuratus	E	ref|XP_003724641.1|	LC-MS;
GLEAN3_01796		43	nothing at 75%;	Mann et al. 2008b Proteome Sci	Strongylocentrotus	purpuratus	E	ref|XP_003724641.1|	LC-MS;
GLEAN3_24991		46	nothing at 75%;	Mann et al. 2010 Proteome Sci	Strongylocentrotus	purpuratus	E	ref|XP_799962.3|	test, LC-MS; ARARGPSLFGRIV
GLEAN3_24991		46	nothing at 75%;	Mann et al. 2010 Proteome Sci	Strongylocentrotus	purpuratus	E	ref|XP_799962.3|	test, LC-MS; ARARGPSLFGRIV
GLEAN3_24991		46	nothing at 75%;	Mann et al. 2010 Proteome Sci	Strongylocentrotus	purpuratus	E	ref|XP_799962.3|	teeth; LC-MS; ARARGPSLFGRIV
GLEAN3_24991		46	nothing at 75%;	Mann et al. 2010 Proteome Sci	Strongylocentrotus	purpuratus	E	ref|XP_799962.3|	teeth; LC-MS; ARARGPSLFGRIV
24991 1c		46	nothing at 75%; Hypothetical protein; N-term:N-Ac-Met1; phospho-Ser144	Mann et al. 2010	Strongylocentrotus	purpuratus	E	ref|XP_799962.3|	LC-MS
GLEAN3_24565		47	nothing at 75%;	Mann et al. 2008b Proteome Sci	Strongylocentrotus	purpuratus	E	ref|XP_784747.3|	LC-MS;
GLEAN3_24564		47	nothing at 75%;	Mann et al. 2008b Proteome Sci	Strongylocentrotus	purpuratus	E	ref|XP_784747.3|	LC-MS;
GLEAN3_24565		47	nothing at 75%;	Mann et al. 2008b Proteome Sci	Strongylocentrotus	purpuratus	E	ref|XP_784747.3|	LC-MS;
24564		47	nothing at 75%; Sp-Cd109L_2/similar to thioester-containing protein; domain: A2M_N, A2M_N_2 (α-macroglobulin)	Mann et al. 2010	Strongylocentrotus	purpuratus	E	ref|XP_784747.3|	LC-MS
24565 1a,b,c,d		47	nothing at 75%; Sp-Cd109L/similar to thioester-containing protein; domain: A2M_2 (α-macroglobulin)	Mann et al. 2010	Strongylocentrotus	purpuratus	E	ref|XP_784747.3	LC-MS
lotgi1|211452	47	47	thioester-containing protein	Mann et al. 2012	Lottia	gigantea	M	lotgi1|211452	LC-MS/MS
EKC28380.1	47	47	hypothetical protein	Mann et al. 2012	Lottia	gigantea	M	EKC28380.1	LC-MS/MS
lotgi1|162872	47	47	thioester-containing protein	Mann et al. 2012	Lottia	gigantea	M	lotgi1|162872	LC-MS/MS
GLEAN3_25926		48	nothing at 75%;	Mann et al. 2008b Proteome Sci	Strongylocentrotus	purpuratus	E	ref|XP_786421.3|	LC-MS;
GLEAN3_25927		48	nothing at 75%;	Mann et al. 2008b Proteome Sci	Strongylocentrotus	purpuratus	E	ref|XP_786421.3|	LC-MS;
25926 1(a),c		48	nothing at 75%; Hypothetical protein/similar to CG18405-PB, domain: sema (N-term); same protein as Glean3:25927?		Strongylocentrotus	purpuratus	E	ref|XP_786421.3|	LC-MS
25927 1c		48	nothing at 75%; Hypothetical protein/similar to CG18405-PB; domain: sema (C-term); same protein as Glean3:25926?	Mann et al. 2010 Proteome	Strongylocentrotus	purpuratus	E	ref|XP_786421.3|	LC-MS
CA15		49	ca15; nothing at 75%	Stumpp et al. 2011 Comp. Biochem. Physiol.	Strongylocentrotus	purpuratus	E	XP_003726289.1	ph7.7 7% inc over cont at 7d; RT-PCR; larvae
12518 1a,b,c,d		49	carbonic anhydrase; same as abe27963; Sp-Cara7LA (carbonic anhydrase)	Mann et al. 2010 Proteome	Strongylocentrotus	purpuratus	E	ref|XP_784328.2|	LC-MS
GLEAN3_12518		49	carbonic anhydrase; same as abe27963; xp_003726289	Mann et al. 2008b Proteome Sci	Strongylocentrotus	purpuratus	E	ref|XP_784328.2	LC-MS;
GLEAN3_12518		49	carbonic anhydrase; same as xp_784328;	Mann et al. 2008b Proteome Sci	Strongylocentrotus	purpuratus	E	gb|ABE27963.1|	LC-MS;
GLEAN3_17590;GLEAN3_22278		52	nothing at 75%;	Mann et al. 2010 Proteome Sci	Strongylocentrotus	purpuratus	E	ref|XP_003727648.1|	teeth; LC-MS; PSPAAPSAPRAPA
GLEAN3_22278		52	nothing at 75%;	Mann et al. 2010 Proteome Sci	Strongylocentrotus	purpuratus	E	ref|XP_003727648.1|	teeth; LC-MS; QAPSGPSDSSEKQ PSGPSDSSEKQGD SGPSDSSEKQGDT
GLEAN3_17590;GLEAN3_22278		52	nothing at 75%;	Mann et al. 2010 Proteome Sci	Strongylocentrotus	purpuratus	E	ref|XP_003727648.1|	teeth; LC-MS; PSPAAPSAPRAPA
GLEAN3_22278		52	nothing at 75%;	Mann et al. 2010 Proteome Sci	Strongylocentrotus	purpuratus	E	ref|XP_003727648.1|	teeth; LC-MS; QAPSGPSDSSEKQ PSGPSDSSEKQGD SGPSDSSEKQGDT
GLEAN3_05990		55	nothing at 75%;	Mann et al. 2008b Proteome Sci	Strongylocentrotus	purpuratus	E	ref|NP_999804.1	LC-MS; FKPDQPQQNAHR FSAQAVPGQRPGFGMPPR GHLIVTK IWMGLAELPSAPESNR LPYDEANMFCAR
GLEAN3_05990		55	nothing at 75%;	Mann et al. 2008b Proteome Sci	Strongylocentrotus	purpuratus	E	ref|NP_999804.1|	LC-MS;
SpSM29		55	sm29	Illies and Ettensohn 2002, Dev. Genes Evol.	Strongylocentrotus	purpuratus	E	AF519417.1
05990 1a,b,c,d		55	sm29; nothing at 75%; Sp_Sm29/SM29	Mann et al. 2010 Proteome	Strongylocentrotus	purpuratus	E	ref|NP_999804.1|	LC-MS
GLEAN3_05989		55	nothing at 75%;	Mann et al. 2008b Proteome Sci	Strongylocentrotus	purpuratus	E	ref|XP_781636.1	LC-MS; ASPLAPR FQHNFLTFTGGANNK GYLITAK LPFMEAQMQCLSFR MPGQAVYPLQGCQPGWTNFGK VWMGLAER
GLEAN3_05989		55	nothing at 75%;	Mann et al. 2008b Proteome Sci	Strongylocentrotus	purpuratus	E	ref|XP_781636.1|	LC-MS;
GLEAN3_05992		55	nothing at 75%;	Mann et al. 2008b Proteome Sci	Strongylocentrotus	purpuratus	E	ref|XP_781636.1|	LC-MS;
05989 1a,b,c,d		55	nothing at 75%; Sp-Clect_13/similar to SM29	Mann et al. 2010 Proteome	Strongylocentrotus	purpuratus	E	ref|XP_781636.1|	LC-MS
GLEAN3_05991		55	nothing at 75%;	Mann et al. 2008b Proteome Sci	Strongylocentrotus	purpuratus	E	ref|XP_781763.1	LC-MS; GYLMTSK MNWLQAQR TEMSFICQYQYML TEMSFICQYQYML VWLGLSEK YSALNGTTPR YTGGGLNK
GLEAN3_05991		55	nothing at 75%;	Mann et al. 2008b Proteome Sci	Strongylocentrotus	purpuratus	E	ref|XP_781763.1|	LC-MS;
05991 1a,b,(c),d		55	sm29; nothing at 75%; Sp-Clect_14/similar to SM29	Mann et al. 2010 Proteome	Strongylocentrotus	purpuratus	E	ref|XP_781763.1|	LC-MS
PFMG1 GenBank AZZ76255.1 116 pearl		59	pfmg1	Evans 2012 Bioinformatics			M		Bioinformatics
PFMG7 GenBank AZZ76261.1 116 pearl		59	pfmg1	Evans 2012 Bioinformatics			M		Bioinformatics
PFMG6 GenBank AZZ76260.1 116 pearl		59	pfmg6	Evans 2012 Bioinformatics			M		Bioinformatics
Contig_90c_2066_1		59	nothing at 75%; PMMG1	Joubert et al. 2010	Pinctada	margaritifera	M
PFMG1		59	pfmg1	Liu et al. 2006	Pinctada	fucata	M	DQ104255.1
Linkine GenBank ABO87300.1 86 frame		60	linkine	Evans 2012 Bioinformatics			M		Bioinformatics
Contig_90c_557_6		60	linkine; nothing at 75%; linkine	Joubert et al. 2010	Pinctada	margaritifera	M	ABO87300
GLEAN3_23115	61	61	nothing at 75%;	Mann et al. 2008b Proteome Sci	Strongylocentrotus	purpuratus	E	ref|XP_783327.2|	LC-MS;
GLEAN3_23115		61	nothing at 75%;	Mann et al. 2008b Proteome Sci	Strongylocentrotus	purpuratus	E	ref|XP_783327.2|	LC-MS;
23115 1a,b,c,d		61	protein tyrosine phosphatase; nothing at 75%; Sp-Ptpriz (protein tyrosine phosphatase, receptor type)/ similar to brain RPTPmam4 isoform II	Mann et al. 2010	Strongylocentrotus	purpuratus	E	ref|XP_783327.2|	LC-MS
6030	61	61	multiple epidermal growth factor; nothing at 755; Sp-Megf6-2 (Multiple epidermal growth factor-like domains 6)	Mann et al. 2010	Strongylocentrotus	purpuratus	E	ref|XP_003728180.1|	LC-MS
GLEAN3_25966		62	nothing at 75%;	Mann et al. 2008b Proteome Sci	Strongylocentrotus	purpuratus	E	ref|XP_003723352.1|	LC-MS;
GLEAN3_25966		62	nothing at 75%;	Mann et al. 2008b Proteome Sci	Strongylocentrotus	purpuratus	E	ref|XP_003723352.1|	LC-MS;
25966 1a,b,c,d		62	nothing at 75%; Sp-Lrr15L (Leucine-rich repeat-containing protein 15_like)	Mann et al. 2010	Strongylocentrotus	purpuratus	E	ref|XP_003723352.1|	LC-MS
11332 1a,b,c,d		63	calcium activated chloride channel; nothing at 75%; Sp-Clca1_3 (Ca2+-activated chloride channel/regulator?)	Mann et al. 2010	Strongylocentrotus	purpuratus	E	ref|XP_791063.2|	LC-MS
GLEAN3_11332		63	nothing at 75%;	Mann et al. 2008b Proteome Sci	Strongylocentrotus	purpuratus	E	ref|XP_791063.2	LC-MS;
GLEAN3_11332		63	nothing at 75%;	Mann et al. 2008b Proteome Sci	Strongylocentrotus	purpuratus	E	ref|XP_791063.2|	LC-MS;
GLEAN3_18255		65	nothing at 75%;	Mann et al. 2010 Proteome Sci	Strongylocentrotus	purpuratus	E	ref|XP_003723313.1|	test, LC-MS; VIIESPSSDDLKS IIESPSSDDLKST
GLEAN3_18255		65	nothing at 75%;	Mann et al. 2010 Proteome Sci	Strongylocentrotus	purpuratus	E	ref|XP_003723313.1|	test, LC-MS; VIIESPSSDDLKS IIESPSSDDLKST
GLEAN3_18255		65	nothing at 75%;	Mann et al. 2010 Proteome Sci	Strongylocentrotus	purpuratus	E	ref|XP_003723313.1|	test, LC-MS; VIIESPSSDDLKS IIESPSSDDLKST
GLEAN3_26949		66	nothing at 75%;	Mann et al. 2008b Proteome Sci	Strongylocentrotus	purpuratus	E	ref|XP_786179.3|	LC-MS;
GLEAN3_26949		66	nothing at 75%;	Mann et al. 2008b Proteome Sci	Strongylocentrotus	purpuratus	E	ref|XP_786179.3|	LC-MS;
26949 1a,b,c,d		66	transferrin; nothing at 75%; Sp-Tf (transferrin)	Mann et al. 2010	Strongylocentrotus	purpuratus	E	ref|XP_786179.3|	LC-MS
lotgi1|234865	66	66	melanotransferrin	Mann et al. 2012	Lottia	gigantea	M	lotgi1|234865	LC-MS/MS
GLEAN3_03918	67	67	nothing at 75%;	Mann et al. 2008b Proteome Sci	Strongylocentrotus	purpuratus	E	ref|XP_003727007.1	LC-MS; ANPEFGAPK IFDPSTSSEDYIK TQLQAENEVVPVVVTDK TTLGICSQR
GLEAN3_03918		67	nothing at 75%;	Mann et al. 2008b Proteome Sci	Strongylocentrotus	purpuratus	E	ref|XP_003727007.1|	LC-MS;
03918 1a,b,(c),d		67	vitellogenin receptor; nothing at 75%; Sp-Lrp8 (low density lipoprotein receptor-related 8/similar to vitellogenin receptor)	Mann et al. 2010	Strongylocentrotus	purpuratus	E	ref|XP_003727007.1|	LC-MS
Cluster016640		67	nothing at 75%; ECR	Moya et al. 2012	Acropora	millepora	C	JT010466.1
20978	67	67	macroglobulin receptor; nothing at 75%; Sp-LrpL_3/similar to alpha-2-macroglobulin receptor; shares 2 peptides with Glean3:13664	Mann et al. 2010	Strongylocentrotus	purpuratus	E	ref|XP_787118.3|	LC-MS
437	67	67	megalin; nothing at 75%; Sp-Z211 (zf-c2h2)/similar to megalin;domains: LDL receptor, EGF, zinc finger	Mann et al. 2010	Strongylocentrotus	purpuratus	E	ref|XP_782026.3|	LC-MS
GLEAN3_11180		68	nothing at 75%;	Mann et al. 2008b Proteome Sci	Strongylocentrotus	purpuratus	E	ref|XP_003726799.1|	LC-MS;
GLEAN3_11180		68	nothing at 75%;	Mann et al. 2008b Proteome Sci	Strongylocentrotus	purpuratus	E	ref|XP_003726799.1|	LC-MS;
11180 1a,b,c,d		68	nothing at 75%; Sp-Fn3/Egff_1; domains:FN3, EGF; extension-like protein; 16% proline	Mann et al. 2010	Strongylocentrotus	purpuratus	E	ref|XP_003726799.1|	LC-MS
GLEAN3_01892		70	nothing at 75%;	Mann et al. 2008b Proteome Sci	Strongylocentrotus	purpuratus	E	ref|XP_797201.3|	LC-MS;
20701 1(a)		70	nothing at 75%; Hypothetical protein	Mann et al. 2010	Strongylocentrotus	purpuratus	E	ref|XP_797201.3|	LC-MS
01892 1a,b,c		70	nothing at 75%; Sp-Sema6d (semaphorin 6D)	Mann et al. 2010	Strongylocentrotus	purpuratus	E	ref|XP_797201.3|	LC-MS
5577		71	mmp18; same as xp_003729016 xp_003729017; Sp-Mmp18/19L3/similar to matrix metalloprotease 14; shares 2 peptides with Glean3:09924 (Sp-Mmp18/19L5) and 3 peptides with Glean3:09925 (Sp-Mmp18/19L4)	Mann et al. 2010 Proteome	Strongylocentrotus	purpuratus	E	ref|XP_003729123.1|	LC-MS
9924		71	mmp18; same as xp_003729016 xp_003729017; Sp-Mmp18/19L5 (similar to MMP14), shares 2 peptides with Glean3:05577 (Sp-Mmp18/19L3),1 peptide with Glean3:05723 (Sp-Mmp18/19L6) and 3 peptides with Glean3:09925 (Sp-Mmp18/19L4)	Mann et al. 2010	Strongylocentrotus	purpuratus	E	ref|XP_003729123.1	LC-MS
5723		71	mmp18; same as xp_003729123 xp_003729016; Sp-Mmp18/19L6; shares 1 peptide with Glean3:09924 (Sp-Mmp18/19L5) and Glean3:09925 (Sp-Mmp18/19L4)	Mann et al. 2010	Strongylocentrotus	purpuratus	E	P_003729017.1	LC-MS
9925		71	mmp18; same as xp_003729123 xp_003729017; Sp-Mmp18/19L4 (similar to MMP-14); shares 1 peptide with Glean3:05723 (Sp-Mmp18/19L6), 3 peptides with Glean3:09924 (Sp-Mmp18/19L5) and 3 peptides with Glean3:05577 (SpMmp18719L3)	Mann et al. 2010 Proteome	Strongylocentrotus	purpuratus	E	ref|XP_003729016.1|	LC-MS
GLEAN3_12549	71	71	nothing at 75%;	Mann et al. 2008b Proteome Sci	Strongylocentrotus	purpuratus	E	ref|XP_786545.2|	LC-MS;
28749 1a,b,c,d	71	71	mmp; nothing at 75%; Sp-Mt5/MmpL2/similar to matrix metalloproteases 14	Mann et al. 2010 Proteome	Strongylocentrotus	purpuratus	E	ref|XP_003725556.1|	LC-MS
GLEAN3_28749		71	nothing at 75%;	Mann et al. 2008b Proteome Sci	Strongylocentrotus	purpuratus	E	ref|XP_003725556.1|	LC-MS;
GLEAN3_28749		71	nothing at 75%;	Mann et al. 2008b Proteome Sci	Strongylocentrotus	purpuratus	E	ref|XP_003725556.1|	LC-MS;
MMP		71	mmp; nothing at 75%	Stumpp et al. 2011 Comp. Biochem. Physiol.	Strongylocentrotus	purpuratus	E	XP_791616.2	ph7.7 7.5% dec over cont 7d; RT-PCR; larvae
GLEAN3_13670		71	nothing at 75%;	Mann et al. 2008b Proteome Sci	Strongylocentrotus	purpuratus	E	ref|XP_791616.2	LC-MS;
GLEAN3_13670		71	nothing at 75%;	Mann et al. 2008b Proteome Sci	Strongylocentrotus	purpuratus	E	ref|XP_791616.2|	LC-MS;
13670 1a,b,c,d		71	nothing at 75%; Sp-Mt1-4/MmpL6 (matrix metalloprotease); shares 1 peptide with Glean3:13669 (Sp-Mt1-4/MmpL5)	Mann et al. 2010 Proteome	Strongylocentrotus	purpuratus	E	ref|XP_791616.2|	LC-MS
13669 1a,b,c,d	71	71	mmp; nothing at 75%; Sp-Mt1-4/MmpL5 (matrix metalloproteases); shares 1 peptide with Glean3:13670 (Sp-Mt1-4/MmpL6)	Mann et al. 2010 Proteome	Strongylocentrotus	purpuratus	E	ref|XP_791600.3|	LC-MS
GLEAN3_13669		71	nothing at 75%;	Mann et al. 2008b Proteome Sci	Strongylocentrotus	purpuratus	E	ref|XP_791600.3	LC-MS;
GLEAN3_13669		71	nothing at 75%;	Mann et al. 2008b Proteome Sci	Strongylocentrotus	purpuratus	E	ref|XP_791600.3|	LC-MS;
28748 1a,b,c,d	71	71	mmp; nothing at 75%; Sp-Mt1-4/MmpL7/matrix metalloprotease 16	Mann et al. 2010 Proteome	Strongylocentrotus	purpuratus	E	ref|NP_001028820.1|	LC-MS
GLEAN3_28748		71	nothing at 75%;	Mann et al. 2008b Proteome Sci	Strongylocentrotus	purpuratus	E	ref|NP_001028820.1|	LC-MS;
GLEAN3_28748		71	nothing at 75%;	Mann et al. 2008b Proteome Sci	Strongylocentrotus	purpuratus	E	ref|NP_001028820.1|	LC-MS;
GLEAN3_05385	71	71	nothing at 75%;	Mann et al. 2008b Proteome Sci	Strongylocentrotus	purpuratus	E	ref|XP_780356.3|	LC-MS;
lotgi1|231475	71	71	matrix metalloproteinase	Mann et al. 2012	Lottia	gigantea	M	lotgi1|231475	LC-MS/MS
Cluster035435	71	71	nothing at 75%; ECR	Moya et al. 2012	Acropora	millepora	C	JT016142
GLEAN3_05538		72	nothing at 75%;	Mann et al. 2008b Proteome Sci	Strongylocentrotus	purpuratus	E	ref|XP_781659.2	LC-MS; ITVGAFNGLSQLR LETLDLSR LTNLLQDAFR
GLEAN3_05538		72	nothing at 75%;	Mann et al. 2008b Proteome Sci	Strongylocentrotus	purpuratus	E	ref|XP_781659.2|	LC-MS;
05538 1a,b,c,d		72	nothing at 75%; Sp-Lrr/Igr_2	Mann et al. 2010 Proteome	Strongylocentrotus	purpuratus	E	ref|XP_781659.2|	LC-MS
GLEAN3_04867	77	77	nothing at 75%;	Mann et al. 2008b Proteome Sci	Strongylocentrotus	purpuratus	E	ref|NP_999775.1	LC-MS; IDPVVHDPNR MMVEPVPVWIGLHVGPMGR QPGFGNPGTPGGR QPGQPGVGGQPGVGGR QPGVGGQPGFGNPGTPGGR QPGVGGQPGVGGR QPGWGQPGVGQPGTPGGR
GLEAN3_18811		77	nothing at 75%;	Mann et al. 2008b Proteome Sci	Strongylocentrotus	purpuratus	E	ref|NP_999775.1|	LC-MS;
GLEAN3_18811		77	nothing at 75%;	Mann et al. 2008b Proteome Sci	Strongylocentrotus	purpuratus	E	ref|NP_999775.1|	LC-MS;
SM50		77	sm50; nothing at 75%	Stumpp et al. 2011 Comp. Biochem. Physiol.	Strongylocentrotus	purpuratus	E	NP_999775.1	ph7.7 6.6% dec over cont 7d; RT-PCR; larvae
18811 1a,b,c,d		77	sm50; nothing at 75%	Mann et al. 2010 Proteome	Strongylocentrotus	purpuratus	E	ref|NP_999775.1|	LC-MS
SM30		77	sm30; nothing at 75%	Martin et al. 2011 J. Exp. Biol.	Paracentrotus	lividus	E	CAD56481.1	ph7.7 ~50% inc over ph8.1; RT-PCR; larvae; 69hr
GLEAN3_18810		77	sm32; same as af519416.1;	Mann et al. 2008b Proteome Sci	Strongylocentrotus	purpuratus	E	ref|NP_999803.1|	LC-MS;
GLEAN3_18810		77	sm32; same as af519416.1; nothing at 75%;	Mann et al. 2008b Proteome Sci	Strongylocentrotus	purpuratus	E	ref|NP_999803.1|	LC-MS;
18810 1a,b,c,d		77	sm32; same as af519416.1; Sp-Sm32	Mann et al. 2010 Proteome	Strongylocentrotus	purpuratus	E	ref|NP_999803.1|	LC-MS
SpSM32		77	sm32; same as np_999803.1	Illies and Ettensohn 2002, Dev. Genes Evol.	Strongylocentrotus	purpuratus	E	AF519416.1
23466		77	calumenin; nothing at 75%; Sp-calu (calumenin)/similar to cardiac calumenin; shares 1 peptide with Glean3:18461	Mann et al. 2010	Strongylocentrotus	purpuratus	E	NP_999766.1	LC-MS
826		77	sm30; same as aaa30070 aab60620; Sp-Sm30B (SM30-α)	Mann et al. 2010	Strongylocentrotus	purpuratus	E	ref|NP_999766.1	LC-MS
827		77	sm30; same as aaa30070 aab60620; Sp-Sm30C (SM30-β); sequences are 97% identical	Mann et al. 2010	Strongylocentrotus	purpuratus	E	ref|NP_999766.1	LC-MS
SM30E		77	sm30; same as np_999766 aaa30070	Stumpp et al. 2011 Comp. Biochem. Physiol.	Strongylocentrotus	purpuratus	E	AAB60620.1	pH7.7 41.7% inc over cont 7d; RT-PCR; larvae
SM30B		77	sm30; same as np_999766 aab60620	Stumpp et al. 2011 Comp. Biochem. Physiol.	Strongylocentrotus	purpuratus	E	AAA30070.1	ph7.7 4.5% inc over cont 7d; RT-PCR; larvae
GLEAN3_04867	77	77	nothing at 75%;	Mann et al. 2010 Proteome Sci	Strongylocentrotus	purpuratus	E	ref|XP_796721.1|	test, LC-MS; GFGNPGTPGGRQP
GLEAN3_04867	77	77	nothing at 75%;	Mann et al. 2008b Proteome Sci	Strongylocentrotus	purpuratus	E	ref|XP_796721.1|	LC-MS;
04867 1a,b,c,d	77	77	sm30; nothing at 75%; Sp-Sm30E (SM30-E)	Mann et al. 2010 Proteome	Strongylocentrotus	purpuratus	E	ref|XP_796721.1|	LC-MS
msp130		77	msp130; nothing at 75%	Martin et al. 2011 J. Exp. Biol.	Paracentrotus	lividus	E	AM569342.1	no sig diff ph7.7 versus 8.1; RT-PCR; larvae; 69hr
GLEAN3_04869		77	nothing at 75%;	Mann et al. 2008b Proteome Sci	Strongylocentrotus	purpuratus	E	ref|XP_796701.1	LC-MS; AGLGAVLFDADLTVVPPNAIEISGK
lotgi1|77105	77	77	uncharacterized protein	Mann et al. 2012	Lottia	gigantea	M	lotgi1|77105	LC-MS/MS
GLEAN3_07682		78	nothing at 75%;	Mann et al. 2008b Proteome Sci	Strongylocentrotus	purpuratus	E	ref|XP_001197712.2	LC-MS; HLAQTYATK LLMPGLYTITATAPGYEPQSR SFYTASPDDAVFK
GLEAN3_07682		78	nothing at 75%;	Mann et al. 2008b Proteome Sci	Strongylocentrotus	purpuratus	E	ref|XP_001197712.2|	LC-MS;
07682 1a,b,c,d		78	nothing at 75%; Sp-CbpdEL/hypothetical protein, domain: carboxypeptidase (peptidase_M14)	Mann et al. 2010 Proteome	Strongylocentrotus	purpuratus	E	ref|XP_001197712.2|	LC-MS
27906 1a,b,c,d		80	lectin; nothing at 75%; Sp-C-lectin/PMC1	Mann et al. 2010	Strongylocentrotus	purpuratus	E	ref|XP_003726084.1	LC-MS
GLEAN3_27906		80	nothing at 75%;	Mann et al. 2008b Proteome Sci	Strongylocentrotus	purpuratus	E	ref|XP_003726084.1|	LC-MS;
GLEAN3_27906		80	nothing at 75%;	Mann et al. 2008b Proteome Sci	Strongylocentrotus	purpuratus	E	ref|XP_003726084.1|	LC-MS;
GLEAN3_00061		81	tubulin	Mann et al. 2008b Proteome Sci	Strongylocentrotus	purpuratus	E	ref|XP_795696.3|	LC-MS;
GLEAN3_00062		81	tubulin	Mann et al. 2008b Proteome Sci	Strongylocentrotus	purpuratus	E	ref|XP_791790.1|	LC-MS;
02788 1b,c		81	tubulin/Sp-Btub1 (β-tubulin); shares 12 peptides with Glean3:00062 (Sp-Btub3) and 6 peptides with Glean3:14285 (Sp-Tubb2a; tubulin C)	Mann et al. 2010	Strongylocentrotus	purpuratus	E	ref|XP_782388.3|	LC-MS
lotgi1|197703		81	tubulin	Mann et al. 2012	Lottia	gigantea	M	lotgi1|197703	LC-MS/MS
EKC35235.1		81	tubulin	Zhang et al. 2012	Crassostrea	gigas	M	EKC35235.1	LC-MS
lotgi1|223558	81	81	a-tubulin	Mann et al. 2012	Lottia	gigantea	M	lotgi1|223558	LC-MS
g13377		81	tubulin; nothing at 75%	Drake et al. 2013	Stylophora	pistillata	c	KC479168	LC-MS/MS
GLEAN3_18666		82	nothing at 75%;	Mann et al. 2010 Proteome Sci	Strongylocentrotus	purpuratus	E	ref|XP_001199000.1|	test, LC-MS; VPGDDLSEEKRAN
GLEAN3_18666		82	nothing at 75%;	Mann et al. 2010 Proteome Sci	Strongylocentrotus	purpuratus	E	ref|XP_001199000.1|	test, LC-MS; VPGDDLSEEKRAN
GLEAN3_18666		82	nothing at 75%;	Mann et al. 2010 Proteome Sci	Strongylocentrotus	purpuratus	E	ref|XP_001199000.1|	test, LC-MS; VPGDDLSEEKRAN
GLEAN3_18813		83	sm37; same as aaf88136	Mann et al. 2008b Proteome Sci	Strongylocentrotus	purpuratus	E	ref|NP_999776.1|	LC-MS;
18813 1a,b,c,d		83	Sm37; same as np_999776; Sp-Sm37	Mann et al. 2010 Proteome	Strongylocentrotus	purpuratus	E	gb|AAF88136.1|	LC-MS
GLEAN3_18813		83	sm37; same as np_999776.1	Mann et al. 2008b Proteome Sci	Strongylocentrotus	purpuratus	E	gb|AAF88136.1|	LC-MS;
Cluster010081		86	nothing at 75%; ECR	Moya et al. 2012	Acropora	millepora	C	JT020644
Cluster026605		86	same as jt020644; ECR	Moya et al. 2012	Acropora	millepora	C	JR998853
lotgi1|89037	86	86	uncharacterized protein	Mann et al. 2012	Lottia	gigantea	M	lotgi1|89037	LC-MS/MS
GLEAN3_09549		88	nothing at 75%;	Mann et al. 2008b Proteome Sci	Strongylocentrotus	purpuratus	E	ref|XP_783994.2	LC-MS; ASPGSITLAIR DSAGYVGFVFK DSPGAMGGLR SLYPSLEDMKVDK
GLEAN3_09549		88	nothing at 75%;	Mann et al. 2008b Proteome Sci	Strongylocentrotus	purpuratus	E	ref|XP_783994.2|	LC-MS;
09549 1a,(c),d		88	nothing at 75%; Similar to Sdcbp-prov (syndecan-binding protein, syntenin); domains: PDZ_signaling; N-term:N-AcSer2	Mann et al. 2010 Proteome	Strongylocentrotus	purpuratus	E	ref|XP_783994.2|	LC-MS
lotgi1|186095	88	88	synthenin	Mann et al. 2012	Lottia	gigantea	M	lotgi1|186095	LC-MS/MS
13825 1a,b,c,d		89	ctype lectin; nothing at 75%; Sp-Clect_76, domain: C-lectin; pI 9.9; 12% Gly, 16% Pro	Mann et al. 2010 Proteome	Strongylocentrotus	purpuratus	E	ref|XP_003726239.1|	LC-MS
GLEAN3_13825		89	nothing at 75%;	Mann et al. 2008b Proteome Sci	Strongylocentrotus	purpuratus	E	ref|XP_003726239.1	LC-MS;
GLEAN3_13825		89	nothing at 75%;	Mann et al. 2008b Proteome Sci	Strongylocentrotus	purpuratus	E	ref|XP_003726239.1|	LC-MS;
GLEAN3_22047		90	nothing at 75%;	Mann et al. 2008b Proteome Sci	Strongylocentrotus	purpuratus	E	ref|XP_796428.3|	LC-MS;
GLEAN3_22047		90	nothing at 75%;	Mann et al. 2008b Proteome Sci	Strongylocentrotus	purpuratus	E	ref|XP_796428.3|	LC-MS;
22047 1(b),c,(d)		90	nothing at 75%; -Pla2g1b_8/similar to phospholipase A2	Mann et al. 2010 Proteome	Strongylocentrotus	purpuratus	E	ref|XP_796428.3|	LC-MS
GLEAN3_23052		91	nothing at 75%;	Mann et al. 2008b Proteome Sci	Strongylocentrotus	purpuratus	E	ref|XP_001176794.1|	LC-MS;
GLEAN3_23052		91	nothing at 75%;	Mann et al. 2008b Proteome Sci	Strongylocentrotus	purpuratus	E	ref|XP_001176794.1|	LC-MS;
23052 1a,b,c,d		91	nothing at 75%; Hypothetical protein	Mann et al. 2010	Strongylocentrotus	purpuratus	E	ref|XP_001176794.1|	LC-MS
GLEAN3_11163		93	nothing at 75%;	Mann et al. 2008b Proteome Sci	Strongylocentrotus	purpuratus	E	ref|XP_793473.2	LC-MS;
GLEAN3_11163		93	nothing at 75%;	Mann et al. 2008b Proteome Sci	Strongylocentrotus	purpuratus	E	ref|XP_793473.2|	LC-MS;
11163 1(a),(b),c,d		93	nothing at 75%; Sp-Clect_25/hypothetical protein; domain C_lectin	Mann et al. 2010 Proteome	Strongylocentrotus	purpuratus	E	ref|XP_793473.2|	LC-MS
EFCBP		94	efcbp	Huang et al 2007, Biochimica et Biophysica Acta	Pinctada	fucata	M	DQ494416
EFCBP		94	efcbp; EF-hand calcium-binding protein	Huang et al. 2007	Pinctada	fucata	M	ABF48089.1
12144 1b,c,d		96	histone; nothing at 75%; same as np_999707; Sp-EhH4_33/histone H4 family; peptide set shared with many entries (see Additional file 3)	Mann et al. 2010 Proteome	Strongylocentrotus	purpuratus	E	ref|XP_001175505.2|	LC-MS
lotgi1|175997		96	histone	Mann et al. 2012	Lottia	gigantea	M	lotgi1|175997	LC-MS/MS
GLEAN3_00685		96	histone; nothing at 75%; same as xp_001175505.2	Mann et al. 2008b Proteome Sci	Strongylocentrotus	purpuratus	E	ref|NP_999707.1|	LC-MS;
GLEAN3_00685		96	histone; nothing at 75%; same as xp_001175505.2;	Mann et al. 2008b Proteome Sci	Strongylocentrotus	purpuratus	E	ref|NP_999707.1	LC-MS; DNIQGITKPAIR ISGLIYEETR TVTAMDVVYALK VFLENVIR
1312	96	96	nothing at 75%; same as h2bl4; Sp-ClvhH2b; shares peptides with many related entries	Mann et al. 2010	Strongylocentrotus	purpuratus	E	NP_001229615.1	LC-MS
GLEAN3_16845	96	96	nothing at 75%; same as np_001229615.1;	Mann et al. 2008b Proteome Sci	Strongylocentrotus	purpuratus	E	sp|P16890.1|H2BL4_STRPU	LC-MS;
BMSP100 GenBank BAK86420.1 1001 frame		97	same as bmsp120; nothing at 75%	Evans 2012 Bioinformatics			M		Bioinformatics
BMSP120 GenBank BAK86420.1 1091 frame		97	same as bmsp100; nothing at 75%	Evans 2012 Bioinformatics			M		Bioinformatics
lotgi1|112071	97	97	uncharacterized protein	Mann et al. 2012	Lottia	gigantea	M	lotgi1|112071	LC-MS/MS
lotgi1|140660	97	97	bmsp	Mann et al. 2012	Lottia	gigantea	M	lotgi1|140660	LC-MS/MS
lotgi1|173138	97	97	bmsp/pif	Mann et al. 2012	Lottia	gigantea	M	lotgi1|173138	LC-MS/MS
GLEAN3_16285		98	nothing at 75%;	Mann et al. 2010 Proteome Sci	Strongylocentrotus	purpuratus	E	ref|XP_003727522.1|	test, LC-MS; ESKPLLSDGEEVE
GLEAN3_16285		98	nothing at 75%;	Mann et al. 2010 Proteome Sci	Strongylocentrotus	purpuratus	E	ref|XP_003727522.1|	test, LC-MS; ESKPLLSDGEEVE
12138		100	laminin; nothing at 75%; Sp-LamG/Egff2/similar to DEAH box polypeptide 33; shares 1 peptide with Glean3:15404 /Sp-LamG/Egff3)	Mann et al. 2010	Strongylocentrotus	purpuratus	E	ref|XP_781951.3|	LC-MS
15404 1a,b		100	laminin; nothing at 75%; Sp-LamG/Egff3/similar to DEAH box protein 33	Mann et al. 2010	Strongylocentrotus	purpuratus	E	ref|XP_781951.3|	LC-MS
GLEAN3_26863		102	nothing at 75%;	Mann et al. 2010 Proteome Sci	Strongylocentrotus	purpuratus	E	ref|XP_787192.3|	test, LC-MS; LTRFFLSDDEEET
GLEAN3_26863		102	nothing at 75%;	Mann et al. 2010 Proteome Sci	Strongylocentrotus	purpuratus	E	ref|XP_787192.3|	test, LC-MS; LTRFFLSDDEEET
GLEAN3_25515		103	nothing at 75%;	Mann et al. 2010 Proteome Sci	Strongylocentrotus	purpuratus	E	ref|XP_786033.1|	test, LC-MS; LSKLSGSPLPTVR
GLEAN3_25515		103	nothing at 75%;	Mann et al. 2010 Proteome Sci	Strongylocentrotus	purpuratus	E	XP_786033.1	test, LC-MS; LSKLSGSPLPTVR
05420 1a,b	104	104	nothing at 75%; Sp-Srcr42/similar to scavenger receptor cysteine-rich protein type 12	Mann et al. 2010	Strongylocentrotus	purpuratus	E	ref|XP_785644.3|	LC-MS
14602 1a		104	scavenger receptor; nothing at 75%; Sp-Srcr115 (scavenger receptor Cys-rich)	Mann et al. 2010	Strongylocentrotus	purpuratus	E	ref|XP_785644.3|	LC-MS
Cluster000899	104	104	nothing at 75%; ECR	Moya et al. 2012	Acropora	millepora	C	JR989918
Cluster027449	104	104	nothing at 75%; ECR	Moya et al. 2012	Acropora	millepora	C	JT012363.1
Cluster028912	104	104	nothing at 75%; ECR	Moya et al. 2012	Acropora	millepora	C	JR997520.1
EKC29960.1	104	104	chymotrypsin B	Zhang et al. 2012	Crassostrea	gigas	M	EKC29960.1	LC-MS/MS
lotgi1|69892	104	104	uncharacterized	Mann et al. 2012	Lottia	gigantea	M	lotgi1|69892	LC-MS/MS
EKC33148.1	104	104	deleted in malignant brain tumors 1	Zhang et al. 2012	Crassostrea	gigas	M	EKC33148.1	LC-MS/MS
10062	104	104	nothing at 75%; Sp-Srcr83/SRCR membrane form 2; shares 1 peptide with Glean3:16374 (Sp-Srcr134), Glean3:09354 (Sp-Scrc75), Glean3:16373 (Sp-srcr133) and Glean3:15153	Mann et al. 2010	Strongylocentrotus	purpuratus	E	ref|XP_786061.3|	LC-MS
GLEAN3_14937		105	nothing at 75%;	Mann et al. 2010 Proteome Sci	Strongylocentrotus	purpuratus	E	ref|XP_794425.3|	test, LC-MS; KNFDDGSLELKAE
GLEAN3_14937		105	nothing at 75%;	Mann et al. 2010 Proteome Sci	Strongylocentrotus	purpuratus	E	ref|XP_794425.3|	test, LC-MS; KNFDDGSLELKAE
GLEAN3_04746		106	uncharacterized	Mann et al. 2008b Proteome Sci	Strongylocentrotus	purpuratus	E	ref|XP_791486.2|	LC-MS;
04746 1a,b,c		106	uncharacterized/Sp-Fn3/Igf_29/similar to P. lividus FGF receptor 2	Mann et al. 2010 Proteome	Strongylocentrotus	purpuratus	E	gb|AEE37276.1|	LC-MS
GLEAN3_19967	107	107	nothing at 75%;	Mann et al. 2008b Proteome Sci	Strongylocentrotus	purpuratus	E	ref|XP_003729251.1|	LC-MS;
GLEAN3_26843		107	nothing at 75%;	Mann et al. 2008b Proteome Sci	Strongylocentrotus	purpuratus	E	ref|XP_003729251.1|	LC-MS;
GLEAN3_12011	107	107	nothing at 75%;	Mann et al. 2008b Proteome Sci	Strongylocentrotus	purpuratus	E	ref|XP_781996.	LC-MS;
6165		108	megalin; nothing at 75%; Sp-LrpL_1/similar to gp330/GH1281p/megalin	Mann et al. 2010	Strongylocentrotus	purpuratus	E	ref|XP_001199072.1|	LC-MS
22132		108	megalin; nothing at 75%; Sp-LrpL_5/similar to gp330/GH1281p/megalin	Mann et al. 2010	Strongylocentrotus	purpuratus	E	ref|XP_001199072.1|	LC-MS
GLEAN3_13301		110	nothing at 75%;	Mann et al. 2008b Proteome Sci	Strongylocentrotus	purpuratus	E	ref|XP_001197263.2	LC-MS;
GLEAN3_13301		110	nothing at 75%;	Mann et al. 2008b Proteome Sci	Strongylocentrotus	purpuratus	E	ref|XP_001197263.2|	LC-MS;
GLEAN3_22366		112	nothing at 75%;	Mann et al. 2008b Proteome Sci	Strongylocentrotus	purpuratus	E	ref|XP_783971.3|	LC-MS;
GLEAN3_22366		112	nothing at 75%;	Mann et al. 2008b Proteome Sci	Strongylocentrotus	purpuratus	E	ref|XP_783971.3|	LC-MS;
GLEAN3_26629		113	nothing at 75%;	Mann et al. 2008b Proteome Sci	Strongylocentrotus	purpuratus	E	ref|XP_787649.3|	LC-MS;
GLEAN3_26630		113	nothing at 75%;	Mann et al. 2008b Proteome Sci	Strongylocentrotus	purpuratus	E	ref|XP_787649.3|	LC-MS;
Cluster005253	114	114	nothing at 75%; ECR	Moya et al. 2012	Acropora	millepora	C	JT013571
Cluster026414		114	same as JT013571; ECR	Moya et al. 2012	Acropora	millepora	C	JT011929.1
26072 1a	114	114	endothelin converting enzyme; nothing at 75%; Sp-EceL(endothelin converting enzyme)/similar to neprilysin; domain: Peptidase_M13	Mann et al. 2010	Strongylocentrotus	purpuratus	E	ref|XP_781407.2|	LC-MS
619		115	proaminopeptidase/Sp-ApdpL/similar to aminopeptidase P; GPI?	Mann et al. 2010	Strongylocentrotus	purpuratus	E	ref|XP_001201197.2|	LC-MS
5008		115	proaminopeptidase/Sp-Xpapd2Lmb-3/similar to aminopeptidase P	Mann et al. 2010	Strongylocentrotus	purpuratus	E	ref|XP_795251.2|	LC-MS
434	116	116	nothing at 75%; Hypothetical protein, acidic (pI 4.4)	Mann et al. 2010 Proteome	Strongylocentrotus	purpuratus	E	ref|XP_003728681.1|	LC-MS
25454		116	thrombospondin; nothing at 75%; Sp-Thsd7b (Thrombospondin type-1 domain-containing protein 7B)	Mann et al. 2010	Strongylocentrotus	purpuratus	E	ref|XP_003728681.1|	LC-MS
19739	116	116	thrombospondin; nothing at 75%; Sp-Thsd7b (thrombospondin)/similar to RIKEN cDNA D130067I03 gene, partial; shares 2 peptides with Glean3:25454 (Sp-Thsd7b_2)	Mann et al. 2010	Strongylocentrotus	purpuratus	E	XP_784935.3	LC-MS
GLEAN3_20322		117	heat shock protein	Mann et al. 2008b Proteome Sci	Strongylocentrotus	purpuratus	E	ref|XP_783030.3|	LC-MS;
GLEAN3_24082		117	heat shock protein	Mann et al. 2008b Proteome Sci	Strongylocentrotus	purpuratus	E	ref|XP_003725294.1|	LC-MS;
GLEAN3_27527		117	nothing at 75%;	Mann et al. 2008b Proteome Sci	Strongylocentrotus	purpuratus	E	ref|NP_999808.1|	LC-MS;
lotgi1|161608		117	heat shock protein 90a	Mann et al. 2012	Lottia	gigantea	M	lotgi1|161608	LC-MS
GLEAN3_18919		118	nothing at 75%;	Mann et al. 2010 Proteome Sci	Strongylocentrotus	purpuratus	E	ref|XP_003725591.1|	teeth; LC-MS; EQPKEISSGEEEQ QPKEISSGEEEQP EQPKEISSGEEEQ QPKEISSGEEEQP EQPNEISSGEGEE QPNEISSGEGEEP EQPNEISSGEGEE QPNEISSGEGEEP EEPKEISSGEGEE EPKEISSGEGEEP EQPKEMSSGEEEE QPKEMSSGEEEEP EEPKEMSSGEEEQ EPKEMSSGEEEQP EEPKEMSSGEGEE EPKEMSSGEGEEQ EQPKEMSSGEGYQ QPKEMSSGEGYQP ELPQEMSSGQVEE LPQEMSSGQVEEP EEPKEMSSGQVEE EPKEMSSGQVEEQ EQPKEVSSGEGEQ QPKEVSSGEGEQP EQPKEVSSGQVEE QPKEVSSGQVEEL EELKGMSSGEQEE ELKGMSS…
GLEAN3_18919		118	nothing at 75%;	Mann et al. 2010 Proteome Sci	Strongylocentrotus	purpuratus	E	ref|XP_003725591.1|	teeth; LC-MS; EQPKEISSGEEEQ QPKEISSGEEEQP EQPKEISSGEEEQ QPKEISSGEEEQP EQPNEISSGEGEE QPNEISSGEGEEP EQPNEISSGEGEE QPNEISSGEGEEP EEPKEISSGEGEE EPKEISSGEGEEP EQPKEISSGEGEQ QPKEISSGEGEQP ELPQEMSSGQVEE LPQEMSSGQVEEP EEPKEMSSGQVEE EPKEMSSGQVEEQ EQPKEVSSGQVEE QPKEVSSGQVEEL EELKGMSSGEQEE ELKGMSSGEQEEP
18348 1a		119	neurexin; same as xp_001197577.1; Sp-CasprL/similar to neurexin IV/similar to contactin-associated protein 5	Mann et al. 2010	Strongylocentrotus	purpuratus	E	ref|XP_780725.3|	LC-MS
7341		119	neurexin; same as xp_780725.3; Sp-Caspr/similar to neurexin IV, shares peptide set with Glean3:04145	Mann et al. 2010	Strongylocentrotus	purpuratus	E	ref|XP_001197577.1|	LC-MS
09164 1(a)		120	heat shock protein; nothing at 75%; Sp-Hsp701E/similar to heat shock protein 70 isoform 3; shares 1 peptide with Glean3:009165 (Sp-Hsp701A) and 1 peptide with Glean3:09477 (Sp-Hsp701C)	Mann et al. 2010	Strongylocentrotus	purpuratus	E	ref|XP_003728714.1|	LC-MS
GLEAN3_08560		120	nothing at 75%;	Mann et al. 2008b Proteome Sci	Strongylocentrotus	purpuratus	E	ref|XP_003728714.1|	LC-MS;
9477		120	heat shock protein; nothing at 75%; Sp-Hsp701C; shares peptides with many related entries (see Additional file 3)	Mann et al. 2010	Strongylocentrotus	purpuratus	E	XP_780151.1	LC-MS
lotgi1|216416		120	heat shock protein 70	Mann et al. 2012	Lottia	gigantea	M	lotgi1|216416	LC-MS/MS
9165	120	120	heat shock protein; nothing at 75%; Sp-Hsp701A; shares 1 peptide with Glean3:09164 (Sp-Hsp701E) and 2 peptides with Glean3:09477 (Sp-Hsp701C)	Mann et al. 2010	Strongylocentrotus	purpuratus	E	P_003725496.1	LC-MS
GLEAN3_09165	120	120	nothing at 75%;	Mann et al. 2008b Proteome Sci	Strongylocentrotus	purpuratus	E	ref|XP_003725496.1|	LC-MS;
logtgi1|177837	120	120	heat shock protein 70	Mann et al. 2012	Lottia	gigantea	M	lotgi177837	LC-MS/MS
lotgi1|190284	120	120	heat shock protein 70	Mann et al. 2012	Lottia	gigantea	M	lotgi1|190284	LC-MS/MS
GLEAN3_09477	120	120	nothing at 75%;	Mann et al. 2008b Proteome Sci	Strongylocentrotus	purpuratus	E	ref|XP_780151.1|	LC-MS;
lotgi1|159745	120	120	heat shock protein 70	Mann et al. 2012	Lottia	gigantea	M	lotgi1|159745	LC-MS/MS
EKC36325.1	120	120	heat shock protein 70	Zhang et al. 2012	Cr	gigas	M	EKC36325.1	LC-MS/MS
GLEAN3_00438	121	121	nothing at 75%;	Mann et al. 2008b Proteome Sci	Strongylocentrotus	purpuratus	E	ref|XP_799905.1|	LC-MS;
00438 1a,b,c		121	nothing at 75%; Sp-Hypp_302/similar to peptidylaminoacyl-L/D isomerase	Mann et al. 2010	Strongylocentrotus	purpuratus	E	ref|XP_799905.1|	LC-MS
GLEAN3_00439	121	121	IgG; same as xp_003724499.1; nothing at 75%;	Mann et al. 2008b Proteome Sci	Strongylocentrotus	purpuratus	E	XP_801757	LC-MS; NVDINPDVAAR
00439 1a,b,c,(d)		121	IgG; same as xp_801757.1; nothing at 75%; Sp-FcgbpL (Fc fragment of IgG-binding protein-like) shares 2 peptides with Glean3:04158 and 1 peptide with Glean3:04159	Mann et al. 2010	Strongylocentrotus	purpuratus	E	ref|XP_003724499.1	LC-MS
GLEAN3_10589		122	nothing at 75%;	Mann et al. 2010 Proteome Sci	Strongylocentrotus	purpuratus	E	ref|XP_784730.2|	teeth; LC-MS; PIYIPVSVPRGRD
GLEAN3_10589		122	nothing at 75%;	Mann et al. 2010 Proteome Sci	Strongylocentrotus	purpuratus	E	ref|XP_784730.2|	teeth; LC-MS; PIYIPVSVPRGRD
lotgi1|238844	122	122	chloride-channel Ca-activated-2-like	Mann et al. 2012	Lottia	gigantea	M	lotgi1|238844	jld
Mucoperlin		123	mucoperlin; nothing at 75%	Marin et al. 2000	Pinna	nobilis	M	AAK18045.1
mucoperlin		123	mucoperlin; nothing at 75%	Marin et al. 2000	Pinna	nobilis	M	AF145215
GLEAN3_15906		125	nothing at 75%;	Mann et al. 2010 Proteome Sci	Strongylocentrotus	purpuratus	E	ref|XP_800447.3|	teeth; LC-MS; LSVPQGSPLLSRC
15906 1a,b		125	nothing at 75%; Sp-Hypp_120	Mann et al. 2010	Strongylocentrotus	purpuratus	E	ref|XP_800447.3|	LC-MS
Galaxin-like 2	127	127	amgalaxin	Hayward et al. 2011	Acropora	millepora	C	B85
Amgalaxin-like 2		127	amgalaxin; same as b85 from hayward	Reyes-Bermudez et al. 2009	Acropora	millepora	C	ADI50285.1
Amgalaxin-like 1	127	127	amgalaxin	Reyes-Bermudez et al. 2009	Acropora	millepora	C	ADI50284.1
06812 1a,b,c	129	129	kirrel; nothing at 75%; Sp-Kirrel2L (kin of IRRE-like 2-like)	Mann et al. 2010	Strongylocentrotus	purpuratus	E	ref|XP_003725087.1|	LC-MS
GLEAN3_06812		129	nothing at 75%;	Mann et al. 2008b Proteome Sci	Strongylocentrotus	purpuratus	E	ref|XP_003725087.1|	LC-MS;
GLEAN3_20457	129	129	nothing at 75%;	Mann et al. 2008b Proteome Sci	Strongylocentrotus	purpuratus	E	ref|XP_001198151.1|	LC-MS;
20457 1a,b,c		129	nothing at 75%; Sp-B7L3/hypothetical protein; domains: IG	Mann et al. 2010 Proteome	Strongylocentrotus	purpuratus	E	ref|XP_001198151.1|	LC-MS
11147		130	nothing at 75%; Hypothetical protein	Mann et al. 2010	Strongylocentrotus	purpuratus	E	ref|XP_003724810.1|	LC-MS
15227		130	nothing at 75%; Hypothetical protein	Mann et al. 2010	Strongylocentrotus	purpuratus	E	ref|XP_003724810.1|	LC-MS
06103 1a,b		131	calsynthenin; nothing at 75%; Hypothetical protein/similar to calsynthenin-1 (aa113-217)	Mann et al. 2010	Strongylocentrotus	purpuratus	E	ref|XP_003726434.1	LC-MS
05228 1a,b,c		131	laminin; nothing at 75%; Sp-CalsynteninL1/hypothetical protein; domains: LamG, cadherin; shares 1 peptide with Glean3:23005 (Sp-calsynteninL2)	Mann et al. 2010	Strongylocentrotus	purpuratus	E	ref|XP_003726434.1|	LC-MS
GLEAN3_15125		132	nothing at 75%;	Mann et al. 2010 Proteome Sci	Strongylocentrotus	purpuratus	E	ref|XP_782915.3|	teeth; LC-MS; VGGDEESNLASLE EESNLASLEGDKD
GLEAN3_15125		132	nothing at 75%;	Mann et al. 2010 Proteome Sci	Strongylocentrotus	purpuratus	E	ref|XP_782915.3|	teeth; LC-MS; VGGDEESNLASLE EESNLASLEGDKD
GLEAN3_05419		133	nothing at 75%;	Mann et al. 2010 Proteome Sci	Strongylocentrotus	purpuratus	E	ref|NP_001135850.1|	test, LC-MS; RIIEDEYIAREGA
GLEAN3_05419		133	nothing at 75%;	Mann et al. 2010 Proteome Sci	Strongylocentrotus	purpuratus	E	ref|NP_001135850.1|	teeth; LC-MS; RIIEDEYIAREGA
GLEAN3_20139		135	nothing at 75%;	Mann et al. 2010 Proteome Sci	Strongylocentrotus	purpuratus	E	ref|XP_800057.2|	test, LC-MS; RFVQDDSESNEAD VQDDSESNEADED AEAAGLSSNEVTQ EAAGLSSNEVTQV QQPLPFSEQQQEY
GLEAN3_20139		135	nothing at 75%;	Mann et al. 2010 Proteome Sci	Strongylocentrotus	purpuratus	E	ref|XP_800057.2|	test, LC-MS; AEAAGLSSNEVTQ EAAGLSSNEVTQV
00595 1b,c		136	elongation factor; nothing at 75% Sp-EF1a (elongation factor 1A); shares 2 peptides with Glean3:09949 (Sp-Ef1a_1)	Mann et al. 2010	Strongylocentrotus	purpuratus	E	NP_001116969.1	LC-MS
GLEAN3_00595		136	nothing at 75%;	Mann et al. 2008b Proteome Sci	Strongylocentrotus	purpuratus	E	ref|NP_001116969.1|	LC-MS;
lotgi1|239271		136	elongation factor 1a	Mann et al. 2012	Lottia	gigantea	M	lotgi1|239271	LC-MS/MS
EKC33063.1		136	elongation factor 1a	Zhang et al. 2012	Crassostrea	gigas	M	EKC33063.1	LC-MS/MS
13819 1c		137	enolase; nothing at 75%; Sp-Eno1 (α-enolase); shares 1peptide with Glean3:13820 (Sp-Eno3, β-enolase)	Mann et al. 2010	Strongylocentrotus	purpuratus	E	ref|XP_003726238.1|	LC-MS
lotgi1|182683		137	enolase	Mann et al. 2012	Lottia	gigantea	M	lotgi1|239271	LC-MS/MS
GLEAN3_13819		137	nothing at 75%;	Mann et al. 2008b Proteome Sci	Strongylocentrotus	purpuratus	E	ref|XP_003726238.1|	LC-MS;
Collagen alpha-1 chain		138	collage; same as a26	Ramos-Silva et al. 2013 Mar Biol Evol	Acropora	millepora	C	JR991083 (JR996633) (EZ002278)	LC-MS/MS
g1441		138	vitellogenin; nothing at 75%	Drake et al. 2013	Stylophora	pistillata	c	KC479166	LC-MS/MS
Zona pellucida domain-containing protein		138	zona pellucida; same as b26	Ramos-Silva et al. 2013 Mar Biol Evol	Acropora	millepora	C	JN631095 (JR973492)	LC-MS/MS
ZP domain mesoglein		138	zona pellucida; same as jr991141; nothing at 75%	Hayward et al. 2011	Acropora	millepora	C	B26
g18277		138	zona pellucida; nothing at 75%	Drake et al. 2013	Stylophora	pistillata	c	KC479163	LC-MS/MS
GLEAN3_13143		139	nothing at 75%;	Mann et al. 2010 Proteome Sci	Strongylocentrotus	purpuratus	E	ref|XP_003723471.1|	test, LC-MS; LITPTNSSDEEEE LTQRLITPTNSSD ITPTNSSDEEEEK
GLEAN3_13143		139	nothing at 75%;	Mann et al. 2010 Proteome Sci	Strongylocentrotus	purpuratus	E	ref|XP_003723471.1|	test, LC-MS; LITPTNSSDEEEE ITPTNSSDEEEEK	TGDLSPESLSFIPPEK	VSGTVSMYEVIDVPYWMLLK	VVKQIATEGPVADIAECGDLVAFTQPGKPHFTDVGSLK	YNPATMMMK	YNPATMMMKELCSVEVGSQPIAVR	YVNPEGTITTVR
GLEAN3_22631		140	nothing at 75%;	Mann et al. 2008b Proteome Sci	Strongylocentrotus	purpuratus	E	ref|XP_003728519.1|	LC-MS;
22631 1(a),c		140	triad; nothing at 75%; Sp-Hypp_2620/similar to TRIAD1 type I; domain:EMI; 19%Gly, 12%Pro	Mann et al. 2010	Strongylocentrotus	purpuratus	E	ref|XP_003728519.1|	LC-MS
Cluster014878		141	same as jr990691; nothing at 75%; ECR	Moya et al. 2012	Acropora	millepora	C	JR996079.1
Cluster011324		141	same as jr996079; ECR	Moya et al. 2012	Acropora	millepora	C	JR990691.1
Cluster035265		141	nothing at 75%; ECR	Moya et al. 2012	Acropora	millepora	C	JR980573.1
GLEAN3_27169		142	nothing at 75%;	Mann et al. 2008b Proteome Sci	Strongylocentrotus	purpuratus	E	ref|XP_001198520.2|	LC-MS;
GLEAN3_27169		142	nothing at 75%;	Mann et al. 2008b Proteome Sci	Strongylocentrotus	purpuratus	E	ref|XP_001198520.2|	LC-MS;
19655 1a		143	astacin; nothing at 75%l Sp-AnL18 (astacin-like)	Mann et al. 2010	Strongylocentrotus	purpuratus	E	ref|XP_003727805.1	LC-MS
GLEAN3_03612		143	nothing at 75%;	Mann et al. 2008b Proteome Sci	Strongylocentrotus	purpuratus	E	ref|XP_003727805.1	LC-MS; DQSLYDQSLLK
galaxin	144	144	galaxin	Fukuda et al. 2003	Galaxea	fascicularis	C	BAC41519.1
Amgalaxin		144	amgalaxin; galaxin; same as hm163215	Reyes-Bermudez et al. 2009	Acropora	millepora	C	ADI50283.1
Galaxin		144	galaxin; same as adi50283	Ramos-Silva et al. 2013 Mar Biol Evol	Acropora	millepora	C	HM163215 (JR993391)	LC-MS/MS
Galaxin 2	144	144	galaxin; nothing at 75%	Ramos-Silva et al. 2013 Mar Biol Evol	Acropora	millepora	C	JR976690	LC-MS/MS
GLEAN3_11637		146	nothing at 75%;	Mann et al. 2010 Proteome Sci	Strongylocentrotus	purpuratus	E	ref|XP_003723590.1|	test, LC-MS; LGNLPISREGNDP
GLEAN3_11637		146	nothing at 75%;	Mann et al. 2010 Proteome Sci	Strongylocentrotus	purpuratus	E	ref|XP_003723590.1|	test, LC-MS; LGNLPISREGNDP
26001		148	anenxin; nothing at 75%; Hypothetical protein; domains: annexin		Strongylocentrotus	purpuratus	E	ref|XP_003725708.1|	LC-MS
21041		148	annexin; nothing at 75%; Hypothetical protein; domain: annexin; similarity to A11	Mann et al. 2010	Strongylocentrotus	purpuratus	E	ref|XP_003725708.1	LC-MS
14160		148	nothing at 75%; Hypothetical protein; domain: partial annexin (A7)	Mann et al. 2010 Proteome	Strongylocentrotus	purpuratus	E	ref|XP_003725708.1|	LC-MS
7441		148	annexin; nothing at 75%; Similar to MGC139263 protein; domain: annexin (partial?)	Mann et al. 2010	Strongylocentrotus	purpuratus	E	ref|XP_783004.3|	LC-MS
25962 1a,b		148	annexin; nothing at 75%; Sp-Anxa7_2 (annexin)/similar to MGC139263 protein; shares 3 peptides with Glean3:00475	Mann et al. 2010	Strongylocentrotus	purpuratus	E	ref|XP_783004.3|	LC-MS
11106 1(a),b,d		148	annexin; nothing at 75%; Sp-Anxn (annexin)/similar to annexin A4; shares 2 petides with Glean3:11107 (Sp-Anxn_1)	Mann et al. 2010	Strongylocentrotus	purpuratus	E	ref|XP_798157.2	LC-MS
GLEAN3_11106		148	nothing at 75%;	Mann et al. 2008b Proteome Sci	Strongylocentrotus	purpuratus	E	ref|XP_798157.2	LC-MS; ALDALLS FGTDESEFQR FINDPIQYYVDK GLGTDEAVLVR LLVGLSVGGR QVFAAYGSLTSK TGYLNLVR TNAQIAEIK VQADAQALYEAGAAK
lotgi1|195070	148	148	annexin 7a	Mann et al. 2012	Lottia	gigantea	M	lotgi1|195070	LC-MS/MS
lotgi1|219490	148	148	annexin type iv	Mann et al. 2012	Lottia	gigantea	M	lotgi1|219490	LC-MS/MS
lotgi1|219492	148	148	annexin type iv	Mann et al. 2012	Lottia	gigantea	M	lotgi1|219492	LC-MS/MS
GLEAN3_00164		150	nothing at 75%;	Mann et al. 2010 Proteome Sci	Strongylocentrotus	purpuratus	E	ref|XP_003726194.1|	teeth; LC-MS; EPGFFGSFLREVT
00164 1a,(b),(d)		150	sm30; nothing at 75%; Sp-Clect/similar to SM30	Mann et al. 2010	Strongylocentrotus	purpuratus	E	ref|XP_003726194.1|	LC-MS
GLEAN3_25068	152	152	nothing at 75%;	Mann et al. 2008b Proteome Sci	Strongylocentrotus	purpuratus	E	ref|XP_798173.1|	LC-MS;
25068 1a,b,c		152	nothing at 75%; Sp-Ttrspn_19 (tetraspanin; emPAI and coverage calculated for the extracellular part)	Mann et al. 2010 Proteome	Strongylocentrotus	purpuratus	E	ref|XP_798173.1|	LC-MS
GLEAN3_07231	152	152	nothing at 75%;	Mann et al. 2008b Proteome Sci	Strongylocentrotus	purpuratus	E	ref|XP_800780.2	LC-MS; DDIDKLVDDNMTDLQK LVDDNMTDLQK
GLEAN3_21260		153	nothing at 75%;	Mann et al. 2008b Proteome Sci	Strongylocentrotus	purpuratus	E	ref|XP_001189231.2|	LC-MS;
GLEAN3_21260		153	nothing at 75%;	Mann et al. 2008b Proteome Sci	Strongylocentrotus	purpuratus	E	ref|XP_001189231.2|	LC-MS;
25235 1a,b,c,d		154	nephronectin; nothing at 75%; Sp-Npnt (nephronectin)/similar to Egfl6-prov protein	Mann et al. 2010	Strongylocentrotus	purpuratus	E	ref|XP_787321.3	LC-MS
GLEAN3_25235		154	nothing at 75%;	Mann et al. 2008b Proteome Sci	Strongylocentrotus	purpuratus	E	ref|XP_787321.3|	LC-MS;
GLEAN3_23217		155	nothing at 75%;	Mann et al. 2008b Proteome Sci	Strongylocentrotus	purpuratus	E	ref|XP_786730.1|	LC-MS;
23217 1(b),c		155	nothing at 75%; Sp-Ran	Mann et al. 2010	Strongylocentrotus	purpuratus	E	ref|XP_786730.1|	LC-MS
lotgi1|104069		155	Ran-1	Mann et al. 2012	Lottia	gigantea	M	lotgi1|104069	LC-MS
EKC36560.1		155	GTP binding nuclear protein Ran	Zhang et al. 2012	Crassostrea	gigas	M	EKC36560.1	LC-MS
Other cyclophilins SPU_008305 –1.61 r +1.02 Peptidylpropyl cis-trans isomerases	156	156	cyclophilin; same as GLEAN3_08305	Todgham & Hofmann 2009 J. exp. Biol..	Strongylocentrotus	purpuratus	E		values are upper and lower limit of fold change for 540ppm versus 380ppm; microarray analysis; larvae; 40hr
GLEAN3_08305		156	cyclophilin; same as GLEAN3_08305	Mann et al. 2008b Proteome Sci	Strongylocentrotus	purpuratus	E	ref|XP_790143.2	LC-MS; VAQGSDVIK
cyclophilin 2 SPU_007484 –1.53 r –1.07 Peptidylpropyl cis-trans isomerases		156	cyclophilin	Todgham & Hofmann 2009 J. exp. Biol..	Strongylocentrotus	purpuratus	E		values are upper and lower limit of fold change for 540ppm (7.96) versus 380ppm 8.01); 40hr microarray analysis; larvae
lotgi1|223760		156	peptidyl-prolyl cis/trans isomerase	Mann et al. 2012	Lottia	gigantea	M	lotgi1|223760	LC-MS/MS
lotgi1|222979	156	156	peptidyl-prolys cis/trans isomerase	Mann et al. 2012	Lottia	gigantea	M	lotgi1|222979	LC-MS/MS
EKC37379.1	156	156	peptidyl-prolyl cis/trans isomerase B	Zhang et al. 2012	Crassostrea	gigas	M	EKC37379.1	LC-MS/MS
lotgi1|212757	156	156	peptidyl-prolyl cis/trans isomerase B	Mann et al. 2012	Lottia	gigantea	M	lotgi1|212757	LC-MS/MS
EKC37378.1	156	156	peptidyl-prolys cis/trans isomerase C	Zhang et al. 2012	Crassostrea	gigas	M	EKC37378.1	LC-MS/MS
07484 1a,b	156	156	cyclophilin; Sp-Cycpln/cyclophilin 1	Mann et al. 2010 Proteome	Strongylocentrotus	purpuratus	E	ref|NP_001028819.1|	LC-MS
GLEAN3_12112	157	157	nothing at 75%;	Mann et al. 2008b Proteome Sci	Strongylocentrotus	purpuratus	E	ref|XP_783878.1	LC-MS;
lotgi1|222012		157	rab5	Mann et al. 2012	Lottia	gigantea	M	lotgi1|222012	LC-MS/MS
12112 1b,d		157	nothing at 75%; Sp-Rab5l; shares 1 peptide with Glean3:27060 (Sp-Rab5)	Mann et al. 2010	Strongylocentrotus	purpuratus	E	ref|XP_783878.1|	LC-MS
17072		157	nothing at 75%; Sp-Rab8; shares peptides with 7 other Rab proteins (see Additional file 3)	Mann et al. 2010	Strongylocentrotus	purpuratus	E	ref|XP_781611.3|	LC-MS
lotgi1|201174		157	rab1a	Mann et al. 2012	Lottia	gigantea	M	lotgi1|201174	LC-MS/MS
Uncharacterized skeletal organic matrix protein-8 (USOMP-8)	157	157	seqeunce added	Ramos-Silva et al. 2013 Mar Biol Evol	Acropora	millepora	C	JT014391	LC-MS/MS
16790	313	157	nothing at 75%; Sp-Rac; shares 1 peptide with Glean3:10545 (Sp-Racl1)	Mann et al. 2010	Strongylocentrotus	purpuratus	E	ref|NP_001229596.1|	LC-MS
5779	313	157	nothing at 75%; Sp-Rap1/similar to Rap1b-prov	Mann et al. 2010	Strongylocentrotus	purpuratus	E	ref|XP_785316.2|	LC-MS
lotgi1|226838	157	157	ras-like protien	Mann et al. 2012	Lottia	gigantea	M	lotgi1|226838	LC-MS/MS
lotgi1|199128		157	to Cdc24-like protein/small GTPase family	Mann et al. 2012	Lottia	gigantea	M	lotgi1|199128	LC-MS/MS
lotgi1|230301		157	Ras-related Rac	Mann et al. 2012	Lottia	gigantea	M	lotgi1|230301	LC-MS/MS
lotgi1|205560	157	157	ras-related rab1a	Mann et al. 2012	Lottia	gigantea	M	lotgi1|205560	LC-MS/MS
lotgi1|230007	157	157	rab6	Mann et al. 2012	Lottia	gigantea	M	lotgi1|230007	LC-MS/MS
lotgi1|198201	157	157	ras-related gtpase	Mann et al. 2012	Lottia	gigantea	M	lotgi1|198201	LC-MS/MS
lotgi1|187701	157	157	rab small gtpase	Mann et al. 2012	Lottia	gigantea	M	lotgi1|187701	LC-MS/MS
lotgi1|223383	157	157	rab7	Mann et al. 2012	Lottia	gigantea	M	lotgi1|223383	LC-MS/MS
lotgi1|193895	157	157	ras-related gtpase	Mann et al. 2012	Lottia	gigantea	M	lotgi1|193895	LC-MS/MS
lotgi1|225073		157	rab11	Mann et al. 2012	Lottia	gigantea	M	lotgi1|225073	LC-MS/MS
lotgi1|207113	157	157	rho-like protein	Mann et al. 2012	Lottia	gigantea	M	lotgi1|207113	LC-MS/MS
GLEAN3_00503	157	157	nothing at 75%;	Mann et al. 2008b Proteome Sci	Strongylocentrotus	purpuratus	E	ref|NP_001116984.1	LC-MS; VVLIGDSGVGK
N19		159	n19; nothing at 75%	Yano et al. 2007	Pinctada	fucata	M	BAF76073.1
Contig_90c_12029_4		159	nothing at 75%; N19 (Nacre Protein)	Joubert et al. 2010	Pinctada	margaritifera	M
AP24 GenBank AAK00634.1 146 intra		161	ap24; nothing at 75%	Evans 2012 Bioinformatics			M		Bioinformatics
AP24		161	nothing at 75%	Michenfelder et al. 2003	Haliotis	rufescens	M	AF225915
IMSP-5		162	nothing at 75%; ca-binding	Marie et al. 2011 Mar Biotechnol	Venerupis	philippinarum	M	AM874357; AYDIDGNNK	MS/MS
IMSP-2		162	nothing at 75%; novel	Marie et al. 2011 Mar Biotechnol	Venerupis	philippinarum	M	AM874357; PITAFK VSFIGTYFK VQDSTNLAVEHLAGQLK	MS/MS
GLEAN3_02503		163	nothing at 75%;	Mann et al. 2008b Proteome Sci	Strongylocentrotus	purpuratus	E	sp|P08991.1|H2AV_STRPU	LC-MS; AGLQFPVGR HLQLAVR STELLIR YRPGTVALR
GLEAN3_24890		163	nothing at 75%;	Mann et al. 2008b Proteome Sci	Strongylocentrotus	purpuratus	E	sp|P08991.1|H2AV_STRPU	LC-MS;
lotgi1|181153	163	163	histone H2A	Mann et al. 2012	Lottia	gigantea	M	lotgi1|181153	LC-MS/MS
CL226 [DW986253]		166	nothing at 75%	Marie et al. 2010 Prot Sci	Haliotis	asinina	M
ML3D4 [DW986253]		166	nothing at 75%	Marie et al. 2010 Prot Sci	Haliotis	asinina	M
AP7		167	nothing at 75%	Michenfelder et al. 2003	Haliotis	rufescens	M	AF225916
Perlustrin		168	perlustrin; nothing at 75%	Weiss et al. 2000	Haliotis	laevigata	M	swissprot; P82595
lotgi1|238970	168	168	perlustrin	Mann et al. 2012	Lottia	gigantea	M	lotgi1|238970	LC-MS/MS
GLEAN3_15870;27123		169	nothing at 75%;	Mann et al. 2010 Proteome Sci	Strongylocentrotus	purpuratus	E	ref|XP_001197324.2|	test, LC-MS; EEVKDESEESDDD KDESEESDDDMGF
GLEAN3_15870;27123		169	nothing at 75%;	Mann et al. 2010 Proteome Sci	Strongylocentrotus	purpuratus	E	ref|XP_001197324.2|	test, LC-MS; EEVKDESEESDDD KDESEESDDDMGF
Calprismin		170	CalP; nothing at 75%	Marin et al. 2005	Pinna	nobilis	M	P83631.2
Calprismin		170	calprismin	Marin et al. 2005	Pinna	nobilis	M		N-terminal: ITIEQGELVLNCISDKMMCEFEAAAEMVVPSPCPSEYDTCILETNIPPANQXPVHXIPXMH
perlinhibin		171	perinhibin; nothing at 75%	Mann et al. 2007 Biophys J	Haliotis	laevigata	M	P85035.1	aragonite;N-terminal; ECTIGDSCVVHRHCRECRCPRGRAM CDREHHKPPHCSCHIH
Perlinhibin Swiss-Prot P85035.1 41 intra		171	perlinhibin; nothing at 75%	Evans 2012 Bioinformatics			M		Bioinformatics
Perlinhibin-r Swiss-Prot P85036.1 42 intra		171	perlinhibin; nothing at 75%	Evans 2012 Bioinformatics			M		Bioinformatics
Conchiolin H		173	conchiolin; nothing at 75%	Bowen & Tang 1996	12 species	12 species	M	P0CAY9.1 Pinctada maxima
p20		173	p20; nothing at 75%	Bedouet et al. 2001	Pinctada	maxima	M	P0CAY9.1
48kDa		174	nothing at 75%	Rahman et al. 2006	Lobophytum	crassum	C		Nterminal
48kDa		174	nothing at 75%;	Rahman et al. 2006 Calc Tiss Intnl	Lobophytum	crassum	C	Nterm	N-terminal; GEVVFELKEEEIKDGFGEFA
Protocadherin-like		200	cadherin; nothing at 75%	Ramos-Silva et al. 2013 Mar Biol Evol	Acropora	millepora	C	JT011093	LC-MS/MS
g11108		200	cadherin; nothing at 75%	Drake et al. 2013	Stylophora	pistillata	c	KC509947	LC-MS/MS
g10811		200	cadherin; nothing at 75%	Drake et al. 2013	Stylophora	pistillata	c	KC000002	LC-MS/MS
g11107		200	cadherin; nothing at 75%	Drake et al. 2013	Stylophora	pistillata	c	KC509948	LC-MS/MS
lotgi1|106548	200	200	notch-like	Mann et al. 2012	Lottia	gigantea	M	lotgi1|106548	LC-MS/MS
Other collagens SPU_009076 –1.56 r +1.00 Mostly fibrillar collagens	201	201	collagen	Todgham & Hofmann 2009 J. exp. Biol..	Strongylocentrotus	purpuratus	E		values are upper and lower limit of fold change for 540ppm versus 380ppm; microarray analysis; larvae; 40hr
MPN GenBank ADO33190.1 673 frame		201	mollscan shell prismin nacre protein	Evans 2012 Bioinformatics			M		Bioinformatics
Contig_90c_3996_3		201	mollscan shell prismin nacre protein; hypothetical protein (pfp-16)	Joubert et al. 2010	Pinctada	margaritifera	M
Contig_90c_51_2		201	mollscan shell prismin nacre protein/mpn88-lack6	Joubert et al. 2010	Pinctada	margaritifera	M	not publically available
MPN88 GenBank BAH05007 986 frame	201	201	mpsn88; nothing at 75%	Evans 2012 Bioinformatics			M		Bioinformatics
perlwapin		201	perlwapin	Treccani et al. 2006	Haliotis	laevigata	M	P84811.1	aragonite; protein extraction & HPLC
Perlwapin Swiss-Prot P84811.1 134 intra		201	perlwapin	Evans 2012 Bioinformatics			M		Bioinformatics
ML3E9 [DW986256]	201	201	perlwapin	Marie et al. 2010 Prot Sci	Haliotis	asinina	M
Shematrin1		201	shematrin; same as 90c_600_4	Yano et al., 2006	Pinctada	fucata	M	BAE93433.1
Contig_90c_600_4		201	shematrin; same as bae93433; MSI 60 (insoluble protein)	Joubert et al. 2010	Pinctada	margaritifera	M	not publically available
Contig_90c_334_6		201	nothing at 75%; Prismalin-14	Joubert et al. 2010	Pinctada	margaritifera	M	BAM71010.1
Prismalin-14		201	prismalin14	Suzuki et al. 2004	Pinctada	fucata	M	BAD27406.1
Prismalin-14		201	prismalin14	Suzuki et al 2004, J Biochem	Pinctada	fucata	M	AB159512
Contig_90c_148_5	201	201	Shematrin-8/shematrin	Joubert et al. 2010	Pinctada	margaritifera	M	ABO92760
Contig_90c_441_3		201	shematrin; same as abo92760; Pm shem 1 for shematrin	Joubert et al. 2010	Pinctada	margaritifera	M	not publically available
Contig_90c_1350_1		201	shematrin/MSI7 (glycine-rich shell matrix protein)	Joubert et al. 2010	Pinctada	margaritifera	M
Contig_90c_942_2		201	Shematrin-9/shematrin	Joubert et al. 2010	Pinctada	margaritifera	M	ABO92761
Contig_90c_3172_4		201	shematrin/Pm shem 3 for shematrin	Joubert et al. 2010	Pinctada	margaritifera	M	not publically available
Shematrin2		201	shematrin; nothing at 75%;	Yano et al., 2006	Pinctada	fucata	M	BAE93434.1
MSI31		201	msi31; nothing at 75%	Sudo et al. 1997	Pinctada	fucata	M	trEMBL; O02401
Gly 37 GenBank BAA20465.1 315 frame		201	same as O02401	Evans 2012 Bioinformatics			M		Bioinformatics
MSI7		201	msi7; nothing at 75%	Zhang et al. 2003	Pinctada	fucata	M	trEMBL; Q7YWA5
Gly 7.5 GenBank AAQ08227.1 76 frame		201	same as Q7YWA5	Evans 2012 Bioinformatics			M		Bioinformatics
Contig_90c_19664_1		201	nothing at 75%; Shematrin-4	Joubert et al. 2010	Pinctada	margaritifera	M
Shematrin4		201	shematrin; nothing at 75%;	Yano et al., 2006	Pinctada	fucata	M	BAE93436.1
Prisilkin-39		201	prisilkin; nothing at 75%	Kong et al. 2009	Pinctada	fucata	M	ACJ06766
Shematrin3		201	shematrin; nothing at 75%;	Yano et al., 2006	Pinctada	fucata	M	BAE93435.1
Shematrin6		201	shematrin; nothing at 75%;	Yano et al., 2006	Pinctada	fucata	M	BAE93438.1
MSP-1	201	201	molluscan shell protein	Sarashina & Endo 1998, 2001	Painopecten	yessoensis	M	trEMBL; Q95yf6	cDNA
MSP2		201	molluscan shell protein	Hasegawa 2005 Fish. Sci.	Painopecten	yessoensis	M	BAB70697.1	cDNA
15708	201	201	coll4alpha; same as glean3_15708Sp-Col4a2 (alpha2(IV)-like collagen)	Mann et al. 2010	Strongylocentrotus	purpuratus	E	ref|NP_999676.1|	LC-MS
COLP4α SPU_015708 –1.69 r +1.07 Next most abundant collagen, non-fibrillar collagen		201	coll4alpha; same as np_999676; Sp-Col4a2 (alpha2(IV)-like collagen)	Todgham & Hofmann 2009 J. exp. Biol..	Strongylocentrotus	purpuratus	E		values are upper and lower limit of fold change for 540ppm versus 380ppm; microarray analysis; larvae; 40hr
COLP3α SPU_003768 –1.53 r –1.02 Most abundant collagen in PMCs, non-fibrillar collagen		201	collagen; nothing at 75%	Todgham & Hofmann 2009 J. exp. Biol..	Strongylocentrotus	purpuratus	E		values are upper and lower limit of fold change for 540ppm versus 380ppm; microarray analysis; larvae; 40hr
GLEAN3_26008		201	nothing at 75%;	Mann et al. 2008b Proteome Sci	Strongylocentrotus	purpuratus	E	ref|NP_999674.1|	LC-MS;
GLEAN3_26008		201	nothing at 75%;	Mann et al. 2008b Proteome Sci	Strongylocentrotus	purpuratus	E	ref|NP_999674.1|	LC-MS;
GLEAN3_05167		201	nothing at 75%;	Mann et al. 2008b Proteome Sci	Strongylocentrotus	purpuratus	E	ref|XP_780851.3|	LC-MS;
GLEAN3_26009	201	201	nothing at 75%;	Mann et al. 2008b Proteome Sci	Strongylocentrotus	purpuratus	E	ref|NP_999675.1|	LC-MS;
Other collagens SPU_022116 –1.63 r +1.05 Mostly fibrillar collagens		201	collagen; nothing at 75%	Todgham & Hofmann 2009 J. exp. Biol..	Strongylocentrotus	purpuratus	E		values are upper and lower limit of fold change for 540ppm versus 380ppm; microarray analysis; larvae; 40hr
Collagen		201	collagen; same as jr991083; nothing at 75%	Hayward et al. 2011	Acropora	millepora	C	A26
Contig_90c_8234_1	201	201	nothing at 75%; Shematrin-7	Joubert et al. 2010	Pinctada	margaritifera	M	not publically available
Shematrin7		201	shematrin; nothing at 75%;	Yano et al., 2006	Pinctada	fucata	M	BAE93439.1
Lustrin A	201	201	not found	Shen et al. 1997	Haliotis	rufescens	M	AF023459
Cluster020627	201	201	nothing at 75%; ECR	Moya et al. 2012	Acropora	millepora	C	JR981811.1
Contig_90c_86_6	201	201	nothing at 75%; Perlwapin	Joubert et al. 2010	Pinctada	margaritifera	M
Cluster000208		202	nothing at 75%; ECR	Moya et al. 2012	Acropora	millepora	C	JR992439
Cluster039606		202	nothing at 75%; ECR	Moya et al. 2012	Acropora	millepora	C	JT013534.1
Mucin-like		203	mucin; nothing at 75%;	Ramos-Silva et al. 2013 Mar Biol Evol	Acropora	millepora	C	JR987773	LC-MS/MS
g6918		203	sushi domain; nothing at 75%	Drake et al. 2013	Stylophora	pistillata	c	KC342194	LC-MS/MS
24022		204	nephrin; nothing at 75%; Sp-Hypp_1101/similar to nephrin; domains: IGcam	Mann et al. 2010	Strongylocentrotus	purpuratus	E	ref|XP_786549.3|	LC-MS
24019 1a,b		204	nephrin; nothing at 75%; Sp-nephl/similar to nephrin;domains: IG, FN3; shares 3 peptides with Glean3:19665 (Sp-Hypp_941)	Mann et al. 2010	Strongylocentrotus	purpuratus	E	ref|XP_786159.3|	LC-MS
Contig_90c_581_4		208	nothing at 75%; Shematrin-5	Joubert et al. 2010	Pinctada	margaritifera	M	not publically available
Shematrin5		208	shematrin; nothing at 75%;	Yano et al., 2006	Pinctada	fucata	M	BAE93437.1
DOMON domain		209	domon; nothing at 75%	Hayward et al. 2011	Acropora	millepora	C	B5
DOMON domain		209	domon; nothing at 75%	Hayward et al. 2011	Acropora	millepora	C	B93
GLEAN3_03825		211	nothing at 75%;	Mann et al. 2008b Proteome Sci	Strongylocentrotus	purpuratus	E	gb|ABX45049.1|	LC-MS;
lotgi1|205379	211	211	14-3-3 protein b	Mann et al. 2012	Lottia	gigantea	M	lotgi1|205379	LC-MS/MS
lotgi1|207549	211	211	tyrosine 3-monooxygenase activation	Mann et al. 2012	Lottia	gigantea	M	lotgi1|207549	LC-MS/MS
logi1|222442	211	211	14-3-3 gamma protein	Mann et al. 2012	Lottia	gigantea	M	logi1|222442	LC-MS/MS
14594 1(a),b,c		211	nothing at 75%; Sp-14-3-3_1; peptide set partially overlapping with Glean3:03825 (Sp-14-3-3ε), Glean3:22537 (Sp-14-3-3_2) and Glean3:11631	Mann et al. 2010	Strongylocentrotus	purpuratus	E	ref|XP_003727876.1|	LC-MS
GLEAN3_06211		212	nothing at 75%;	Mann et al. 2008b Proteome Sci	Strongylocentrotus	purpuratus	E	ref|XP_784460.3|	LC-MS;
14869 1a,b,c		212	thioredoxin peroxidase; nothing at 75%; Sp-prxdxn (thioredoxin-peroxidase); shares 1 peptide with Glean3:06211 (Sp-Pxr4)	Mann et al. 2010	Strongylocentrotus	purpuratus	E	ref|XP_786503.2|	LC-MS
lotgi1|123611		212	peroxiredoxin	Mann et al. 2012	Lottia	gigantea	M	lotgi1|123611	LC-MS/MS
lotgi1|150310		212	thioredoxin	Mann et al. 2012	Lottia	gigantea	M	lotgi1|150310	LC-MS/MS
lotgi1|183148		212	thioredoxin peroxidase	Mann et al. 2012	Lottia	gigantea	M	lotgi1|183148	LC-MS/MS
Contig_90c_697_5		213	nothing at 75%; Mantle gene 2	Joubert et al. 2010	Pinctada	margaritifera	M
PFMG2 GenBank AZZ76256.1 170 pearl		213	pfmg2	Evans 2012 Bioinformatics			M		Bioinformatics
lotgi1|203275	213	213	transgelin/calponin	Mann et al. 2012	Lottia	gigantea	M	lotgi1|203275	LC-MS/MS
26944 1d		214	adp ribosylation factor; nothing at 75%; Sp-Arf1l1 (ADP-ribosylation factor 1_like 1); shares 1 peptide with Glean3:00552 (Sp-Arf1), Glean3:03162 (Sp-Arf1l2) and Glean3:03496 (Sp-Arf4/5)	Mann et al. 2010	Strongylocentrotus	purpuratus	E	XP_791037.1	LC-MS
GLEAN3_00552		214	nothing at 75%;	Mann et al. 2008b Proteome Sci	Strongylocentrotus	purpuratus	E	ref|XP_780019.2	LC-MS; ILMVGLDAAGK
lotgi1|231498		214	ADP ribosylation factor	Mann et al. 2012	Lottia	gigantea	M	lotgi1|231498	LC-MS/MS
lotgi1|236204		214	ADP ribosylation factor	Mann et al. 2012	Lottia	gigantea	M	lotgi1|236204	LC-MS/MS
lotgi1|210455	214	214	GTP-binding SAR1P	Mann et al. 2012	Lottia	gigantea	M	lotgi1|210455	LC-MS/MS
Contig_90c_3116_2		215	nothing at 75%; C-type lectin 2	Joubert et al. 2010	Pinctada	margaritifera	M
298867_2192_0444_6		215	nothing at 75%; Incilarin C	Joubert et al. 2010	Pinctada	margaritifera	M
Contig_90c_795_6		216	nothing at 75%; Mantle protein 12	Joubert et al. 2010	Pinctada	margaritifera	M
PFMG12 GenBank AZZ22321.1 137 pearl		216	pfmg	Evans 2012 Bioinformatics	Pinctada	fucata	M		Bioinformatics
Contig_90c_19560_2		217	nothing at 75%; Mantle gene 4	Joubert et al. 2010	Pinctada	margaritifera	M
PFMG4 GenBank AZZ76258.1 139 pearl		217	pfmg4	Evans 2012 Bioinformatics	Pinctada	fucata	M		Bioinformatics
EKC23000.1	217	217	Complement C1q tumor necrosis factor-related protein 3	Zhang et al. 2012	Crassostrea	gigas	M	EKC23000.1	LC-MS/MS
Coadhesin	251	251	nothing at 75%;	Ramos-Silva et al. 2013 Mar Biol Evol	Acropora	millepora	C	JT016638	LC-MS/MS
g12510		251	thrombospondin; nothing at 75%	Drake et al. 2013	Stylophora	pistillata	c	KC342189	LC-MS/MS
g11674	251	251	hemicentin; nothing at 75%	Drake et al. 2013	Stylophora	pistillata	c	KC150884	LC-MS/MS
Cluster030641		252	nothing at 75%; ECR	Moya et al. 2012	Acropora	millepora	C	JR989905.1
21193		252	thrombospondin; nothing at 75%; Sp-Adam/TS16/18L/similar to ADAM metallopeptidase with thrombospondin type 1 motif, 16 preproprotein		Strongylocentrotus	purpuratus	E	ref|XP_780466.3|	LC-MS
g20041		253	contactin-associated; nothing at 75%	Drake et al. 2013	Stylophora	pistillata	c	KC342198	LC-MS/MS
EGF and laminin G domain-containing protein	253	253	laminin; nothing at 75%	Ramos-Silva et al. 2013 Mar Biol Evol	Acropora	millepora	C	JR980881	LC-MS/MS
g20420	253	253	neurexin; nothing at 75%	Drake et al. 2013	Stylophora	pistillata	c	KC479169	LC-MS/MS
MSI25	254	254	msi25	cited in Kinoshita et al. 2011	Pinctada	fucata	M	AB210136
MSI60		254	msi60nothing at 75%	Marie et al. 2011 J. Mol. Evol.	Mytilus	californianus	M	P86857]	TOF-MS/MS
MSI60	254	254	msi60nothing at 75%	Shen et al. 1997, Sudo et al. 1997	Pinctada	fucata	M	trEMBL; O02402
HasCL10contig2 [EZ420619]	254	254	nothing at 75%	Marie et al. 2010 Prot Sci	Haliotis	asinina	M
g9951		255	collagen; nothing at 75%	Drake et al. 2013	Stylophora	pistillata	c	KC342195	LC-MS/MS
g810		255	collagen; nothing at 75%	Drake et al. 2013	Stylophora	pistillata	c	KC342197	LC-MS/MS
g7349	256	256	carbonic anhydrase; same as ace95141	Drake et al. 2013	Stylophora	pistillata	c	EU532164.1	LC-MS/MS
STPCA2		256	carbonic anhydrase; same as p35	Bertucci et al. 2011/Drake et al 2013	Stylophora	pistillata	C	ACE95141.1
Cluster013858		256	same as jr973601; CA	Moya et al. 2012	Acropora	millepora	C	JR995761.1
Cluster027688		256	same as jr995761; CA	Moya et al. 2012	Acropora	millepora	C	JR973601.1
Cluster015947		256	same as jr002659; CA	Moya et al. 2012	Acropora	millepora	C	JR998380.1
Cluster015125		256	same as jr998380; CA	Moya et al. 2012	Acropora	millepora	C	JT002659.1
Cluster027049		256	nothing at 75%; CA	Moya et al. 2012	Acropora	millepora	C	JT014542.1
Cluster017121		256	nothing at 75%; CA	Moya et al. 2012	Acropora	millepora	C	JR989434.1
Cluster008209	256	256	nothing at 75%; CA	Moya et al. 2012	Acropora	millepora	C	JT018935.1
Cluster015452		256	nothing at 75%; CA	Moya et al. 2012	Acropora	millepora	C	JR979146.1
STPCA		256	carbonic anhydrase	Moya et al. 2008	Stylophora	pistillata	C	ACA53457.1	cDNA, immunolocalization
Cluster008550	256	256	nothing at 75%; CA	Moya et al. 2012	Acropora	millepora	C	JR996464.1
Cluster042768	256	256	nothing at 75%; CA	Moya et al. 2012	Acropora	millepora	C	JR990087.1
20636		257	copine; ntohing at 75%; Sp-CopineD/similar to Copine VIII; shares 2 peptides with Glean3:08019 (Sp-CopineL)	Mann et al. 2010	Strongylocentrotus	purpuratus	E	XP_001178483.2	LC-MS
9516		257	vonwillbrandfactor; nothing at 75%; Sp-CopineA/hypothetical protein; domains: C2,vWFA	Mann et al. 2010	Strongylocentrotus	purpuratus	E	ref|XP_003724722.1	LC-MS
Cluster009017		258	nothing at 75%; ECR	Moya et al. 2012	Acropora	millepora	C	JR978826
Cluster015755		258	nothing at 75%; ECR	Moya et al. 2012	Acropora	millepora	C	JR983626.1
CUB and peptidase domain-containing protein 1		259	cub domain; nothing at 75%	Ramos-Silva et al. 2013 Mar Biol Evol	Acropora	millepora	C	JR970990	LC-MS/MS
CUB and peptidase domain-containing protein 2		259	cub domain; nothing at 75%	Ramos-Silva et al. 2013 Mar Biol Evol	Acropora	millepora	C	JT008002	LC-MS/MS
EKC18230	259	259	chymotrypsin-like serine protease	Zhang et al. 2012	Crassostrea	gigas	M	EKC18230	LC-MS/MS
13716 1(a)		262	sorcin; nothing at 75%; Sp-Sorc/similar to sorcin	Mann et al. 2010	Strongylocentrotus	purpuratus	E	ref|XP_003725036.1|	LC-MS
26365	262	262	sorcin; nothing at 75%; Sp-Sri (sorcin); domains: EFh; shares peptides with Glean3:26366	Mann et al. 2010	Strongylocentrotus	purpuratus	E	ref|XP_003727947.1	LC-MS
7550	262	262	peflin; nothing at 75%; Sp-Pef1_1 (peflin)/similar to apoptosis-linked gene 2	Mann et al. 2010	Strongylocentrotus	purpuratus	E	ref|XP_787000.2|	LC-MS
22779		262	programmed cell death; nothing at 75%; Sp-Pdcd6 (programmed cell death 6)/similar to apoptosis-linked gene 2	Mann et al. 2010	Strongylocentrotus	purpuratus	E	ref|XP_798681.3|	LC-MS
Contig_90c_95_3		263	nothing at 75%; Mantle protein 10	Joubert et al. 2010	Pinctada	margaritifera	M
PFMG10 GenBank AZZ22319.1 175 pearl		263	pfmg	Evans 2012 Bioinformatics	Pinctada	fucata	M		Bioinformatics
ACCBP		264	accbp; nothing at 75%	Ma et al. 2007	Pinctada	fucata	M	DQ473430.1
268637_2368_1695_5		264	nothing at 75%; Amorphous calcium carbonate binding protein 1 (ACCBP)	Joubert et al. 2010	Pinctada	margaritifera	M
ML1E6 [DW986219]		265	nothing at 75%	Marie et al. 2010 Prot Sci	Haliotis	asinina	M
6G3 [GD272908]		265	nothing at 75%	Marie et al. 2010 Prot Sci	Haliotis	asinina	M
GLEAN3_24730	267	267	nothing at 75%;	Mann et al. 2008b Proteome Sci	Strongylocentrotus	purpuratus	E	ref|XP_796152.1|	LC-MS;
GLEAN3_04876	267	267	nothing at 75%;	Mann et al. 2008b Proteome Sci	Strongylocentrotus	purpuratus	E	ref|XP_003730718.1	LC-MS; DALDLEK GGSIVFQDIK LMTFQNQR
Contig_90c_117_4	267	267	krmp/ferritin-like/	Joubert et al. 2010	Pinctada	margaritifera	M	not publically available
lotgi1|123691	267	267	ferritin	Mann et al. 2012	Lottia	gigantea	M	lotgi1|123691	LC-MS/MS
lotgi1|178880	267	267	ferritin	Mann et al. 2012	Lottia	gigantea	M	lotgi1|178880	LC-MS/MS
MSUP-3		268	msup3; nothing at 75%	Marie et al. 2011 J. Mol. Evol.	Mytilus	edulis, galloprovincialis, & californianus	M	P86859]	TOF-MS/MS
21 kDa		268	nothing at 75%	Keith et al. 1993	Mytilus	edulis	M
Cluster000102	300	300	nothing at 75%; ECR	Moya et al. 2012	Acropora	millepora	C	JT001050.1
Cluster000928	300	300	nothing at 75%; ECR	Moya et al. 2012	Acropora	millepora	C	JR988466
Cluster022357	300	300	nothing at 75%; ECR	Moya et al. 2012	Acropora	millepora	C	JR997069.1
Cluster027963	300	300	nothing at 75%; ECR	Moya et al. 2012	Acropora	millepora	C	JR976200.1
18529	301	301	domon; nothing at 75%; Hypothetical protein; domains: DM13, Domon	Mann et al. 2010	Strongylocentrotus	purpuratus	E	ref|XP_780786.2|	LC-MS
25499	301	301	domon; nothing at 75%; Sp-Hypp_1150; domains: DM13, DOMON, partial SRCR	Mann et al. 2010	Strongylocentrotus	purpuratus	E	ref|XP_784267.3|	LC-MS
6029	301	301	knickkopf; nothing at 75%; Sp-Knkl (knickkopf-like); shares 1 peptide with Glean3:05664 (Sp-Hypp_1594)	Mann et al. 2010	Strongylocentrotus	purpuratus	E	XP_001185970.2	LC-MS
vW TSP domain	302	302	nothing at 75%	Hayward et al. 2011	Acropora	millepora	C	A9
cnidarian egg lectin isoform d	302	302	nothing at 75%	Hayward et al. 2011	Acropora	millepora	C	A90
vW TSP domain	302	302	nothing at 75%	Hayward et al. 2011	Acropora	millepora	C	A102
Cluster016915	303	303	nothing at 75%; ECR	Moya et al. 2012	Acropora	millepora	C	JR971033.1
Cluster044300	303	303	nothing at 75%; ECR	Moya et al. 2012	Acropora	millepora	C	JT010866.1
Cluster051598	303	303	nothing at 75%; ECR	Moya et al. 2012	Acropora	millepora	C	JT014757.1
Cluster028976	304	304	nothing at 75%; ECR	Moya et al. 2012	Acropora	millepora	C	JT009428.1
lotgi1|99791	304	304	uncharacterized protein	Mann et al. 2012	Lottia	gigantea	M	lotgi1|99791	LC-MS/MS
lotgi1|99852	304	304	uncharacterized protein	Mann et al. 2012	Lottia	gigantea	M	lotgi1|99852	LC-MS/MS
13889	304	304	peroxidasin; nothing at 75%l Sp-Pxdn (peroxidasin-like)	Mann et al. 2010	Strongylocentrotus	purpuratus	E	ref|XP_797821.3|	LC-MS
09922 1(a),(b)	305	305	golgi apparatus protein; nothing at 75%; Sp-Cys-rich_fgfr_1/similar to Golgi apparatus protein 1/similar to ENSANGP00000020376 (aa831-1085); domains: Cys-rich repeats; shares 3 peptides with Glean3:08505 (Sp-Cys_rich_fgfr)	Mann et al. 2010	Strongylocentrotus	purpuratus	E	ref|XP_003724651.1|	LC-MS
08505 1a,b	305	305	golgi apparatus protein; nothing at 755; Sp-Cys-rich_fgfr (similar to Golgi apparatus protein 1)/ similar to ENSANGP00000020376, partial; shares 4 peptides with Glean3:18130 (Sp-Cys-rich_fgfr_2) and 1 peptide with Glean3:19782 (Sp-Cys-rich_fgfr_3)	Mann et al. 2010	Strongylocentrotus	purpuratus	E	ref|XP_789991.3|	LC-MS
27885 1a	306	306	ceruloplasmin; nothing at 75%; Sp-Cp (ceruloplasmin)/hephaestin-like	Mann et al. 2010	Strongylocentrotus	purpuratus	E	ref|XP_791569.3|	LC-MS
lotgi1|83160	306	306	hephaestin/ceruloplasmin	Mann et al. 2012	Lottia	gigantea	M	lotgi1|83160	LC-MS/MS
lotgi1|115607	306	306	uncharacterized/ceruloplasmin	Mann et al. 2012	Lottia	gigantea	M	lotgi1|115607	LC-MS/MS
Hephaestin-like	306	306	hephaestin; nothing at 75%	Ramos-Silva et al. 2013 Mar Biol Evol	Acropora	millepora	C	JT019463	LC-MS/MS
17641	307	307	nothing at 75%; Sp_Hypp_887	Mann et al. 2010	Strongylocentrotus	purpuratus	E	XP_003729021.1	LC-MS
17630	307	307	nothing at 75%; Sp-Hypp_885	Mann et al. 2010	Strongylocentrotus	purpuratus	E	ref|XP_801877.1|	LC-MS
lotgi1|203811	307	307	uncharacterized protein	Mann et al. 2012	Lottia	gigantea	M	lotgi1|203811	LC-MS/MS
Glu-rich protein	308	308	glu-rich; nothing at 75%	Ramos-Silva et al. 2013 Mar Biol Evol	Acropora	millepora	C	JR983175 (EZ022623)	LC-MS/MS
CARP3	308	308	nothing at 75%	Mass et al 2013 CB	Stylophora	pistillata	c	AGE35226.1
12786	309	309	bone morphogenic protein; nothing at 75%; Sp-Bmp5/6/7/8 (bone morphogenetic protein)	Mann et al. 2010	Strongylocentrotus	purpuratus	E	NP_999820.1	LC-MS
Contig_90c_1652_1	309	309	nothing at 75%; BMP2/4	Joubert et al. 2010	Pinctada	margaritifera	M
Contig_90c_24_4	310	310	nothing at 75%; Shematrin-6	Joubert et al. 2010	Pinctada	margaritifera	M	not publically available
Contig_90c_131_4	310	310	nothing at 75%; Tyrosinase-like protein 1 (Pfty1)	Joubert et al. 2010	Pinctada	margaritifera	M	not publically available
EKC24431.1	310	310	histone-lysine n-methyl transferase	Zhang et al. 2012	Crassostrea	gigas	M	EKC24431.1	LC-MS/MS
EKC36282.1	310	310	tyrosinease-like protein tyr-3	Zhang et al. 2012	Crassostrea	gigas	M	EKC36282.1	LC-MS/MS
EKC18549.1	310	310	tyrosinease-like protein tyr-3	Zhang et al. 2012	Crassostrea	gigas	M	EKC18549.1	LC-MS/MS
EKC18551.1	310	310	tyrosinease-like protein tyr-3	Zhang et al. 2012	Crassostrea	gigas	M	EKC18551.1	LC-MS/MS
CUB domain-containing protein	311	311	cub domain; nothing at 75%	Ramos-Silva et al. 2013 Mar Biol Evol	Acropora	millepora	C	JR989025	LC-MS/MS
Threonine-rich protein	311	311	threonine rich; nothing at 75%	Ramos-Silva et al. 2013 Mar Biol Evol	Acropora	millepora	C	JT013896 (JT012917)	LC-MS/MS
EKC36586.1	701	701	hypothetical protein	Zhang et al. 2012	Crassostrea	gigas	M	EKC36586.1	LC-MS/MS
Contig_90c_275_3	312	312	nothing at 75%; Mantle protein 9	Joubert et al. 2010	Pinctada	margaritifera	M
PFMG9 GenBank AZZ22318.1 191 pearl	312	312	pfmg	Evans 2012 Bioinformatics	Pinctada	fucata	M		Bioinformatics
SpC_lectin	350	350	ctype lectin; nothing at 75%	Illies and Ettensohn 2002, Dev. Genes Evol.	Strongylocentrotus	purpuratus	E	AF519418.1
GLEAN3_18406	351	351	nothing at 75%;	Mann et al. 2008b Proteome Sci	Strongylocentrotus	purpuratus	E	ref|XP_003725268.1|	LC-MS;
GLEAN3_18406	351	351	nothing at 75%;	Mann et al. 2008b Proteome Sci	Strongylocentrotus	purpuratus	E	ref|XP_003725268.1|	LC-MS;
18406 1a,b,c,d	351	351	nothing at 75%; Sp-Hypp_2998; 30% Gly; shares peptides with 18407 (Sp-Hypp_2999)	Mann et al. 2010 Proteome	Strongylocentrotus	purpuratus	E	ref|XP_003725268.1|	LC-MS
Contig_90c_11769_5		352	nothing at 75%; neuronal calcium sensor-1	Joubert et al. 2010	Pinctada	margaritifera	M
22598 1a		400	angiopoietin; nothing at 75%; Sp-FReD/similar to angiopoietin-like protein, partial	Mann et al. 2010	Strongylocentrotus	purpuratus	E	ref|XP_786278.3|	LC-MS
992		401	anthrax toxin receptor; nothing at 75%; Sp-AnthrtrL_1/similar to anthrax toxin receptor 1;	Mann et al. 2010	Strongylocentrotus	purpuratus	E	ref|XP_782613.3	LC-MS
AP7 GenBank AAK00635.1 66 intra		402	ap7; nothing at 75%	Evans 2012 Bioinformatics			M		Bioinformatics
2550		403	apextrin; nothing at 75%; Sp-MacpfB.1/similar to apextrin; shares 2 peptides with Glean3:16546 (Sp-MacpfB.3/similar to apextrin) andGlean3:15144 (Sp-MacpfB.2/similar to apextrin)	Mann et al. 2010	Strongylocentrotus	purpuratus	E	XP_003728670.1	LC-MS
4885		404	apolipoprotein; nothing at 75%; Sp-Apod/similar to apolipoprotein D	Mann et al. 2010	Strongylocentrotus	purpuratus	E	ref|XP_001183266.1|	LC-MS
15537 1b		405	arrestin; nothing at 75%; Sp-Arrdc2L; domain:Arrestin_N	Mann et al. 2010	Strongylocentrotus	purpuratus	E	ref|XP_003729173.1|	LC-MS
17605 1(a),b		406	atp synthase; nothing at 75%; Sp-Atp5a1 (ATP synthase, α subunit)	Mann et al. 2010	Strongylocentrotus	purpuratus	E	ref|NP_999743.1|	LC-MS
lotgi1|206617		406	atp synthase	Mann et al. 2012	Lottia	gigantea	M	lotgi1|206617	LC-MS/MS
EKC39329.1		406	atp synthase	Zhang et al. 2012	Crassostrea	gigas	M	EKC39329.1	LC-MS/MS
05296 1a		407	atpb synthase; nothing at 75%; Sp-Atp5b/ATP synthase β subunit	Mann et al. 2010	Strongylocentrotus	purpuratus	E	ref|NP_001116974.1	LC-MS
lotgi1|201878		407	atp synthase	Mann et al. 2012	Lottia	gigantea	M	lotgi1|201878	LC-MS/MS
EKC39411.1		407	atp synthase	Zhang et al. 2012	Crassostrea	gigas	M	EKC39411.1	LC-MS/MS
CA10		408	ca10; nothing at 75%	Stumpp et al. 2011 Comp. Biochem. Physiol.	Strongylocentrotus	purpuratus	E	XP_784796.3	ph7.7 8.1% dec over cont 7d; RT-PCR; larvae
g1057		409	cadherin; nothing at 75%	Drake et al. 2013	Stylophora	pistillata	c	KC000004	LC-MS/MS
Contig_90c_17445_2		410	calcium-dependent protein kinase	Joubert et al. 2010	Pinctada	margaritifera	M
Putative carbonic anhydrase		411	carbonic anhydrase; nothing at 75%	Ramos-Silva et al. 2013 Mar Biol Evol	Acropora	millepora	C	JR998014	LC-MS/MS
Cephalotoxin-like protein		412	cephalotoxin; nothing at 75%	Ramos-Silva et al. 2013 Mar Biol Evol	Acropora	millepora	C	JR986059	LC-MS/MS
22778		413	charged multivesicular body protein; nothing at 75%; Sp-Chmp4b (charged multivesicular body protein 4b)	Mann et al. 2010	Strongylocentrotus	purpuratus	E	ref|XP_798689.2|	LC-MS
chitin-bd-like		414	chitinbd; nothing at 75%	Marie et al. 2011 J. Mol. Evol.	Mytilus	edulis, galloprovincialis, & californianus	M	P86860]	TOF-MS/MS
6123		415	cholinesterase; nothing at 75%; Sp-AchE (acetylcholine esterase)/similar to cholinesterase 2	Mann et al. 2010	Strongylocentrotus	purpuratus	E	ref|XP_003724695.1|	LC-MS
06172 1(a),b		416	cofilin; nothing at 75%; Sp-Cfln/similar to cofilin-related; domain: actin depolymerization factor	Mann et al. 2010	Strongylocentrotus	purpuratus	E	ref|XP_780054.3|	LC-MS
28887 1a,(b)		417	cystatin; nothing at 75%; Hypothetical protein/similar to cytoplasmic cystatin	Mann et al. 2010	Strongylocentrotus	purpuratus	E	ref|XP_784732.2|	LC-MS
lotgi1|229619	417	417	uncharacterized protein	Mann et al. 2012	Lottia	gigantea	M	lotgi1|229619	LC-MS/MS
22588		418	dnase; nothing at 75%; Sp-DNAse1_2	Mann et al. 2010	Strongylocentrotus	purpuratus	E	ref|XP_003725206.1|	LC-MS
DOMON domain		419	domon; nothing at 75%	Hayward et al. 2011	Acropora	millepora	C	B12
Ectin		420	ectin; nothing at 75%	Ramos-Silva et al. 2013 Mar Biol Evol	Acropora	millepora	C	JR978035	LC-MS/MS
15163		421	egg binding receptor; nothing at 75%; Sp-Ccp/Hyr/7tm/Gpcr/similar to egg bindin receptor 1	Mann et al. 2010	Strongylocentrotus	purpuratus	E	ref|XP_797426.2|	LC-MS
10829		422	elongation factor; nothing at 75%; Sp-Ef2 (elongation factor 2)	Mann et al. 2010	Strongylocentrotus	purpuratus	E	ref|XP_001175642.1|	LC-MS
lotgi1|199050		422	translation elongation factor	Mann et al. 2012	Lottia	gigantea	M	lotgi1|199050	LC-MS/MS
EN		423	en; nothing at 75%	Stumpp et al. 2011 Comp. Biochem. Physiol.	Strongylocentrotus	purpuratus	E	XP_782444.2	ph7.7 1.7% dec over cont 7d; RT-PCR; larvae
1929		424	exotosin; nothing at 75%; Sp-Exostl (exostosin-like)	Mann et al. 2010	Strongylocentrotus	purpuratus	E	ref|XP_003725255.1|	LC-MS
24925		425	fertilization envelope component; nothing at 75%; Sp-Sfe1 (fertilization envelope component)	Mann et al. 2010	Strongylocentrotus	purpuratus	E	ref|NP_001164286.1|	LC-MS
fg9/16/20		426	fg9/16/20; nothing at 75%	Martin et al. 2011 J. Exp. Biol.	Paracentrotus	lividus	E	ABO65253.1	ph7.7 ~50% inc over ph8.1; RT-PCR; larvae; 52hr
fibronectin-like		427	fibronectin; nothing at 75%	Marie et al. 2011 J. Mol. Evol.	Mytilus	californianus	M	P86861]	TOF-MS/MS
EKC41461.1	427	427	Tyrosine-protein phosphatase Lar	Zhang et al. 2012	Crassostrea	gigas	M	EKC41461.1	LC-MS/MS
EKC41463.1	427	427	Tyrosine-protein phosphatase Lar	Zhang et al. 2012	Crassostrea	gigas	M	EKC41463.1	LC-MS/MS
EKC41462.1	427	427	Tyrosine-protein phosphatase Lar	Zhang et al. 2012	Crassostrea	gigas	M	EKC41462.1	LC-MS/MS
04758 1(a)		428	fibronectin; nothing at 75%; Sp-Fn3f_9; domains: hyalin and fibronectin	Mann et al. 2010	Strongylocentrotus	purpuratus	E	ref|XP_003729283.1|	LC-MS
2783		429	fibropellin; nothing at 75%; Sp-NotchL_1 (notch-like 1)/similar to fibropellin Ib; domains: MAM, EGF	Mann et al. 2010	Strongylocentrotus	purpuratus	E	ref|XP_782020.3	LC-MS
g8985		430	flagellar associated protein; nothing at 75%	Drake et al. 2013	Stylophora	pistillata	c	KC479171	LC-MS/MS
5999		431	fraser syndrome; nothing at 75%; Sp-Fras1/similar to Fraser syndrome 1	Mann et al. 2010	Strongylocentrotus	purpuratus	E	ref|XP_786570.3|	LC-MS
10644 1a,b		432	galactosyl transferase; nothing at 75%; Sp-B3galt1_9 (galactosyl transferase)	Mann et al. 2010	Strongylocentrotus	purpuratus	E	ref|XP_003728877.1|	LC-MS
16020 1(a)		433	glutamyl aminopeptidase; nothing at 75%; Sp-Enpep_2 (glutamyl aminopeptidase)	Mann et al. 2010	Strongylocentrotus	purpuratus	E	ref|XP_786118.2|	LC-MS
g12472		434	glyceraldehyde 3 phosphatase dehydrogenase; nothing at 75%	Drake et al. 2013	Stylophora	pistillata	c	KC149521	LC-MS/MS
lotgi1|2252542		434	GADPH	Mann et al. 2012	Lottia	gigantea	m	lotgi|222542	LC-MS/MS
27169 1a,b		435	hemicentin; Sp-Hmcn1L_4 (hemicentin-like)/similar to fibulin-6 (aa1-358); domain: IGcam	Mann et al. 2010	Strongylocentrotus	purpuratus	E	ref|XP_001198520.2|	LC-MS
23910		436	igg; nothing at 75%; Sp-Hypp_1098; domains: IG,IG_like	Mann et al. 2010	Strongylocentrotus	purpuratus	E	ref|XP_003724536.1|	LC-MS
11877		437	integrin; nothing at 75%; Sp-Ahi (integrin alpha subunit)	Mann et al. 2010	Strongylocentrotus	purpuratus	E	ref|XP_794080.3|	LC-MS
3504		438	jedi; nothing at 75%; Similar to Jedi protein; shares 1 peptide with Glean3:08666 (Sp-Pearl1L, platelet endothelial aggregation receptor 1-like)	Mann et al. 2010	Strongylocentrotus	purpuratus	E	ref|XP_789844.3|	LC-MS
g5540		439	kielin/chordin; nothing t 75%	Drake et al. 2013	Stylophora	pistillata	c	KC479170	LC-MS/MS
24995		440	kirrel; nothing at 75%; Sp-KirrelL (kin of IRRE_like); domains: IG	Mann et al. 2010	Strongylocentrotus	purpuratus	E	ref|XP_003723403.1|	LC-MS
21824		441	kringle; nothing at 75%; Hypothetical protein; domain: kringle	Mann et al. 2010	Strongylocentrotus	purpuratus	E	ref|XP_003723430.1|	LC-MS
laminin gamma		443	laminin; nothing at 75%	Hayward et al. 2011	Acropora	millepora	C	B17
g11651		444	late embryogenesis protein; nothing at 75%	Drake et al. 2013	Stylophora	pistillata	c	KC149519	LC-MS/MS
25246		445	lectin; nothing at 75%; Sp-Lman2/similar to vesicular mannose-binding lectin	Mann et al. 2010	Strongylocentrotus	purpuratus	E	ref|XP_783719.2	LC-MS
g9654		446	major yolk protein; nothing at 75%	Drake et al. 2013	Stylophora	pistillata	c	KC342192	LC-MS/MS
MPSP		447	mpsp; nothing at 75%	Lee et al. 2006 Protein Journal	Crassostrea	gigas	M		cDNA
MSUP-1		448	msup1; nothing at 75%	Marie et al. 2011 J. Mol. Evol.	Mytilus	edulis, galloprovincialis	M	P86853]	TOF-MS/MS
MSUP-2		449	msup2nothing at 75%	Marie et al. 2011 J. Mol. Evol.	Mytilus	californianus	M	P86858]	TOF-MS/MS
g11056		450	myosin regulatory; nothing at 75%	Drake et al. 2013	Stylophora	pistillata	c	KC000003	LC-MS/MS
N19 GenBank BAF76073.1 176 frame		451	n19; nothing at 75%;	Evans 2012 Bioinformatics			M		aragonite; Bioinformatics
Nacrein-like		452	nacrein; nothing at 75%	Marie et al. 2011 J. Mol. Evol.	Mytilus	californianus	M	P86856]	TOF-MS/MS
EKC34226.1	452	452	nacrein	Zhang et al. 2012	Crassostrea	gigas	M	EKC34226.1	LC-MS/MS
EKC41746.1	452	452	carbonic anhydrase 6	Zhang et al. 2012	Crassostrea	gigas	M	EKC41746.1	LC-MS/MS
6370		453	ncam140; nothing at 75%; Sp-Ncam/similar to Ncam-140	Mann et al. 2010	Strongylocentrotus	purpuratus	E	ref|XP_791295.3	LC-MS
19319		454	nerexophilin; nothing at 75%; Sp-Hypp_2431;domain: partial neurexophilin, IG	Mann et al. 2010	Strongylocentrotus	purpuratus	E	ref|XP_003723455.1|	LC-MS
Neuroglian-like		455	neuroglian; nothing at 75%	Ramos-Silva et al. 2013 Mar Biol Evol	Acropora	millepora	C	JR993827	LC-MS/MS
15902		456	neurotrimin; nothing at 75% Sp-Hypp_2238/similar to neurotrimin	Mann et al. 2010	Strongylocentrotus	purpuratus	E	ref|XP_800092.3|	LC-MS
4879		457	nothing at 7%; Sp-Fam55cL_2/similar to protein of unknown function, partial	Mann et al. 2010	Strongylocentrotus	purpuratus	E	ref|XP_003729195.1|	LC-MS
19369		458	nothing at 7%; Sp-Rndzvn (rendezvin); all peptides match to the C-terminus of this entry, which is not covered by SPU_019369; may not be part of rendezvin!	Mann et al. 2010	Strongylocentrotus	purpuratus	E	ref|XP_003731229.1|	LC-MS
ZP-EGF		459	nothing at 75%	Hayward et al. 2011	Acropora	millepora	C	A2
EGF-like domain		460	nothing at 75%	Hayward et al. 2011	Acropora	millepora	C	A32
vWA domain		461	nothing at 75%	Hayward et al. 2011	Acropora	millepora	C	A52
zonadhesin		462	nothing at 75%	Hayward et al. 2011	Acropora	millepora	C	A69
FRED domain		463	nothing at 75%	Hayward et al. 2011	Acropora	millepora	C	B84
Uncharacterized skeletal organic matrix protein-1 (USOMP-1)		464	nothing at 75%	Ramos-Silva et al. 2013 Mar Biol Evol	Acropora	millepora	C	JT021412	LC-MS/MS
Uncharacterized skeletal organic matrix protein-2 (USOMP-2)		465	nothing at 75%	Ramos-Silva et al. 2013 Mar Biol Evol	Acropora	millepora	C	JR982706	LC-MS/MS
Uncharacterized skeletal organic matrix protein-3 (USOMP-3)		466	nothing at 75%	Ramos-Silva et al. 2013 Mar Biol Evol	Acropora	millepora	C	JR997000	LC-MS/MS
Uncharacterized skeletal organic matrix protein-4 (USOMP-4)		467	nothing at 75%	Ramos-Silva et al. 2013 Mar Biol Evol	Acropora	millepora	C	JT004498	LC-MS/MS
Uncharacterized skeletal organic matrix protein-5 (USOMP-5)		468	nothing at 75%	Ramos-Silva et al. 2013 Mar Biol Evol	Acropora	millepora	C	JR973117 (JT018224) (JT001571)	LC-MS/MS
Uncharacterized skeletal organic matrix protein-6 (USOMP6)		469	nothing at 75%	Ramos-Silva et al. 2013 Mar Biol Evol	Acropora	millepora	C	JR971508	LC-MS/MS
Uncharacterized skeletal organic matrix protein-7 (USOMP7)		470	nothing at 75%	Ramos-Silva et al. 2013 Mar Biol Evol	Acropora	millepora	C	JR998260 (JT009312) (JT013858) (JT021838)	LC-MS/MS
ML5A7 [DW986289]		471	nothing at 75%	Marie et al. 2010 Prot Sci	Haliotis	asinina	M
P0012N13_463 [GT274423]		472	nothing at 75%	Marie et al. 2010 Prot Sci	Haliotis	asinina	M
EKC33725.1	472	472	collagen alpha 3vi	Zhang et al. 2012	Crassostrea	gigas	M	EKC33725.1	LC-MS/MS
lotgi1|123902	472	472	Kunitz-type protease inhibitor kalicludein-3/SHPI-1 and -2	Mann et al. 2012	Lottia	gigantea	M	lotgi1|123902	LC-MS/MS
P0006O07_675 [GT272916]		473	nothing at 75%	Marie et al. 2010 Prot Sci	Haliotis	asinina	M
ML3A11 [DW986237]		474	nothing at 75%	Marie et al. 2010 Prot Sci	Haliotis	asinina	M
ML6A10 [DW986342]		475	nothing at 75%	Marie et al. 2010 Prot Sci	Haliotis	asinina	M
ML8B1 [DW986463]		476	nothing at 75%	Marie et al. 2010 Prot Sci	Haliotis	asinina	M
lotgi1|234884	476	476	uncharacterized protein	Mann et al. 2012	Lottia	gigantea	M	lotgi1|234884	LC-MS/MS
P0011O14_517 [GT274178]		477	nothing at 75%	Marie et al. 2010 Prot Sci	Haliotis	asinina	M
ML5B8 [DW986296]		478	nothing at 75%	Marie et al. 2010 Prot Sci	Haliotis	asinina	M
ML5H8 [DW986339]		479	nothing at 75%	Marie et al. 2010 Prot Sci	Haliotis	asinina	M
ML6F9 [DW986386]		480	nothing at 75%	Marie et al. 2010 Prot Sci	Haliotis	asinina	M
5 kDa		481	nothing at 75%	Keith et al. 1993	Mytilus	edulis	M
EKC37151.1		481	phosphoglucomutase	Zhang et al. 2012	Crassostrea	gigas	M	EKC37151.1	LC-MS/MS
28.3 kDa		482	nothing at 75%	Hattan et al. 2001, Yin et al. 2005	Mytilus	edulis	M	AAQ63463.1
		483	nothing at 75%	Traylor-Knowles et al. 2009	Pocillopora	damicornis	C	bu_91849.1_c14721
		484	nothing at 75%	Traylor-Knowles et al. 2009	Pocillopora	damicornis	C	bu_91849.1_c14722
		485	nothing at 75%	Traylor-Knowles et al. 2009	Pocillopora	damicornis	C	bu_91849.1_c14723
		486	nothing at 75%	Traylor-Knowles et al. 2009	Pocillopora	damicornis	C	bu_91849.1_c14724
		487	nothing at 75%	Traylor-Knowles et al. 2009	Pocillopora	damicornis	C	bu_91849.1_c14725
		488	nothing at 75%	Traylor-Knowles et al. 2009	Pocillopora	damicornis	C	bu_91849.1_c14726
		489	nothing at 75%	Traylor-Knowles et al. 2009	Pocillopora	damicornis	C	bu_91849.1_c14727
		490	nothing at 75%	Traylor-Knowles et al. 2009	Pocillopora	damicornis	C	bu_91849.1_c14728
		491	nothing at 75%	Traylor-Knowles et al. 2009	Pocillopora	damicornis	C	bu_91849.1_c14729
		492	nothing at 75%	Traylor-Knowles et al. 2009	Pocillopora	damicornis	C	bu_91849.1_c14730
		493	nothing at 75%	Traylor-Knowles et al. 2009	Pocillopora	damicornis	C	bu_91849.1_c14731
		494	nothing at 75%	Traylor-Knowles et al. 2009	Pocillopora	damicornis	C	bu_91849.1_c14732
		495	nothing at 75%	Traylor-Knowles et al. 2009	Pocillopora	damicornis	C	bu_91849.1_c14733
		496	nothing at 75%	Traylor-Knowles et al. 2009	Pocillopora	damicornis	C	bu_91849.1_c14734
		497	nothing at 75%	Traylor-Knowles et al. 2009	Pocillopora	damicornis	C	bu_91849.1_c14735
		498	nothing at 75%	Traylor-Knowles et al. 2009	Pocillopora	damicornis	C	bu_91849.1_c14736
		499	nothing at 75%	Traylor-Knowles et al. 2009	Pocillopora	damicornis	C	bu_91849.1_c14737
		500	nothing at 75%	Traylor-Knowles et al. 2009	Pocillopora	damicornis	C	bu_91849.1_c14738
		501	nothing at 75%	Traylor-Knowles et al. 2009	Pocillopora	damicornis	C	bu_91849.1_c14739
g2385		502	nothing at 75%	Drake et al. 2013	Stylophora	pistillata	c	JX891654	LC-MS/MS
g11702		503	nothing at 75%	Drake et al. 2013	Stylophora	pistillata	c	KC342196	LC-MS/MS
g19762		504	nothing at 75%	Drake et al. 2013	Stylophora	pistillata	c	KC493649	LC-MS/MS
CARP2		505	nothing at 75%	Mass et al 2013 CB	Stylophora	pistillata	c	AGE35227.1
CARP1		506	nothing at 75%	Mass et al 2013 CB	Stylophora	pistillata	c	AGE35225.2
47kDa		507	nothing at 75%;	Puverel et al. 2005 Comp. Biochem. Physiol. B.	Pavona	cactus	C	Nterm	N-terminal; AGAYLDLSMK DFTFSQVNK PEETFAVVALSIK MTFDKPGGLVTGTLINT
70 kDa		508	nothing at 75%;	Rahman et al. 2005 Proteomics	Sinularia	polydactyla	C	Nterm	N-terminal; QTNNMMEELDRVSEDVTF
63KDA		509	nothing at 75%;	Rahman et al. 2005 Proteomics	Sinularia	polydactyla	C	Nterm	N-terminal; RGIVPEVGGEPLAGDPQN
GLEAN3_08678		510	nothing at 75%;	Mann et al. 2010 Proteome Sci	Strongylocentrotus	purpuratus	E	ref|XP_787505.3|	test, LC-MS; MEKVALSPTDTSM LSPTDTSMLSSIN TDTSMLSSINQRQ DTSMLSSINQRQF KVALSPTDTSMLS
GLEAN3_15408		511	nothing at 75%;	Mann et al. 2010 Proteome Sci	Strongylocentrotus	purpuratus	E	ref|XP_003730277.1|	test, LC-MS; AESSGVSPTNSVG SSGVSPTNSVGDV
GLEAN3_16285;16293		512	nothing at 75%;	Mann et al. 2010 Proteome Sci	Strongylocentrotus	purpuratus	E	ref|XP_001199595.2|	test, LC-MS; RFNASGSPVGSPQ SGSPVGSPQLERH
GLEAN3_16285		513	nothing at 75%;	Mann et al. 2010 Proteome Sci	Strongylocentrotus	purpuratus	E	ref|XP_003726830.1|	test, LC-MS; ESKPLLSDGEEVE RPISRRSAALSDD RRSAALSDDDDQS
GLEAN3_18649		514	nothing at 75%;	Mann et al. 2010 Proteome Sci	Strongylocentrotus	purpuratus	E	ref|XP_783303.3|	test, LC-MS; APLDQDSDDDDDD
GLEAN3_11703;21739		515	nothing at 75%;	Mann et al. 2010 Proteome Sci	Strongylocentrotus	purpuratus	E	ref|XP_794024.2|	test, LC-MS; AAKKEESEEESDD EESEEESDDDMGF
lotgi1|237709	515	515	acidic ribosomal protein P0	Mann et al. 2012	Lottia	gigantea	M	lotgi1|237709	LC-MS/MS
lotgi1|121932	515	515	ribosomal protein P2	Mann et al. 2012	Lottia	gigantea	M	lotgi1|121932	LC-MS/MS
GLEAN3_20613		516	nothing at 75%;	Mann et al. 2010 Proteome Sci	Strongylocentrotus	purpuratus	E	ref|XP_799949.3|	test, LC-MS; SFKAQDSISSITK AQDSISSITKEIY
lotgi1_203845		516	dynein light chain I	Mann et al. 2012	Lottia	gigantea	M	lotgi1|203845	LC-MS/MS
GLEAN3_11684;27937	516	516	nothing at 75%;	Mann et al. 2010 Proteome Sci	Strongylocentrotus	purpuratus	E	ref|XP_795406.2|	test, LC-MS; EKDIASYIKKDFD
GLEAN3_18389		518	nothing at 75%;	Mann et al. 2010 Proteome Sci	Strongylocentrotus	purpuratus	E	ref|XP_003724403.1|	test, LC-MS; VITEELSDPESPR
GLEAN3_02353		519	nothing at 75%;	Mann et al. 2010 Proteome Sci	Strongylocentrotus	purpuratus	E	ref|XP_003723916.1|	teeth; LC-MS; QIKDGLSAGLPAL
lotgi1|121860	519	519	nucleobindin-2	Mann et al. 2012	Lottia	gigantea	M	lotgi1|121860	LC-MS/MS
GLEAN3_03345		520	nothing at 75%;	Mann et al. 2010 Proteome Sci	Strongylocentrotus	purpuratus	E	ref|NP_001091929.1|	teeth; LC-MS; DLLGYLSAESGEK GYLSAESGEKLFD
GLEAN3_13763		521	nothing at 75%;	Mann et al. 2010 Proteome Sci	Strongylocentrotus	purpuratus	E	ref|XP_791445.3|	teeth; LC-MS; AMQPYGSDLDDDD
lotgi1|156599	521	521	FAM20C/DMP4 (dentin matrix protein 4)	Mann et al. 2012	Lottia	gigantea	M	lotgi1|156599	LC-MS/MS
GLEAN3_14308		522	nothing at 75%;	Mann et al. 2010 Proteome Sci	Strongylocentrotus	purpuratus	E	ref|XP_001178487.2|	teeth; LC-MS; KVVILDSLEDFDT
GLEAN3_14805		523	nothing at 75%;	Mann et al. 2010 Proteome Sci	Strongylocentrotus	purpuratus	E	ref|XP_001194225.2|	teeth; LC-MS; PPEKDMSVNQIAD
GLEAN3_10288		524	nothing at 75%;	Mann et al. 2010 Proteome Sci	Strongylocentrotus	purpuratus	E	ref|XP_003723904.1|	teeth; LC-MS; RVLGTGTLDRQTR
GLEAN3_00513		525	nothing at 75%; dual oxidase 1 precursor	Mann et al. 2008b Proteome Sci	Strongylocentrotus	purpuratus	E	ref|NP_001118237.1	LC-MS; DLMALNIQR EDNIITEDLQR VETVQQEEAK VFGPLEFSR VGLLVSPDGK
lotgi1|99809	525	525	uncharacterized protein	Mann et al. 2012	Lottia	gigas	M	lotgi1|99809	LC-MS/MS
GLEAN3_05872		526	nothing at 75%;	Mann et al. 2008b Proteome Sci	Strongylocentrotus	purpuratus	E	ref|XP_003726459.1	LC-MS; ILEVAPAPVSK
GLEAN3_11588		527	nothing at 75%;	Mann et al. 2008b Proteome Sci	Strongylocentrotus	purpuratus	E	ref|XP_787359.3	LC-MS;
GLEAN3_14564		528	nothing at 75%;	Mann et al. 2008b Proteome Sci	Strongylocentrotus	purpuratus	E	ref|XP_003726858.1	LC-MS;
lotgi1|214616		528	MEC2	Mann et al. 2012	Lottia	gigantea	M	lotgi1|214616	LC-MS/MS
GLEAN3_14715		529	nothing at 75%; gelsolin	Mann et al. 2008b Proteome Sci	Strongylocentrotus	purpuratus	E	ref|XP_792912.2	LC-MS;
lotgi1|214936	529	529	gelsolin	Mann et al. 2012	Lottia	gigantea	M	lotgi1|214936	LC-MS/MS
lotgi1|192582	529	529	gelsolin	Mann et al. 2012	Lottia	gigantea	M	lotgi1|192582	LC-MS/MS
lotgi1|105757	529	529	gelsolin	Mann et al. 2012	Lottia	gigantea	M	lotgi1|105757	LC-MS/MS
lotgi1|144968	529	529	gelsolin/yillin	Mann et al. 2012	Lottia	gigantea	M	lotgi1|144968	LC-MS/MS
GLEAN3_19691		530	nothing at 75%;	Mann et al. 2008b Proteome Sci	Strongylocentrotus	purpuratus	E	ref|XP_791741.2|	LC-MS;
GLEAN3_22561		531	nothing at 75%;	Mann et al. 2008b Proteome Sci	Strongylocentrotus	purpuratus	E	ref|XP_003725711.1|	LC-MS;
GLEAN3_24352		532	nothing at 75%;	Mann et al. 2008b Proteome Sci	Strongylocentrotus	purpuratus	E	ref|XP_788127.3|	LC-MS;
GLEAN3_26000		533	nothing at 75%;	Mann et al. 2008b Proteome Sci	Strongylocentrotus	purpuratus	E	ref|XP_785821.2|	LC-MS;
GLEAN3_27145		534	nothing at 75%;	Mann et al. 2008b Proteome Sci	Strongylocentrotus	purpuratus	E	ref|XP_001199672.2|	LC-MS;
GLEAN3_27236		535	nothing at 75%;	Mann et al. 2008b Proteome Sci	Strongylocentrotus	purpuratus	E	ref|XP_780266.1|	LC-MS;
lotgi1|168464		535	voltage-dependent anion channel 2-like protein	Mann et al. 2012	Lottia	gigantea	M	lotgi1|168464	LC-MS/MS
GLEAN3_27372		536	nothing at 75%;	Mann et al. 2008b Proteome Sci	Strongylocentrotus	purpuratus	E	ref|NP_999764.1|	LC-MS;
GLEAN3_28135		537	nothing at 75%;	Mann et al. 2008b Proteome Sci	Strongylocentrotus	purpuratus	E	ref|NP_999722.1|	LC-MS;
EKC25595.1	537	537	antigen ki-67	Zhang et al. 2012	Crassostrea	gigas	M	EKC25595.1	LC-MS/MS
GLEAN3_00379		538	nothing at 75%;	Mann et al. 2008b Proteome Sci	Strongylocentrotus	purpuratus	E	ref|XP_792948.2|	LC-MS;
GLEAN3_05014		539	nothing at 75%;	Mann et al. 2008b Proteome Sci	Strongylocentrotus	purpuratus	E	ref|XP_003729128.1|	LC-MS;
GLEAN3_10169		540	nothing at 75%;	Mann et al. 2008b Proteome Sci	Strongylocentrotus	purpuratus	E	ref|XP_003727740.1|	LC-MS;
GLEAN3_24103		541	nothing at 75%;	Mann et al. 2008b Proteome Sci	Strongylocentrotus	purpuratus	E	ref|XP_795205.2|	LC-MS;
GLEAN3_26000		542	nothing at 75%;	Mann et al. 2008b Proteome Sci	Strongylocentrotus	purpuratus	E	ref|XP_780611.2|	LC-MS;
GLEAN3_26997		543	nothing at 75%;	Mann et al. 2008b Proteome Sci	Strongylocentrotus	purpuratus	E	ref|XP_001183642.2|	LC-MS;
GLEAN3_28450		544	nothing at 75%;	Mann et al. 2008b Proteome Sci	Strongylocentrotus	purpuratus	E	ref|XP_003727743.1|	LC-MS;
Contig_90c_665_4		545	nothing at 75%; 67kD laminin receptor precursor	Joubert et al. 2010	Pinctada	margaritifera	M	not publically available
lotgi|203487		545	ribosomal protein SA	Mann et al. 2012	Lottia	gigantea	M	lotgi1|203487	LC-MS/MS
Contig_90c_20552_5		546	nothing at 75%; bone morphogenic protein type 2 receptor	Joubert et al. 2010	Pinctada	margaritifera	M
Contig_90c_2165_6		547	nothing at 75%; calcium-ATPase	Joubert et al. 2010	Pinctada	margaritifera	M
Contig_90c_666_1		548	nothing at 75%; calcium/calmodulin-dependent serine protein kinase 1	Joubert et al. 2010	Pinctada	margaritifera	M
Contig_90c_501_4		549	nothing at 75%; calreticulin	Joubert et al. 2010	Pinctada	margaritifera	M	not publically available
lotgi1|206609		549	calreticulin	Mann et al. 2012	Lottia	gigantea	M	lotgi1|206609	LC-MS/MS
Contig_90c_299_1		550	nothing at 75%; Carbonic anhydrase precursor	Joubert et al. 2010	Pinctada	margaritifera	M
SEC13-like		551	nothing at 75%; cartilage development	Kaniewska et al. 2012	Acropora	millepora	C	D039-F9; GO003282.1
Contig_90c_615_2		552	nothing at 75%; Chitin synthase / PfCHS1	Joubert et al. 2010	Pinctada	margaritifera	M	not publically available
Cluster000096		553	nothing at 75%; ECR	Moya et al. 2012	Acropora	millepora	C	JR977044.1
Cluster004352		554	nothing at 75%; ECR	Moya et al. 2012	Acropora	millepora	C	JR985703
Cluster020895		555	nothing at 75%; ECR	Moya et al. 2012	Acropora	millepora	C	JT020072
Cluster021686		556	nothing at 75%; ECR	Moya et al. 2012	Acropora	millepora	C	JR973524
Cluster001749		557	nothing at 75%; ECR	Moya et al. 2012	Acropora	millepora	C	JR978351
Cluster011145		558	nothing at 75%; ECR	Moya et al. 2012	Acropora	millepora	C	JT023369
Cluster000480		559	nothing at 75%; ECR	Moya et al. 2012	Acropora	millepora	C	JR999776
Cluster025936		560	nothing at 75%; ECR	Moya et al. 2012	Acropora	millepora	C	JT010482
Cluster002476p		561	nothing at 75%; ECR	Moya et al. 2012	Acropora	millepora	C	JT011283
lotgi1|102397	561	561	pancreatic lipase-related protein	Mann et al. 2012	Lottia	gigantea	M	lotgi1|102397	LC-MS/MS
lotgi1|109426	561	561	pancreatic lipase-related protein	Mann et al. 2012	Lottia	gigantea	M	lotgi1|109426	LC-MS/MS
lotgi1|98300	561	561	pancreatic lipase-related	Mann et al. 2012	Lottia	gigantea	M	lotgi1|98300	LC-MS/MS
lotgi1|98299	561	561	pancreatic lipase-related	Mann et al. 2012	Lottia	gigantea	M	lotgi1|98299	LC-MS/MS
Cluster036115		562	nothing at 75%; ECR	Moya et al. 2012	Acropora	millepora	C	JT004372
Cluster031871		563	nothing at 75%; ECR	Moya et al. 2012	Acropora	millepora	C	JR989747
Cluster009706		564	nothing at 75%; ECR	Moya et al. 2012	Acropora	millepora	C	JR990413
Cluster010615		565	nothing at 75%; ECR	Moya et al. 2012	Acropora	millepora	C	JT004425
Cluster017113		566	nothing at 75%; ECR	Moya et al. 2012	Acropora	millepora	C	JR995348
Cluster028720		567	nothing at 75%; ECR	Moya et al. 2012	Acropora	millepora	C	JR998422.1
Cluster030669		568	nothing at 75%; ECR	Moya et al. 2012	Acropora	millepora	C	JT003666
Cluster013285		569	nothing at 75%; ECR	Moya et al. 2012	Acropora	millepora	C	JR995087
Cluster000424		570	nothing at 75%; ECR	Moya et al. 2012	Acropora	millepora	C	JR999130
Cluster010541		571	nothing at 75%; ECR	Moya et al. 2012	Acropora	millepora	C	JR974070
Cluster012228		572	nothing at 75%; ECR	Moya et al. 2012	Acropora	millepora	C	JR999732
Cluster000024		573	nothing at 75%; ECR	Moya et al. 2012	Acropora	millepora	C	JR980984
EKC33039.1	573	573	usherin	Zhang et al. 2012	Crassostrea	gigas	M	EKC33039.1	LC-MS/MS
Cluster004430		574	nothing at 75%; ECR	Moya et al. 2012	Acropora	millepora	C	JR973702
Cluster016623		575	nothing at 75%; ECR	Moya et al. 2012	Acropora	millepora	C	JR998591.1
Cluster017471		576	nothing at 75%; ECR	Moya et al. 2012	Acropora	millepora	C	JT023241.1
Cluster023023		577	nothing at 75%; ECR	Moya et al. 2012	Acropora	millepora	C	JT016689.1
Cluster025857		578	nothing at 75%; ECR	Moya et al. 2012	Acropora	millepora	C	JT002715.1
Cluster030604		579	nothing at 75%; ECR	Moya et al. 2012	Acropora	millepora	C	JR980703.1
EKC38805.1	579	579	chitotriosidase-1	Zhang et al. 2012	Crassostrea	gigas	M	EKC38805.1	LC-MS/MS
Cluster033777		580	nothing at 75%; ECR	Moya et al. 2012	Acropora	millepora	C	JR984369.1
Cluster051953		581	nothing at 75%; ECR	Moya et al. 2012	Acropora	millepora	C	JT013276.1
Contig_90c_1569_6		582	nothing at 75%; engrailed	Joubert et al. 2010	Pinctada	margaritifera	M
Contig_90c_7875_3		583	nothing at 75%; EP protein precursor	Joubert et al. 2010	Pinctada	margaritifera	M
Contig_90c_5412_4		584	nothing at 75%; G-protein a-subunit s class	Joubert et al. 2010	Pinctada	margaritifera	M
lotgi1|226384		584	guanine nucleotide-binding protein Gi α	Mann et al. 2012	Lottia	gigantea	M	lotgi1|226384	LC-MS/MS
lotgi1|163596	584	584	guanine nucleotide-binding protein Gi α	Mann et al. 2012	Lottia	gigantea	M	lotgi1|163596	LC-MS/MS
lotgi1|194019	584	584	guanine nucleotide-binding protein Gi α	Mann et al. 2012	Lottia	gigantea	M	lotgi1|194019	LC-MS/MS
Contig_90c_5271_4		585	nothing at 75%; homeobox protein 4	Joubert et al. 2010	Pinctada	margaritifera	M
27172 1a,b		586	nothing at 75%; Hypothetical protein; domain: alpha/beta hydrolase	Mann et al. 2010	Strongylocentrotus	purpuratus	E	ref|XP_790571.2|	LC-MS
22576		587	nothing at 75%; Hypothetical protein; domains: Sod_Cu, DEATH	Mann et al. 2010	Strongylocentrotus	purpuratus	E	ref|XP_787771.3|	LC-MS
3555		588	nothing at 75%; Hypothetical protein/similar to SH2/SH3 adapter Grb3; domains: SH2,SH3	Mann et al. 2010	Strongylocentrotus	purpuratus	E	ref|XP_786023.2|	LC-MS
lotgi1|196407	588	588	uncharacterized protein	Mann et al. 2012	Lottia	gigantea	M	lotgi1|196407
Contig_90c_2046_6		589	nothing at 75%; Incilarin A	Joubert et al. 2010	Pinctada	margaritifera	M
Contig_90c_8263_6		590	nothing at 75%; Jacalin-related lectin PPL2-a	Joubert et al. 2010	Pinctada	margaritifera	M
IMSP-6		591	nothing at 75%; Kazal-like	Marie et al. 2011 Mar Biotechnol	Venerupis	philippinarum	M	AM876906; SPTPVVYR	MS/MS
Contig_90c_22546_2		592	nothing at 75%; L-type voltage-dependent calcium channel beta subunit	Joubert et al. 2010	Pinctada	margaritifera	M
207877_3232_2965_5		593	nothing at 75%; lectin	Joubert et al. 2010	Pinctada	margaritifera	M
Contig_90c_7122_3		594	nothing at 75%; metallothionein mRNA	Joubert et al. 2010	Pinctada	margaritifera	M
no name1		595	nothing at 75%; no homologues	Kaniewska et al. 2012	Acropora	millepora	C	A036-B3; DY578402.1
IMSP-1		596	nothing at 75%; novel	Marie et al. 2011 Mar Biotechnol	Venerupis	philippinarum	M	AM851246; AM875557; LESILLR RLESILLR GPYSDFVGWLGVGPR FQPENWNIDPIQR	MS/MS
IMSP-3		597	nothing at 75%; novel	Marie et al. 2011 Mar Biotechnol	Venerupis	philippinarum	M	AM872695; DVEPIMR ANALLWGQR NLGIHYIFTSK	MS/MS
141091_3618_1772_3		598	nothing at 75%; Perlucin-7	Joubert et al. 2010	Pinctada	margaritifera	M
no name3		599	nothing at 75%; peroxidase-like	Kaniewska et al. 2012	Acropora	millepora	C	D022-H10; GO001722.1
Contig_90c_305_4		600	nothing at 75%; pfGbeta1	Joubert et al. 2010	Pinctada	margaritifera	M	not publically available
lotgi1|236462		600	nucleotide binding protein	Mann et al. 2012	Lottia	gigantea	M	lotgi1|236462	LC-MS/MS
393137_2638_0208_3		601	nothing at 75%; Plasma membrane calcium ATPase	Joubert et al. 2010	Pinctada	margaritifera	M
no name2		602	nothing at 75%; poor blast hits	Kaniewska et al. 2012	Acropora	millepora	C	A049-H7; DY579133.1
Contig_90c_928_2		603	nothing at 75%; Putative uncharacterized protein F18	Joubert et al. 2010	Pinctada	margaritifera	M
Contig_90c_3516_1		604	nothing at 75%; sarcoplasmic calcium-binding protein	Joubert et al. 2010	Pinctada	margaritifera	M
8329		605	nothing at 75%; Similar to KIAA0789 protein; domain: partial sulfotransferase_1	Mann et al. 2010	Strongylocentrotus	purpuratus	E	ref|XP_780707.2|	LC-MS
12356		606	nothing at 75%; Sp-C1orf58/hypothetical protein; domain: BRO1	Mann et al. 2010	Strongylocentrotus	purpuratus	E	ref|XP_784283.3|	LC-MS
24653		607	nothing at 75%; Sp-C1qL_4 (complement C1q-like)	Mann et al. 2010	Strongylocentrotus	purpuratus	E	ref|XP_780567.1	LC-MS
8101		608	nothing at 75%; Sp-Fam78a (similar to Family with sequence similarity 78, member A)		Strongylocentrotus	purpuratus	E	ref|XP_797512.2|	LC-MS
18964 1a,b		609	nothing at 75%; Sp-Fk506bp2/similar to MGC53657	Mann et al. 2010	Strongylocentrotus	purpuratus	E	ref|XP_785999.1|	LC-MS
lotgi1|192237		609	peptidylprolyl isomerase/FKBP2	Mann et al. 2012	Lottia	gigantea	M	lotgi1|192237	LC-MS/MS
lotgi1|238515	609	609	FKBP-type peptidyl-prolyl cis/trans isomerase	Mann et al. 2012	Lottia	gigantea	M	lotgi1|238515	LC-MS/MS
03084 1(a),(b)		610	nothing at 75%; Sp-Gpc1246_1/glypican-6; GPI?	Mann et al. 2010	Strongylocentrotus	purpuratus	E	ref|XP_001178484.2|	LC-MS
12486 1a,b		611	nothing at 75%; Sp-Hypp_1035/similar to MEGF11 protein; domain: EMI (Cys-rich domain of EMILINS)	Mann et al. 2010	Strongylocentrotus	purpuratus	E	ref|XP_001185757.1|	LC-MS
7451		612	nothing at 75%; Sp-Hypp_1723; domains:Cys-rich secretory protein, EGF	Mann et al. 2010	Strongylocentrotus	purpuratus	E	ref|XP_003724791.1	LC-MS
EKC30911.1		612	glioma pathogenesis-related protein 1	Zhang et al. 2012	Crassostrea	gigas	M	EKC30911.1	LC-MS/MS
lotgi1|116834		612	uncharacterized protein	Mann et al. 2012	Lottia	gigantea	M	lotgi1|116834	LC-MS/MS
23288		613	nothing at 75%; Sp-Hypp_2210; shares 1 peptide with Glean3:21860; domains:CCP/Sushi	Mann et al. 2010	Strongylocentrotus	purpuratus	E	ref|XP_001175735.1|	LC-MS
26140		614	nothing at 75%; Sp-Hypp_2821; domain: SBP_bac_3 (bacterial periplasmic transporter)	Mann et al. 2010	Strongylocentrotus	purpuratus	E	ref|XP_001196747.2	LC-MS
26703		615	nothing at 75%; Sp-Hypp_2862; domains: IG	Mann et al. 2010	Strongylocentrotus	purpuratus	E	ref|XP_003731632.1|	LC-MS
752		616	nothing at 75%; Sp-Hypp_313 (hypothetical protein 313); 12% Ser	Mann et al. 2010	Strongylocentrotus	purpuratus	E	ref|XP_003728419.1|	LC-MS
19034 1a		617	nothing at 75%; Sp-Hypp_925; domain: IG	Mann et al. 2010	Strongylocentrotus	purpuratus	E	ref|XP_003724227.1|	LC-MS
25915		618	nothing at 75%; Sp-Kiaa0174L; domain: DUF292; 15% Pro; N-term: Acetyl-Met1	Mann et al. 2010	Strongylocentrotus	purpuratus	E	XP_786445.1	LC-MS
6145		619	nothing at 75%; Sp-Kiaa1324L/hypothetical protein; domains: mannose 6-phosphate receptor, growth factor receptor, TNF receptor-like	Mann et al. 2010	Strongylocentrotus	purpuratus	E	ref|XP_003728718.1|	LC-MS
01129 1b		620	nothing at 75%; Sp-Lrr/Igr_10	Mann et al. 2010	Strongylocentrotus	purpuratus	E	ref|XP_001199084.2|	LC-MS
20031 1a		621	nothing at 75%; Sp-Pam/similar to peptidyl-glycine alpha-amidating monooxygenase-B	Mann et al. 2010	Strongylocentrotus	purpuratus	E	ref|XP_784943.3|	LC-MS
lotgi1|204047	621	621	peptidyl-glycine α-amidating monooxygenase	Mann et al. 2012	Lottia	gigantea	M	lotgi1|204047	LC-MS/MS
310		622	nothing at 75%; Sp-pdgfr/vegfrL/similar to Fit-1 tyrosine kinase and P. lividus VEGF receptor	Mann et al. 2010	Strongylocentrotus	purpuratus	E	ref|XP_785024.3|	LC-MS
26982		623	nothing at 75%; Sp-SerinC1; potential transmembrane regions excluded from calculations; peptides from extracellular loops	Mann et al. 2010	Strongylocentrotus	purpuratus	E	ref|XP_001190705.2	LC-MS
5193		624	nothing at 75%; Sp-Tcp2/similar to C3 and PZP-like, alpha-2-macroglobulin domain containing 8		Strongylocentrotus	purpuratus	E	ref|XP_785018.3|	LC-MS
8857		625	nothing at 75%; Sp-Timp3b (tissue inhibitor of metalloproteases)	Mann et al. 2010	Strongylocentrotus	purpuratus	E	ref|XP_003725523.1	LC-MS
11963		626	nothing at 75%; Sp-Tsg101 (tumor susceptibility gene 101); domains: UBCc (ubiquitin-conjugating E2)	Mann et al. 2010	Strongylocentrotus	purpuratus	E	ref|XP_003729627.1|	LC-MS
7355		627	nothing at 75%; Sp-Unk_38; domain: ZnMc-adamalysin_II_like	Mann et al. 2010	Strongylocentrotus	purpuratus	E	ref|XP_003728569.1|	LC-MS
10203		628	nothing at 75%; Sp-Yp30l/similar to HLC-32/yolk granule protein YP30	Mann et al. 2010	Strongylocentrotus	purpuratus	E	ref|XP_797409.2|	LC-MS
Spermatogenesis-associated protein 6		629	nothing at 75%; spermatogenesis protein	Kaniewska et al. 2012	Acropora	millepora	C	B016-B3; DY582912.1
129509_3511_1612_1		630	nothing at 75%; TFG beta signaling pathway factor	Joubert et al. 2010	Pinctada	margaritifera	M
Contig_90c_4783_1		631	nothing at 75%; Veliger mantle 1	Joubert et al. 2010	Pinctada	margaritifera	M
Contig_90c_22805_2		632	nothing at 75%; voltage-dependent L-type calcium channel alpha-1 subunit isoform c	Joubert et al. 2010	Pinctada	margaritifera	M
24042		633	nothing at 755; Similar to heparan sulfate D-glucosaminyl 3-O-sulfotransferase-2	Mann et al. 2010	Strongylocentrotus	purpuratus	E	ref|XP_003724548.1|	LC-MS
osteonectin SPU_028275 –1.61r 1.00 Glycoprotein that binds calcium		634	osteonectin; nothing at 75%	Todgham & Hofmann 2009 J. exp. Biol..	Strongylocentrotus	purpuratus	E		values are upper and lower limit of fold change for 540ppm versus 380ppm; microarray analysis; larvae; 40hr
lotgi1|109908	634	634	osteonectin/BM-40/SPARC	Mann et al. 2012	Lottia	gigantea	M	lotgi1|109908	LC-MS/MS
28184		635	osteonectin; nothing at 75%; Sp-SmocL (osteonectin/SPARC family)	Mann et al. 2010	Strongylocentrotus	purpuratus	E	ref|XP_793433.3|	LC-MS
P16-like SPU_018405 –1.60 r +1.03 PMC-specific protein essential for skeletal rod elongation		636	p16; nothing at 75%	Todgham & Hofmann 2009 J. exp. Biol..	Strongylocentrotus	purpuratus	E		values are upper and lower limit of fold change for 540ppm versus 380ppm; microarray analysis; larvae; 40hr
p20		637	p20; nothing at 75%	Bedouet et al. 2001	Pinctada	maxima	m	N-terminal; P0CAY9.1	YQRXSRYYYYXGPPDDXDDR
par6		638	par6; nothing at 75%;	Shiomi et al. 2012 Dev Genes Evol	Hemicentrotus	pulcherrimus	E	BAF99001.1	cloning, injection, ISH, antibodies, immuno
Perlustrin Swiss-Prot P82595.2 84 intra		639	perlustrin; nothing at 75%	Evans 2012 Bioinformatics			M		Bioinformatics
perlwapin-like		640	perlwapin; nothing at 75%	Marie et al. 2011 J. Mol. Evol.	Mytilus	galloprovincialis	M	P86855]	TOF-MS/MS
PFMG11 GenBank AZZ22320.1 174 pearl		641	pfmg	Evans 2012 Bioinformatics			M		Bioinformatics
PFMG5 GenBank AZZ76259.1 87 pearl		642	pfmg5	Evans 2012 Bioinformatics			M		Bioinformatics
11256 1(b)		643	phospholipase; nothing at 75%; Similar to phospholipase A2	Mann et al. 2010	Strongylocentrotus	purpuratus	E	ref|XP_003729200.1|	LC-MS
4859		644	pleckstrin; nothing at 75%; Sp-Plekhb2 (pleckstrin homology domain-containing, family B, member 2)	Mann et al. 2010	Strongylocentrotus	purpuratus	E	ref|XP_797068.2|	LC-MS
16397		645	pleiotrophin; nothing at 75%; Sp-Hypp_2259/similar to pleiotrophin	Mann et al. 2010	Strongylocentrotus	purpuratus	E	ref|XP_780885.1|	LC-MS
polycystic kidney disease 1-related skeletal organic matrix protein (PKD1-related protein)		646	polycystic kidney disease; nothing at 75%	Ramos-Silva et al. 2013 Mar Biol Evol	Acropora	millepora	C	JR991141 (JR978931) (JR991355)	LC-MS/MS
20140		647	programmed cell death; nothing at 755; Sp-pdcd6ip (programmed cell death 6 interacting); shares 1 peptide with Glean3:09210 (Sp-Pdcd6ip_2)	Mann et al. 2010	Strongylocentrotus	purpuratus	E	ref|XP_784906.2|	LC-MS
13662		648	ribosomal protein; nothing at 75%; Sp-Rps3/similar to ribosomal protein S3	Mann et al. 2010	Strongylocentrotus	purpuratus	E	ref|XP_798304.1|	LC-MS
lotgi1|223917		648	ribosomal protein S3	Mann et al. 2012	Lottia	gigantea	M	lotgi1|223917	LC-MS/MS
25574		649	ribosomal; nothing at 75%; Sp-Rps14 (ribosomal protein S14)	Mann et al. 2010	Strongylocentrotus	purpuratus	E	ref|NP_001229580.1|	LC-MS
lotgi1|209986		649	ribosomal protein s14	Mann et al. 2012	Lottia	gigantea	M	lotgi1|209986	LC-MS/MS
Runt-1 SPU_025612 –1.66 r +1.01 Transcription factor, triggers differentiation of skeletogenic cells		650	runt; nothing at 75%	Todgham & Hofmann 2009 J. exp. Biol..	Strongylocentrotus	purpuratus	E		values are upper and lower limit of fold change for 540ppm versus 380ppm; microarray analysis; larvae; 40hr
Cluster020021		651	same as cluster017113; ECR	Moya et al. 2012	Acropora	millepora	C	JR995348
Secreted acidic protein 1 (Amil-SAP1)		652	sap; nothing at 75%;	Ramos-Silva et al. 2013 Mar Biol Evol	Acropora	millepora	C	JT006291	LC-MS/MS
Secreted acidic protein 1 (Amil-SAP1)		653	sap; nothing at 75%;	Ramos-Silva et al. 2013 Mar Biol Evol	Acropora	millepora	C	JT018094	LC-MS/MS
17083		654	scramblase; nothing at 75%; Sp-Plscr3 (scramblase); shares 1 peptide with Glean3:09119 (Sp-Pppl_252; pol polyprotein-like_252) and Glean3:24989 (Sp-Rdh8_9; retinol dehydrogenase)	Mann et al. 2010	Strongylocentrotus	purpuratus	E	XP_003729206.1	LC-MS
18516		660	serine protease; nothing at 75%; Sp-Prss12L_2 (serine protease 12-like)/similar to SRCR domain protein, membrane form 2; domains:SRCR, WSC, CCP	Mann et al. 2010	Strongylocentrotus	purpuratus	E	ref|XP_001196501.2|	LC-MS
11588 1a,(b),d		661	solute carrier family; nothing at 75%; Sp-Spc39L (solute carrier family 39)/similar to 2α fibrillar collagen; domains: KAZAL, Zip;	Mann et al. 2010	Strongylocentrotus	purpuratus	E	ref|XP_787454.3|	LC-MS
3402		662	syndecan; nothing at 75%; Sp-Sdc (syndecan)	Mann et al. 2010	Strongylocentrotus	purpuratus	E	ref|NP_001118233.1	LC-MS
884		663	tetraspanin; nothing at 75%; Sp-Ttrspn (tetraspanin); emPAI and coverage calculated for extracellular domain	Mann et al. 2010	Strongylocentrotus	purpuratus	E	ref|XP_003723816.1|	LC-MS
13077 1a,b		664	thrombospondin; nothing at 75%; Sp-Hypp_87/similar to TFP250/thrombospondin; domains: CCP, EGF; shares 1 peptide with Glean3:16774 (Sp-Hypp3379)	Mann et al. 2010	Strongylocentrotus	purpuratus	E	ref|XP_786756.3|	LC-MS
23083		665	translation initiation factor; nothing at 75%; Sp-Eif4A (translation initiation factor 4A)	Mann et al. 2010	Strongylocentrotus	purpuratus	E	ref|XP_785431.3|	LC-MS
lotgi1|207101		665	translation initiation factor elF4	Mann et al. 2012	Lottia	galloprovincialis	M	lotgi1|207101	LC-MS/MS
EKC17230.1		665	initiation factor 4A-II	Zhang et al. 2012	Crassostrea	gigas	M	EKC17230.1	LC-MS/MS
20931		666	transmembrane superfamily; nothing at 75%; Sp-Tm9sf2 (transmembrane 9 superfamily member 2); shares 2 peptides with Glean3:20427 (Sp-Tm9sf2_2) and 1 peptide with Glean3:10157 (Sp-Tm9sf2_1)	Mann et al. 2010	Strongylocentrotus	purpuratus	E	XP_793969.3	LC-MS
49		667	trypsin; nothing at 75%; Sp_TrypL (trypsin-like serine protease with CCP repeats)/similar to complement component 2, factor B	Mann et al. 2010	Strongylocentrotus	purpuratus	E	ref|XP_785372.3	LC-MS
13857		668	vacular protein sorting; nothing at 75%; Sp-Vps28/similar to vacuolar protein sorting 28	Mann et al. 2010	Strongylocentrotus	purpuratus	E	ref|XP_786883.1|	LC-MS
19426		669	vaculor protein sorting factor; nothing at 75%; Sp-Vps4B (vacuolar protein sorting factor 4B)/similar to MGC139102 protein	Mann et al. 2010	Strongylocentrotus	purpuratus	E	ref|XP_784952.2|	LC-MS
g9861		670	viral inclusion protein; nothing at 75%	Drake et al. 2013	Stylophora	pistillata	c	KC342190	LC-MS/MS
g15888		671	vitellogenin; nothing at 75%	Drake et al. 2013	Stylophora	pistillata	c	KC479164	LC-MS/MS
24181 1(a)		672	vonwillebrandfactor; nothing at 75%; Sp-Nell1L/similar to protein kinase c-binding protein nell1; domains: EGF, LamG, VWC	Mann et al. 2010	Strongylocentrotus	purpuratus	E	ref|XP_794227.3|	LC-MS
lotgi1|138864		673	DNAI/heat shock protein 40	Mann et al. 2012	Lottia	gigantea	M	lotgi1|138864	LC-MS/MS
EKC30863.1		673	DNAJ-like protein	Zhang et al. 2012	Crassostrea	gigas	M	EKC30863.1	LC-MS/MS
lotgi1|205205		674	B-catenin	Mann et al. 2012	Lottia	gigantea	M	lotgi1|205205	LC-MS/MS
EKC38193.1		674	B-catenin	Zhang et al. 2012	Crassostrea	gigas	M	EKC38193.1	LC-MS/MS
lotgi1|142681		675	transaldolase	Mann et al. 2012	Lottia	gigantea	M	lotgi1|142681	LC-MS/MS
EKC25566.1		675	transaldolase	Zhang et al. 2012	Crassostrea	gigas	M	EKC25566.1	LC-MS/MS
lotgi1|121721		676	transcriptional activator pur-a	Mann et al. 2012	Lottia	gigantea	M	lotgi1|121721	LC-MS/MS
EKC39351.1		676	transcriptional activator pur-a	Zhang et al. 2012	Crassostrea	gigas	M	EKC39351.1	LC-MS/MS
EKC35875.1	677	677	sushi, vwf a	Zhang et al. 2012	Crassostrea	gigas	M	EKC35875.1	LC-MS/MS
lotgi1|237510	677	677	chitin binding	Mann et al. 2012	Lottia	gigantea	M	lotgi1|237510	LC-MS/MS
lotgi1|228264	677	677	pif97, bmsp, vwf a	Mann et al. 2012	Lottia	gigantea	M	lotgi1|228264	LC-MS/MS
EKC37566	678	678	myosin heavy chain	Zhang et al. 2012	Crassostrea	gigas	M	EKC37566	LC-MS/MS
lotgi1|153235	678	678	paramyosin fragment	Mann et al. 2012	Lottia	gigantea	M	lotgi1|153235	LC-MS/MS
lotgi1|235233	678	678	paramyosin fragment	Mann et al. 2012	Lottia	gigantea	M	lotgi1|235233	LC-MS/MS
EKC19847.1	679	679	hypothetical protein	Zhang et al. 2012	Crassostrea	gigas	M	EKC19847.1	LC-MS/MS
lotgi66515	679	679	carbonic anhydrase	Mann et al. 2012	Lottia	gigantea	M	lotgi66515	LC-MS/MS
lotgi1|205401	679	679	carbonic anhydrase	Mann et al. 2012	Lottia	gigantea	M	lotgi1|205401	LC-MS/MS
EKC20149.1	680	680	laccase-18	Zhang et al. 2012	Crassostrea	gigas	M	EKC20149.1	LC-MS/MS
lotgi1|104132	680	680	uncharacterized protein	Mann et al. 2012	Lottia	gigantea	M	lotgi1|104132	LC-MS/MS
EKC36801.1	680	680	hypothetical protein	Zhang et al. 2012	Crassostrea	gigas	M	EKC36801.1	LC-MS/MS
lotgi1|124263	681	681	multicopper oxidase	Zhang et al. 2012	Crassostrea	gigas	M	lotgi1|124263	LC-MS/MS
EKC35993.1	681	681	laccase-15	Mann et al. 2012	Lottia	gigantea	M	EKC35993.1	LC-MS/MS
EKC28897	682	682	Carboxypeptidase inhibitor SmCI	Zhang et al. 2012	Crassostrea	gigas	M	EKC28897	LC-MS/MS
lotgi1|132911	682	682	Kunitz-type protease inhibitor KCP_HALAI	Mann et al. 2012	Lottia	gigantea	M	lotgi1|132911	LC-MS/MS
45 kDA		700	nothing at 75%	Keith et al. 1993	Mytilus	edulis	M

## Sheet: References
References
Alvares, K., Dixit, S. N., Lux, E. & Veis, A. 2009. Echinoderm Phosphorylated Matrix Proteins UTMP16 and UTMP19 Have Different Functions in Sea Urchin Tooth Mineralization. J Biol Chem 284(38): 26149-26160.
Azizur Rahman, M. & Isa, Y. 2005. Characterization of proteins from the matrix of spicules from the alcyonarian, Lobophytum crassum. J Exp Mar Biol Ecol 321(1): 71-82.
Bédouet, L., José Schuller, M., Marin, F., Milet, C., Lopez, E. & Giraud, M. 2001. Soluble proteins of the nacre of the giant oyster Pinctada maxima and of the abalone Haliotis tuberculata:: extraction and partial analysis of nacre proteins. Comparative Biochemistry and Physiology Part B: Biochemistry and Molecular Biology 128(3): 389-400.
Bertucci, A., Tambutté, S., Supuran, C., Allemand, D. & Zoccola, D. 2011. A new coral carbonic anhydrase in Stylophora pistillata. Mar Biotechnol 13(5): 992-1002.
Bowen, C. E. & Tang, H. 1996. Conchiolin-protein in aragonite shells of mollusks. Comparative Biochemistry and Physiology Part A: Physiology 115(4): 269-275.
Costa, C., Karakostis, K., Zito, F. & Matranga, V. 2012. Phylogenetic analysis and expression patterns of p16 and p19 in Paracentrotus lividus embryos. Dev Genes Evol 222(4): 245-251.
Drake, J. L., Mass, T., Haramaty, L., Zelzion, E., Bhattacharya, D. & Falkowski, P. G. 2013. Proteomic analysis of skeletal organic matrix from the stony coral Stylophora pistillata. Proceedings of the National Academy of Sciences 110(10): 3788-3793.
Evans, J. S. 2012. Aragonite-associated biomineralization proteins are disordered and contain interactive motifs. Bioinformatics 28(24): 3182-3185.
Fang, D., Pan, C., Lin, H., Lin, Y., Zhang, G., Wang, H., He, M., Xie, L. & Zhang, R. 2012. Novel Basic Protein, PfN23, Functions as Key Macromolecule during Nacre Formation. J Biol Chem 287(19): 15776-15785.
Fukuda, I., Ooki, S., Fujita, T., Murayama, E., Nagasawa, H., Isa, Y. & Watanabe, T. 2003. Molecular cloning of a cDNA encoding a soluble protein in the coral exoskeleton. Biochem Biophys Res Commun 304(1): 11-17.
Gotliv, B.-A., Kessler, N., Sumerel, J. L., Morse, D. E., Tuross, N., Addadi, L. & Weiner, S. 2005. Asprich: A novel aspartic acid-rich protein family from the prismatic shell matrix of the bivalve Atrina rigida. ChemBioChem 6(2): 304-314.
Hasegawa, Y. & Uchiyama, K. 2005. cDNA clonings of shell matrix proteins from scallop shell. Fish Sci 71(5): 1174-1178.
Hattan, S. J., Laue, T. M. & Chasteen, N. D. 2001. Purification and Characterization of a Novel Calcium-binding Protein from the Extrapallial Fluid of the Mollusc, Mytilus edulis. J Biol Chem 276(6): 4461-4468.
Hayward, D. C., Hetherington, S., Behm, C. A., Grasso, L. C., Foret, S., Miller, D. J. & Ball, E. E. 2011. Differential gene expression at coral settlement and metamorphosis - a subtractive hybridization study. PLoS ONE 6(10): e26411.
Huang, J., Zhang, C., Ma, Z., Xie, L. & Zhang, R. 2007. A novel extracellular EF-hand protein involved in the shell formation of pearl oyster. Biochimica et Biophysica Acta (BBA) - General Subjects 1770(7): 1037-1044.
Illies, M., Peeler, M., Dechtiaruk, A. & Ettensohn, C. 2002. Identification and developmental expression of new biomineralization proteins in the sea urchin Strongylocentrotus purpuratus. Dev Genes Evol 212(9): 419-431.
Joubert, C., Piquemal, D., Marie, B., Manchon, L., Pierrat, F., Zanella-Cleon, I., Cochennec-Laureau, N., Gueguen, Y. & Montagnani, C. 2010. Transcriptome and proteome analysis of Pinctada margaritifera calcifying mantle and shell: Focus on biomineralization. BMC Genomics 11(1): 613.
Kaniewska, P., Campbell, P. R., Kline, D. I., Rodriguez-Lanetty, M., Miller, D. J., Dove, S. & Hoegh-Guldberg, O. 2012. Major cellular and physiological impacts of ocean acidification on a reef building coral. PLoS ONE 7(4): e34659.
Keith, J., Stockwell, S., Ball, D., Remillard, K., Kaplan, D., Thannhauser, T. & Sherwood, R. 1993. Comparative analysis of macromolecules in mollusc shells. Comparative Biochemistry and Physiology Part B: Comparative Biochemistry 105(3): 487-496.
Kinoshita, S., Wang, N., Inoue, H., Maeyama, K., Okamoto, K., Nagai, K., Kondo, H., Hirono, I., Asakawa, S. & Watabe, S. 2011. Deep Sequencing of ESTs from Nacreous and Prismatic Layer Producing Tissues and a Screen for Novel Shell Formation-Related Genes in the Pearl Oyster. PLoS ONE 6(6): e21238.
Kong, Y., Jing, G., Yan, Z., Li, C., Gong, N., Zhu, F., Li, D., Zhang, Y., Zheng, G., Wang, H., et al. 2009. Cloning and Characterization of Prisilkin-39, a Novel Matrix Protein Serving a Dual Role in the Prismatic Layer Formation from the Oyster Pinctada fucata. J Biol Chem 284(16): 10841-10854.
Kono, M., Hayashi, N. & Samata, T. 2000. Molecular Mechanism of the Nacreous Layer Formation in Pinctada maxima. Biochem Biophys Res Commun 269(1): 213-218.
Lee, S., Kim, Y., Choi, H., Yang, J. & Choi, C. 2006. Primary Structure of Myostracal Prism Soluble Protein (MPSP) in Oyster Shell, Crassostrea gigas. The Protein Journal 25(4): 288-294.
Li, S., Xie, L., Ma, Z. & Zhang, R. 2005. cDNA cloning and characterization of a novel calmodulin-like protein from pearl oyster Pinctada fucata. FEBS J 272(19): 4899-4910.
Liu, H.-L., Liu, S.-F., Ge, Y.-J., Liu, J., Wang, X.-Y., Xie, L.-P., Zhang, R.-Q. & Wang, Z. 2006. Identification and Characterization of a Biomineralization Related Gene PFMG1 Highly Expressed in the Mantle of Pinctada fucata†. Biochemistry 46(3): 844-851.
Ma, Z., Huang, J., Sun, J., Wang, G., Li, C., Xie, L. & Zhang, R. 2007. A novel extrapallial fluid protein controls the morphology of nacre lamellae in the pearl oyster, Pinctada fucata. J Biol Chem 282(32): 23253-23263.
Mann, K., Edsinger-Gonzales, E. & Mann, M. 2012. In-depth proteomic analysis of a mollusc shell: acid-soluble and acid-insoluble matrix of the limpet Lottia gigantea. Proteome science 10(1): 1-18.
Mann, K., Poustka, A. & Mann, M. 2008. In-depth, high-accuracy proteomics of sea urchin tooth organic matrix. Proteome science 6(1): 33.
Mann, K., Poustka, A. & Mann, M. 2008. The sea urchin (Strongylocentrotus purpuratus) test and spine proteomes. Proteome science 6(1): 22.
Mann, K., Siedler, F., Treccani, L., Heinemann, F. & Fritz, M. 2007. Perlinhibin, a Cysteine-, Histidine-, and Arginine-Rich Miniprotein from Abalone (Haliotis laevigata) Nacre, Inhibits In Vitro Calcium Carbonate Crystallization. Biophys J 93(4): 1246-1254.
Mann, K., Wilt, F. H. & Poustka, A. J. 2010. Proteomic analysis of sea urchin (Strongylocentrotus purpuratus) spicule matrix. Proteome Science 8: 33.
Marie, B., Marie, A., Jackson, D., Dubost, L., Degnan, B., Milet, C. & Marin, F. 2010. Proteomic analysis of the organic matrix of the abalone Haliotis asinina calcified shell. Proteome science 8(1): 54.
Marie, B., Marie, A., Jackson, D., Dubost, L., Degnan, B., Milet, C. & Marin, F. 2010. Proteomic analysis of the organic matrix of the abalone Haliotis asinina calcified shell. Proteome science 8(1): 54.
Marie, B., Roy, N., Zanella-Cléon, I., Becchi, M. & Marin, F. 2011. Molecular evolution of mollusc shell proteins: Insights from proteomic analysis of the edible mussel Mytilus. J Mol Evol 72(5-6): 531-546.
Marie, B., Trinkler, N., Zanella-Cleon, I., Guichard, N., Becchi, M., Paillard, C. & Marin, F. 2011. Proteomic identification of novel proteins from the calcifying shell matrix of the Manila clam Venerupis philippinarum. Mar Biotechnol 13(5): 955-962.
Marie, B., Trinkler, N., Zanella-Cleon, I., Guichard, N., Becchi, M., Paillard, C. & Marin, F. 2011. Proteomic identification of novel proteins from the calcifying shell matrix of the Manila clam Venerupis philippinarum. Mar Biotechnol 13(5): 955-962.
Marin, F., Amons, R., Guichard, N., Stigter, M., Hecker, A., Luquet, G., Layrolle, P., Alcaraz, G., Riondet, C. & Westbroek, P. 2005. Caspartin and Calprismin, Two Proteins of the Shell Calcitic Prisms of the Mediterranean Fan Mussel Pinna nobilis. J Biol Chem 280(40): 33895-33908.
Marin, F., Corstjens, P., De Gaulejac, B., De Vrind-De Jong, E. & Westbroek, P. 2000. Mucins and Molluscan Calcification: Molecular characterization of mucoperlin, a novel mucin-like protein from the nacreous shell layer of the fan mussel Pinna nobilis (Bivalvia, Pteriomorphia). J Biol Chem 275(27): 20667-20675.
Martin, S., Richier, S., Pedrotti, M.-L., Dupont, S., Castejon, C., Gerakis, Y., Kerros, M.-E., Oberhänsli, F., Teyssié, J.-L., Jeffree, R., et al. 2011. Early development and molecular plasticity in the Mediterranean sea urchin Paracentrotus lividus exposed to CO2-driven acidification. The Journal of Experimental Biology 214(8): 1357-1368.
Mass, T., Drake, Jeana l., Haramaty, L., Kim, J. D., Zelzion, E., Bhattacharya, D. & Falkowski, Paul g. 2013. Cloning and characterization of four novel coral acid-rich proteins that precipitate carbonates in vitro. Curr Biol 23(12): 1126-1131.
Michenfelder, M., Fu, G., Lawrence, C., Weaver, J. C., Wustman, B. A., Taranto, L., Evans, J. S. & Morse, D. E. 2003. Characterization of two molluscan crystal-modulating biomineralization proteins and identification of putative mineral binding domains. Biopolymers 70(4): 522-533.
Miyamoto, H., Miyashita, T., Okushima, M., Nakano, S., Morita, T. & Matsushiro, A. 1996. A carbonic anhydrase from the nacreous layer in oyster pearls. Proceedings of the National Academy of Sciences 93(18): 9657-9660.
Miyashita, T., Takagi, R., Okushima, M., Nakano, S., Miyamoto, H., Nishikawa, E. & Matsushiro, A. 2000. Complementary DNA cloning and characterization of pearlin, a new class of matrix protein in the nacreous layer of oyster pearls. Mar Biotechnol 2(5): 409-418.
Moya, A., Huisman, L., Ball, E. E., Hayward, D. C., Grasso, L. C., Chua, C. M., Woo, H. N., Gattuso, J. P., Forêt, S. & Miller, D. J. 2012. Whole transcriptome analysis of the coral Acropora millepora reveals complex responses to CO2-driven acidification during the initiation of calcification. Mol Ecol 21(10): 2440-2454.
Moya, A., Tambutté, S., Bertucci, A., Tambutté, E., Lotto, S., Vullo, D., Supuran, C. T., Allemand, D. & Zoccola, D. 2008. Carbonic anhydrase in the scleractinian coral Stylophora pistillata. J Biol Chem 283(37): 25475-25484.
Nogawa, C., Baba, H., Masaoka, T., Aoki, H. & Samata, T. 2012. Genetic structure and polymorphisms of the N16 gene in Pinctada fucata. Gene 504(1): 84-91.
Puverel, S., Tambutte, E., Pereira-Mouries, L., Zoccola, D., Allemand, D. & Tambutte, S. 2005. Soluble organic matrix of two Scleractinian corals: partial and comparative analysis. Comparative Biochemistry and Physiology Part B 141: 480-487.
Puverel, S., Tambutte, E., Pereira-Mouries, L., Zoccola, D., Allemand, D. & Tambutte, S. 2005. Soluble organic matrix of two Scleractinian corals: partial and comparative analysis. Comparative Biochemistry and Physiology Part B 141: 480-487.
Rahman, A., Oomori, T. & Woerheide, G. 2011. Calcite formation in soft coral sclerites is determined by a single reactive extracellular protein. J Biol Chem.
Rahman, M. A., Isa, Y. & Yuehara, T. 2005. Proteins of calcified endoskeleton: II partial amino acid sequences of endoskeletal proteins and the characterization of proteinaceous organic matrix of spicules from the alcyonarian, Synularia polydactyla. Proteomics 5: 885-893.
Rahman, M. A., Isa, Y., Takemura, A. & Uehara, T. 2006. Analysis of proteinaceous components of the organic matrix of endoskeletal sclerites from the Alcyonarian Lobophytum crassum. Calcif Tissue Int 78: 178-185.
Ramos-Silva, P., Kaandorp, J., Huisman, L., Marie, B., Zanella-Cleon, I., Guichard, N., Miller, D. J. & Marin, F. 2013. The skeletal proteome of the coral Acropora millepora: The evolution of calcification by cooption and domain shuffling. Mol Biol Evol.
Reyes-Bermudez, A., Lin, Z., Hayward, D. C., Miller, D. J. & Ball, E. E. 2009. Differential expression of three galaxin-related genes during settlement and metamorphosis in the scleractinian coral Acropora millepora. BMC Evol Biol 9: 178.
Samata, T., Hayashi, N., Kono, M., Hasegawa, K., Horita, C. & Akera, S. 1999. A new matrix protein family related to the nacreous layer formation of Pinctada fucata. FEBS Lett 462(1–2): 225-229.
Sarashina, I. & Endo, K. 1998. Primary structure of a soluble matrix protein of scallop shell: implications for calcium carbonate biomineralization. American Mineralogist 83: 1510-1515.
Sarashina, I. & Endo, K. 2001. The complete primary structure of molluscan shell protein 1 (MSP-1), an acidic glycoprotein in the shell matrix of the scallop Patinopecten yessoensis. Mar Biotechnol 3(4): 362-369.
Shen, X., Belcher, A. M., Hansma, P. K., Stucky, G. D. & Morse, D. E. 1997. Molecular Cloning and Characterization of Lustrin A, a Matrix Protein from Shell and Pearl Nacre of Haliotis rufescens. J Biol Chem 272(51): 32472-32481.
Shiomi, K., Yamazaki, A., Kagawa, M., Kiyomoto, M. & Yamaguchi, M. 2012. Par6 regulates skeletogenesis and gut differentiation in sea urchin larvae. Dev Genes Evol 222(5): 269-278.
Stumpp, M., Dupont, S., Thorndyke, M. C. & Melzner, F. 2011. CO2 induced seawater acidification impacts sea urchin larval development II: Gene expression patterns in pluteus larvae. Comparative Biochemistry and Physiology Part A: Molecular & Integrative Physiology 160(3): 320-330.
Sudo, S., Fujikawa, T., Nagakura, T., Ohkubo, T., Sakaguchi, K., Tanaka, M., Nakashima, K. & Takahashi, T. 1997. Structures of mollusc shell framework proteins. Nature 387(6633): 563-564.
Suzuki, M., Murayama, E., Inoue, H., Ozaki, N., Tohse, H., Kogure, T. & Nagasawa, H. 2004. Characterization of Prismalin-14, a novel matrix protein from the prismatic layer of the Japanese pearl oyster (Pinctada fucata). Biochem J 382(1): 205-213.
Suzuki, M., Saruwatari, K., Kogure, T., Yamamoto, Y., Nishimura, T., Kato, T. & Nagasawa, H. 2009. An acidic matrix protein, Pif, Is a key macromolecule for nacre formation. Science 325(5946): 1388-1390.
Takagi, R. & Miyashita, T. 2010. Prismin: A New Matrix Protein Family in the Japanese Pearl Oyster (Pinctada fucata) Involved in Prismatic Layer Formation. Zool Sci 27(5): 416-426.
Todgham, A. E. & Hofmann, G. E. 2009. Transcriptomic response of sea urchin larvae Strongylocentrotus purpuratus to CO2-driven seawater acidification. J Exp Biol 212(16): 2579-2594.
Traylor-Knowles, N., Granger, B., Lubinski, T., Parikh, J., Garamszegi, S., Xia, Y., Marto, J., Kaufman, L. & Finnerty, J. 2011. Production of a reference transcriptome and a transcriptomic database (PocilloporaBase) for the cauliflower coral, Pocillopora damicornis. BMC Genomics 12(1): 585.
Treccani, L., Mann, K., Heinemann, F. & Fritz, M. 2006. Perlwapin, an Abalone Nacre Protein with Three Four-Disulfide Core (Whey Acidic Protein) Domains, Inhibits the Growth of Calcium Carbonate Crystals. Biophys J 91(7): 2601-2608.
Tsukamoto, D., Sarashina, I. & Endo, K. 2004. Structure and expression of an unusually acidic matrix protein of pearl oyster shells. Biochem Biophys Res Commun 320(4): 1175-1180.
Weiss, I. M., Kaufmann, S., Mann, K. & Fritz, M. 2000. Purification and Characterization of Perlucin and Perlustrin, Two New Proteins from the Shell of the Mollusc Haliotis laevigata. Biochem Biophys Res Commun 267(1): 17-21.
Yano, M., Nagai, K., Morimoto, K. & Miyamoto, H. 2006. Shematrin: A family of glycine-rich structural proteins in the shell of the pearl oyster Pinctada fucata. Comparative Biochemistry and Physiology Part B: Biochemistry and Molecular Biology 144(2): 254-262.
Yano, M., Nagai, K., Morimoto, K. & Miyamoto, H. 2007. A novel nacre protein N19 in the pearl oyster Pinctada fucata. Biochem Biophys Res Commun 362(1): 158-163.
Yin, Y., Huang, J., Paine, M. L., Reinhold, V. N. & Chasteen, N. D. 2005. Structural Characterization of the Major Extrapallial Fluid Protein of the Mollusc Mytilus edulis: Implications for Function†. Biochemistry 44(31): 10720-10731.
Zhang, C., Xie, L., Huang, J., Liu, X. & Zhang, R. 2006. A novel matrix protein family participating in the prismatic layer framework formation of pearl oyster, Pinctada fucata. Biochem Biophys Res Commun 344(3): 735-740.
Zhang, G., Fang, X., Guo, X., Li, L., Luo, R., Xu, F., Yang, P., Zhang, L., Wang, X., Qi, H., et al. 2012. The oyster genome reveals stress adaptation and complexity of shell formation. Nature 490(7418): 49-54.
Zhang, Y., Xie, L., Meng, Q., Jiang, T., Pu, R., Chen, L. & Zhang, R. 2003. A novel matrix protein participating in the nacre framework formation of pearl oyster, Pinctada fucata. Comparative Biochemistry and Physiology Part B: Biochemistry and Molecular Biology 135(3): 565-573.
Zoccola, D., Moya, A., Béranger, G., Tambutté, E., Allemand, D., Carle, G. & Tambutté, S. 2009. Specific expression of BMP2/4 ortholog in biomineralizing tissues of corals and action on mouse BMP receptor. Mar Biotechnol 11(2): 260-269.
